# Supplementary material
Source: publisher figshare collection journal article supplement (https://gsajournals.figshare.com/ndownloader/files/18714671)
Supplement: Supplementary file 1 [file 18714671]

## Sheet: Sheet1
Code	Gene_id	90128_24_readcount(90128_24vsck)	ck_readcount(90128_24vsck)	log2FoldChange(90128_24vsck)	pval(90128_24vsck)	padj(90128_24vsck)	significant(90128_24vsck)	biological_process	biological_process_description	cellular_component	cellular_component_description	molecular_function	molecular_function_description	KEGG AnnotInfo	KEGG url	Gene name	Interpro Description
1	Novel00002	53.1305	926.147	-4.1236	3.8878e-07	3.8105e-06	DOWN	GO:0051704//GO:0009405//GO:0019835//GO:0009987//GO:0008150	multi-organism process//pathogenesis//cytolysis//cellular process//biological_process	GO:0019867//GO:0005575//GO:0016020	outer membrane//cellular_component//membrane	GO:0046872//GO:0005488//GO:0046914//GO:0005515//GO:0043169//GO:0003674//GO:0043167//GO:0008270	metal ion binding//binding//transition metal ion binding//protein binding//cation binding//molecular_function//ion binding//zinc ion binding	--	--	--	PREDICTED: uncharacterized protein LOC101249008 [Solanum lycopersicum]>gi|723729369|ref|XP_010326185.1| PREDICTED: uncharacterized protein LOC101249008 [Solanum lycopersicum]>gi|723729372|ref|XP_010326186.1| PREDICTED: uncharacterized protein LOC101249008 [Solanum lycopersicum]>gi|723729375|ref|XP_010326187.1| PREDICTED: uncharacterized protein LOC101249008 [Solanum lycopersicum]>gi|723729378|ref…
2	Novel00003	14.8227	232.697	-3.9726	4.799e-07	4.6137e-06	DOWN	GO:0046483//GO:0044238//GO:0045184//GO:0015031//GO:0090304//GO:0006397//GO:0051179//GO:0010467//GO:0006807//GO:0016070//GO:0034641//GO:0043170//GO:0044237//GO:1901360//GO:0006139//GO:0008104//GO:0006396//GO:0009987//GO:0008150//GO:0006810//GO:0051234//GO:0071704//GO:0006725//GO:0033036//GO:0044260//GO:0071702//GO:0016071//GO:0008152	heterocycle metabolic process//primary metabolic process//establishment of protein localization//protein transport//nucleic acid metabolic process//mRNA processing//localization//gene expression//nitrogen compound metabolic process//RNA metabolic process//cellular nitrogen compound metabolic process//macromolecule metabolic process//cellular metabolic process//organic cyclic compound metabolic pr…	GO:0031224//GO:0016021//GO:0044425//GO:0016020//GO:0005575	intrinsic component of membrane//integral component of membrane//membrane part//membrane//cellular_component	GO:0005215//GO:0008565//GO:0004540//GO:0004518//GO:0003824//GO:0016788//GO:0003674//GO:0016787	transporter activity//protein transporter activity//ribonuclease activity//nuclease activity//catalytic activity//hydrolase activity, acting on ester bonds//molecular_function//hydrolase activity	no KO assigned | (RefSeq) uncharacterized LOC102597189	http://www.genome.jp/dbget-bin/www_bget?sot:102597189	--	--
3	Novel00007	11.2294	313.632	-4.8037	1.8058e-12	5.0245e-11	DOWN	GO:0019080//GO:0019438//GO:0044033//GO:0008150//GO:0044249//GO:1901362//GO:0009987//GO:0008152//GO:0019083//GO:0006725//GO:0071704//GO:0044260//GO:1901576//GO:0019058//GO:0034654//GO:0018130//GO:0044419//GO:0032774//GO:0034641//GO:0016070//GO:0090304//GO:0044764//GO:0044238//GO:0046483//GO:0009058//GO:0006807//GO:0010467//GO:0044403//GO:0016032//GO:0044237//GO:0044271//GO:1901360//GO:0006139//GO:…	viral gene expression//aromatic compound biosynthetic process//multi-organism metabolic process//biological_process//cellular biosynthetic process//organic cyclic compound biosynthetic process//cellular process//metabolic process//viral transcription//cellular aromatic compound metabolic process//organic substance metabolic process//cellular macromolecule metabolic process//organic substance bios…	--	--	GO:0003824//GO:1901363//GO:0030976//GO:0097159//GO:0050662//GO:0000287//GO:0043167//GO:0036094//GO:0003674//GO:0043169//GO:1901681//GO:0043168//GO:0005488//GO:0046872//GO:0048037//GO:0019842	catalytic activity//heterocyclic compound binding//thiamine pyrophosphate binding//organic cyclic compound binding//coenzyme binding//magnesium ion binding//ion binding//small molecule binding//molecular_function//cation binding//sulfur compound binding//anion binding//binding//metal ion binding//cofactor binding//vitamin binding	K14759 isochorismate synthase / 2-succinyl-5-enolpyruvyl-6-hydroxy-3-cyclohexene-1-carboxylate synthase / 2-succinyl-6-hydroxy-2,4-cyclohexadiene-1-carboxylate synthase / O-succinylbenzoate synthase [EC:5.4.4.2 2.2.1.9 4.2.99.20 4.2.1.113] | (RefSeq) protein PHYLLO, chloroplastic	http://www.genome.jp/dbget-bin/www_bget?sot:102603926	--	PREDICTED: protein PHYLLO, chloroplastic-like [Solanum tuberosum]
4	Novel00033	514.723	1755.83	-1.7703	0.0018577	0.0070053	DOWN	--	--	GO:0005623//GO:0005634//GO:0005622//GO:0044464//GO:0044424//GO:0043229//GO:0043226//GO:0043231//GO:0005575//GO:0043227	cell//nucleus//intracellular//cell part//intracellular part//intracellular organelle//organelle//intracellular membrane-bounded organelle//cellular_component//membrane-bounded organelle	--	--	no KO assigned | (RefSeq) cytochrome P450 71A1-like	http://www.genome.jp/dbget-bin/www_bget?sot:102591607	--	PREDICTED: cytochrome P450 71A1-like [Solanum lycopersicum]
5	Novel00041	34.6282	141.21	-2.0278	2.6901e-06	2.162e-05	DOWN	GO:0043170//GO:0019222//GO:0019219//GO:0015849//GO:0009059//GO:0044237//GO:0015711//GO:0006323//GO:0006950//GO:0080134//GO:0006811//GO:0006139//GO:1901360//GO:0044271//GO:0008104//GO:0044238//GO:0046483//GO:0045184//GO:0006886//GO:0006820//GO:0090304//GO:0015031//GO:0016043//GO:0051179//GO:0006996//GO:0010467//GO:0071840//GO:0006807//GO:1901700//GO:0009058//GO:0050896//GO:0015740//GO:0050794//GO:…	macromolecule metabolic process//regulation of metabolic process//regulation of nucleobase-containing compound metabolic process//organic acid transport//macromolecule biosynthetic process//cellular metabolic process//organic anion transport//DNA packaging//response to stress//regulation of response to stress//ion transport//nucleobase-containing compound metabolic process//organic cyclic compoun…	GO:0016021//GO:0043229//GO:0044424//GO:0044425//GO:0044464//GO:0031224//GO:0012505//GO:0005622//GO:0005634//GO:0005623//GO:0044444//GO:0043227//GO:0016020//GO:0005575//GO:0043231//GO:0005737//GO:0043226//GO:0005783	integral component of membrane//intracellular organelle//intracellular part//membrane part//cell part//intrinsic component of membrane//endomembrane system//intracellular//nucleus//cell//cytoplasmic part//membrane-bounded organelle//membrane//cellular_component//intracellular membrane-bounded organelle//cytoplasm//organelle//endoplasmic reticulum	GO:0051427//GO:0035257//GO:0008233//GO:0004190//GO:0005488//GO:0070001//GO:0005515//GO:0008134//GO:0042974//GO:0003674//GO:0004175//GO:0016787//GO:0070011//GO:0005102//GO:0003824	hormone receptor binding//nuclear hormone receptor binding//peptidase activity//aspartic-type endopeptidase activity//binding//aspartic-type peptidase activity//protein binding//transcription factor binding//retinoic acid receptor binding//molecular_function//endopeptidase activity//hydrolase activity//peptidase activity, acting on L-amino acid peptides//signaling receptor binding//catalytic acti…	--	--	--	PREDICTED: uncharacterized protein LOC101258014 [Solanum lycopersicum]
6	Novel00045	10.7764	39.089	-1.8589	0.011314	0.032806	DOWN	--	--	--	--	--	--	--	--	--	--
7	Novel00046	1418.07	3213.15	-1.1801	0.001998	0.0074574	DOWN	--	--	--	--	--	--	--	--	--	--
8	Novel00054	24.8772	256.311	-3.365	5.7859e-12	1.4744e-10	DOWN	GO:1901360//GO:0044271//GO:0044237//GO:0042357//GO:0072528//GO:0009229//GO:0034641//GO:0090407//GO:0018130//GO:0006732//GO:0006807//GO:0009058//GO:0046483//GO:0009108//GO:0051186//GO:0006793//GO:0044272//GO:0008152//GO:0015979//GO:1901576//GO:0071704//GO:0006725//GO:1901566//GO:0044249//GO:1901564//GO:0008150//GO:0051188//GO:0072527//GO:0019438//GO:0006796//GO:0019637//GO:0009987//GO:0006790//GO:…	organic cyclic compound metabolic process//cellular nitrogen compound biosynthetic process//cellular metabolic process//thiamine diphosphate metabolic process//pyrimidine-containing compound biosynthetic process//thiamine diphosphate biosynthetic process//cellular nitrogen compound metabolic process//organophosphate biosynthetic process//heterocycle biosynthetic process//coenzyme metabolic proces…	GO:0044424//GO:0044425//GO:0009522//GO:0009521//GO:0005623//GO:0005622//GO:0044464//GO:0005575//GO:0032991//GO:0016020//GO:0098796//GO:0044436//GO:0009579//GO:0034357	intracellular part//membrane part//photosystem I//photosystem//cell//intracellular//cell part//cellular_component//protein-containing complex//membrane//membrane protein complex//thylakoid part//thylakoid//photosynthetic membrane	GO:0005488//GO:0030975//GO:0019842//GO:1901681//GO:0003674//GO:0036094//GO:1901363//GO:0097159	binding//thiamine binding//vitamin binding//sulfur compound binding//molecular_function//small molecule binding//heterocyclic compound binding//organic cyclic compound binding	K02697 photosystem I subunit IX | (RefSeq) psaJ, SotuCp041; photosystem I subunit IX	http://www.genome.jp/dbget-bin/www_bget?sot:4099866	--	PREDICTED: uncharacterized protein LOC101245774 [Solanum lycopersicum]
9	Novel00058	275.647	605.362	-1.135	3.4492e-05	0.00021192	DOWN	--	--	--	--	--	--	K04120 ent-copalyl diphosphate synthase [EC:5.5.1.13] | (RefSeq) ent-copalyl diphosphate synthase, chloroplastic-like	http://www.genome.jp/dbget-bin/www_bget?sot:102596242	--	PREDICTED: ent-copalyl diphosphate synthase, chloroplastic [Nicotiana sylvestris]
10	Novel00062	90.5085	607.717	-2.7473	0.0048661	0.015961	DOWN	GO:0008150//GO:0009987//GO:0006338//GO:0051276//GO:0043933//GO:0016043//GO:0006325//GO:0071840//GO:0006996	biological_process//cellular process//chromatin remodeling//chromosome organization//protein-containing complex subunit organization//cellular component organization//chromatin organization//cellular component organization or biogenesis//organelle organization	GO:0043226//GO:0043227//GO:0043231//GO:0005575//GO:0005623//GO:0044464//GO:0005634//GO:0005622//GO:0044424//GO:0043229	organelle//membrane-bounded organelle//intracellular membrane-bounded organelle//cellular_component//cell//cell part//nucleus//intracellular//intracellular part//intracellular organelle	GO:0003824//GO:0030554//GO:1901363//GO:0003676//GO:0097159//GO:0005524//GO:0032553//GO:0016787//GO:0032550//GO:0032555//GO:0035639//GO:0043167//GO:0016818//GO:0036094//GO:0003674//GO:0001883//GO:0000166//GO:0001882//GO:0043168//GO:0016817//GO:0032549//GO:0032559//GO:0005488//GO:1901265//GO:0097367//GO:0017076	catalytic activity//adenyl nucleotide binding//heterocyclic compound binding//nucleic acid binding//organic cyclic compound binding//ATP binding//ribonucleotide binding//hydrolase activity//purine ribonucleoside binding//purine ribonucleotide binding//purine ribonucleoside triphosphate binding//ion binding//hydrolase activity, acting on acid anhydrides, in phosphorus-containing anhydrides//small …	K09422 myb proto-oncogene protein, plant | (RefSeq) AN1; transcription factor R2R3-MYB	http://www.genome.jp/dbget-bin/www_bget?sot:102577602	--	PREDICTED: transcription factor MYB90-like, partial [Solanum tuberosum]
11	Novel00071	10.6253	85.549	-3.0093	1.8737e-07	1.9586e-06	DOWN	--	--	--	--	--	--	K16315 serine/threonine-protein kinase haspin [EC:2.7.11.1] | (RefSeq) putative serine/threonine-protein kinase haspin homolog	http://www.genome.jp/dbget-bin/www_bget?sot:102585417	--	PREDICTED: putative serine/threonine-protein kinase haspin homolog [Solanum tuberosum]
12	Novel00081	0.655185	28.3995	-5.4378	1.4031e-05	9.4464e-05	DOWN	--	--	--	--	--	--	--	--	--	--
13	Novel00087	4.38415	37.6091	-3.1007	0.00025914	0.0012695	DOWN	--	--	--	--	--	--	no KO assigned | (RefSeq) GATA zinc finger domain-containing protein 14-like	http://www.genome.jp/dbget-bin/www_bget?sot:102594880	--	PREDICTED: BURP domain-containing protein 17-like [Solanum tuberosum]
14	Novel00090	45.5456	127.775	-1.4882	0.00048734	0.0022001	DOWN	--	--	--	--	--	--	K14326 regulator of nonsense transcripts 1 [EC:3.6.4.-] | (RefSeq) regulator of nonsense transcripts 1 homolog	http://www.genome.jp/dbget-bin/www_bget?sot:102597499	--	PREDICTED: regulator of nonsense transcripts 1 homolog [Solanum tuberosum]
15	Novel00113	144.566	383.488	-1.4075	4.0913e-06	3.1516e-05	DOWN	--	--	--	--	GO:0001883//GO:0000166//GO:0001882//GO:1901265//GO:0097367//GO:0017076//GO:0043168//GO:0032549//GO:0032559//GO:0005488//GO:0097159//GO:0030554//GO:1901363//GO:0043167//GO:0003674//GO:0036094//GO:0032553//GO:0032550//GO:0043531//GO:0032555	purine nucleoside binding//nucleotide binding//nucleoside binding//nucleoside phosphate binding//carbohydrate derivative binding//purine nucleotide binding//anion binding//ribonucleoside binding//adenyl ribonucleotide binding//binding//organic cyclic compound binding//adenyl nucleotide binding//heterocyclic compound binding//ion binding//molecular_function//small molecule binding//ribonucleotide …	no KO assigned | (RefSeq) probable disease resistance protein At4g27220	http://www.genome.jp/dbget-bin/www_bget?sot:102605409	--	PREDICTED: probable disease resistance protein At4g27220-like [Solanum tuberosum]
16	Novel00116	4.00461	50.3504	-3.6523	0.0036625	0.012557	DOWN	--	--	--	--	--	--	--	--	--	Putative polyprotein, identical [Solanum demissum]
17	Novel00121	23.0806	149.005	-2.6906	3.0613e-05	0.00019053	DOWN	--	--	--	--	--	--	--	--	--	Polyprotein, 3'-partial, putative [Solanum demissum]
18	Novel00122	76.1695	238.605	-1.6473	3.6127e-06	2.8247e-05	DOWN	--	--	--	--	--	--	--	--	--	PREDICTED: uncharacterized protein LOC102587773 [Solanum tuberosum]
19	Novel00135	19.8846	74.3371	-1.9024	0.00059177	0.002595	DOWN	GO:0046128//GO:0019319//GO:0006163//GO:0009126//GO:0009185//GO:0006090//GO:1901657//GO:0016051//GO:0008150//GO:1901564//GO:0006757//GO:0009199//GO:0006733//GO:0009987//GO:0044281//GO:0006796//GO:0019318//GO:0006082//GO:0009056//GO:0019637//GO:0009144//GO:0008152//GO:0046939//GO:0032787//GO:0032196//GO:0006793//GO:0009141//GO:0009117//GO:0009123//GO:0071704//GO:0009132//GO:0006006//GO:0006725//GO:…	purine ribonucleoside metabolic process//hexose biosynthetic process//purine nucleotide metabolic process//purine nucleoside monophosphate metabolic process//ribonucleoside diphosphate metabolic process//pyruvate metabolic process//glycosyl compound metabolic process//carbohydrate biosynthetic process//biological_process//organonitrogen compound metabolic process//ATP generation from ADP//ribonuc…	GO:0005737//GO:0005575//GO:0005623//GO:0044464//GO:0005622//GO:0044424	cytoplasm//cellular_component//cell//cell part//intracellular//intracellular part	GO:1901363//GO:0003676//GO:0003824//GO:0016788//GO:0004347//GO:0004523//GO:0016860//GO:0097159//GO:0004518//GO:0016787//GO:0016853//GO:0004803//GO:0003674//GO:0016891//GO:0003677//GO:0016861//GO:0004521//GO:0004519//GO:0005488//GO:0016893//GO:0004540	heterocyclic compound binding//nucleic acid binding//catalytic activity//hydrolase activity, acting on ester bonds//glucose-6-phosphate isomerase activity//RNA-DNA hybrid ribonuclease activity//intramolecular oxidoreductase activity//organic cyclic compound binding//nuclease activity//hydrolase activity//isomerase activity//transposase activity//molecular_function//endoribonuclease activity, prod…	--	--	--	PREDICTED: uncharacterized protein LOC104238338 [Nicotiana sylvestris]
20	Novel00141	27.0638	66.5648	-1.2984	0.017502	0.047601	DOWN	--	--	--	--	--	--	K13420 LRR receptor-like serine/threonine-protein kinase FLS2 [EC:2.7.11.1] | (RefSeq) LRR receptor-like serine/threonine-protein kinase FLS2	http://www.genome.jp/dbget-bin/www_bget?sot:102592377	--	polypepetide with reverse transcriptase and RNaseH domains [Petunia x hybrida]
21	Novel00144	41.9618	133.848	-1.6734	0.00056518	0.0025002	DOWN	--	--	--	--	--	--	--	--	--	--
22	Novel00160	15.0682	70.751	-2.2312	0.0001418	0.00074351	DOWN	--	--	--	--	--	--	--	--	--	PREDICTED: uncharacterized protein LOC104228044 [Nicotiana sylvestris]
23	Novel00167	38.131	189.202	-2.3109	8.9396e-09	1.2443e-07	DOWN	GO:0006796//GO:0006082//GO:0009056//GO:0019637//GO:0009987//GO:0044281//GO:0051156//GO:1901657//GO:0009185//GO:0006090//GO:0008150//GO:1901564//GO:0006757//GO:0006733//GO:0009199//GO:0006163//GO:0009126//GO:0046128//GO:0055086//GO:0016052//GO:0046034//GO:0046496//GO:0005975//GO:0009123//GO:0071704//GO:0009132//GO:0009117//GO:0006725//GO:0032787//GO:0006793//GO:0009141//GO:0009144//GO:0046939//GO:…	phosphate-containing compound metabolic process//organic acid metabolic process//catabolic process//organophosphate metabolic process//cellular process//small molecule metabolic process//glucose 6-phosphate metabolic process//glycosyl compound metabolic process//ribonucleoside diphosphate metabolic process//pyruvate metabolic process//biological_process//organonitrogen compound metabolic process/…	--	--	GO:0097159//GO:0016740//GO:1901363//GO:0030554//GO:0003824//GO:0003674//GO:0036094//GO:0004396//GO:0043167//GO:0043531//GO:0035639//GO:0032555//GO:0032550//GO:0016301//GO:0032553//GO:0005524//GO:0016773//GO:0001882//GO:0016772//GO:0000166//GO:0001883//GO:0017076//GO:0004340//GO:0097367//GO:0019200//GO:1901265//GO:0005488//GO:0032559//GO:0032549//GO:0043168	organic cyclic compound binding//transferase activity//heterocyclic compound binding//adenyl nucleotide binding//catalytic activity//molecular_function//small molecule binding//hexokinase activity//ion binding//ADP binding//purine ribonucleoside triphosphate binding//purine ribonucleotide binding//purine ribonucleoside binding//kinase activity//ribonucleotide binding//ATP binding//phosphotransfer…	no KO assigned | (RefSeq) putative late blight resistance protein homolog R1B-23	http://www.genome.jp/dbget-bin/www_bget?sot:102596100	--	PREDICTED: putative late blight resistance protein homolog R1A-3 [Nicotiana tomentosiformis]>gi|697120919|ref|XP_009614429.1| PREDICTED: putative late blight resistance protein homolog R1A-3 [Nicotiana tomentosiformis]>gi|697120921|ref|XP_009614430.1| PREDICTED: putative late blight resistance protein homolog R1A-3 [Nicotiana tomentosiformis]
24	Novel00168	1.01528	17.6014	-4.1157	0.0033386	0.011572	DOWN	GO:0006974//GO:0006950//GO:0051716//GO:0044237//GO:0006139//GO:1901360//GO:0043170//GO:0050896//GO:0006259//GO:0034641//GO:0090304//GO:0044238//GO:0046483//GO:0006310//GO:0006807//GO:0008152//GO:0006725//GO:0071704//GO:0044260//GO:0008150//GO:0006281//GO:0009987//GO:0033554	cellular response to DNA damage stimulus//response to stress//cellular response to stimulus//cellular metabolic process//nucleobase-containing compound metabolic process//organic cyclic compound metabolic process//macromolecule metabolic process//response to stimulus//DNA metabolic process//cellular nitrogen compound metabolic process//nucleic acid metabolic process//primary metabolic process//he…	--	--	GO:0043168//GO:0016817//GO:0032549//GO:0032559//GO:0005488//GO:1901265//GO:0097367//GO:0017076//GO:0001883//GO:0042578//GO:0000166//GO:0001882//GO:0003678//GO:0017111//GO:0005524//GO:0032553//GO:0016787//GO:0032550//GO:0032555//GO:0035639//GO:0043531//GO:0043167//GO:0016818//GO:0036094//GO:0003674//GO:0016791//GO:0003824//GO:0030554//GO:1901363//GO:0016788//GO:0009378//GO:0097159//GO:0004386//GO:…	anion binding//hydrolase activity, acting on acid anhydrides//ribonucleoside binding//adenyl ribonucleotide binding//binding//nucleoside phosphate binding//carbohydrate derivative binding//purine nucleotide binding//purine nucleoside binding//phosphoric ester hydrolase activity//nucleotide binding//nucleoside binding//DNA helicase activity//nucleoside-triphosphatase activity//ATP binding//ribonuc…	no KO assigned | (RefSeq) putative late blight resistance protein homolog R1A-3	http://www.genome.jp/dbget-bin/www_bget?sot:102590686	--	PREDICTED: putative late blight resistance protein homolog R1A-3 [Nicotiana sylvestris]
25	Novel00177	506.848	1187.06	-1.2278	0.00085721	0.0035864	DOWN	GO:0006793//GO:0008152//GO:0044260//GO:0071704//GO:0008150//GO:0043412//GO:0006796//GO:0009987//GO:0044237//GO:0006464//GO:0043170//GO:0016310//GO:0044267//GO:0019538//GO:0036211//GO:0006468//GO:0044238	phosphorus metabolic process//metabolic process//cellular macromolecule metabolic process//organic substance metabolic process//biological_process//macromolecule modification//phosphate-containing compound metabolic process//cellular process//cellular metabolic process//cellular protein modification process//macromolecule metabolic process//phosphorylation//cellular protein metabolic process//pro…	--	--	GO:0032555//GO:0035639//GO:0032550//GO:0016301//GO:0005524//GO:0032553//GO:0036094//GO:0003674//GO:0043167//GO:0016740//GO:1901363//GO:0030554//GO:0003824//GO:0097159//GO:0005488//GO:0032559//GO:0032549//GO:0043168//GO:0017076//GO:0097367//GO:1901265//GO:0004672//GO:0016772//GO:0001882//GO:0000166//GO:0001883//GO:0016773	purine ribonucleotide binding//purine ribonucleoside triphosphate binding//purine ribonucleoside binding//kinase activity//ATP binding//ribonucleotide binding//small molecule binding//molecular_function//ion binding//transferase activity//heterocyclic compound binding//adenyl nucleotide binding//catalytic activity//organic cyclic compound binding//binding//adenyl ribonucleotide binding//ribonucle…	no KO assigned | (RefSeq) cysteine-rich receptor-like protein kinase 2	http://www.genome.jp/dbget-bin/www_bget?sot:102594780	--	PREDICTED: cysteine-rich receptor-like protein kinase 2-like isoform X1 [Solanum tuberosum]>gi|565363586|ref|XP_006348515.1| PREDICTED: cysteine-rich receptor-like protein kinase 2-like isoform X2 [Solanum tuberosum]>gi|565363588|ref|XP_006348516.1| PREDICTED: cysteine-rich receptor-like protein kinase 2-like isoform X3 [Solanum tuberosum]>gi|565363590|ref|XP_006348517.1| PREDICTED: cysteine-rich…
26	Novel00180	41.4751	113.669	-1.4545	0.001008	0.0041288	DOWN	GO:0043170//GO:0016310//GO:0006464//GO:0044237//GO:0036211//GO:0044238//GO:0006468//GO:0019538//GO:0044267//GO:0071704//GO:0044260//GO:0008152//GO:0006793//GO:0009987//GO:0006796//GO:0043412//GO:0008150	macromolecule metabolic process//phosphorylation//cellular protein modification process//cellular metabolic process//protein modification process//primary metabolic process//protein phosphorylation//protein metabolic process//cellular protein metabolic process//organic substance metabolic process//cellular macromolecule metabolic process//metabolic process//phosphorus metabolic process//cellular …	--	--	GO:0097367//GO:1901265//GO:0017076//GO:0043168//GO:0005488//GO:0032559//GO:0032549//GO:0016773//GO:0000166//GO:0001883//GO:0004672//GO:0016772//GO:0001882//GO:0043167//GO:0036094//GO:0003674//GO:0016301//GO:0005524//GO:0032553//GO:0032555//GO:0035639//GO:0032550//GO:0097159//GO:1901363//GO:0030554//GO:0003824//GO:0016740	carbohydrate derivative binding//nucleoside phosphate binding//purine nucleotide binding//anion binding//binding//adenyl ribonucleotide binding//ribonucleoside binding//phosphotransferase activity, alcohol group as acceptor//nucleotide binding//purine nucleoside binding//protein kinase activity//transferase activity, transferring phosphorus-containing groups//nucleoside binding//ion binding//smal…	no KO assigned | (RefSeq) cysteine-rich receptor-like protein kinase 2	http://www.genome.jp/dbget-bin/www_bget?sot:102592337	--	PREDICTED: cysteine-rich receptor-like protein kinase 2-like isoform X1 [Solanum tuberosum]>gi|565363577|ref|XP_006348511.1| PREDICTED: cysteine-rich receptor-like protein kinase 2-like isoform X2 [Solanum tuberosum]
27	Novel00184	1204.55	3256.41	-1.4348	2.562e-05	0.00016242	DOWN	--	--	GO:0031224//GO:0044425//GO:0016021//GO:0016020//GO:0005575	intrinsic component of membrane//membrane part//integral component of membrane//membrane//cellular_component	GO:0043169//GO:0005488//GO:0046872//GO:0043167//GO:0003674	cation binding//binding//metal ion binding//ion binding//molecular_function	no KO assigned | (RefSeq) phospholipase SGR2	http://www.genome.jp/dbget-bin/www_bget?sot:102579534	--	PREDICTED: phospholipase DDHD2-like isoform X1 [Solanum tuberosum]>gi|565363670|ref|XP_006348556.1| PREDICTED: phospholipase DDHD2-like isoform X2 [Solanum tuberosum]>gi|565363672|ref|XP_006348557.1| PREDICTED: phospholipase DDHD2-like isoform X3 [Solanum tuberosum]>gi|565363674|ref|XP_006348558.1| PREDICTED: phospholipase DDHD2-like isoform X4 [Solanum tuberosum]>gi|565363676|ref|XP_006348559.1|…
28	Novel00186	16.947	95.8381	-2.4996	1.554e-06	1.3249e-05	DOWN	GO:1901362//GO:0080090//GO:0051171//GO:0009987//GO:0019438//GO:2000112//GO:0008150//GO:0031326//GO:0006355//GO:0050789//GO:0031323//GO:0044249//GO:0009889//GO:0006725//GO:0097659//GO:0071704//GO:0006351//GO:0034645//GO:0044260//GO:1901576//GO:2001141//GO:0008152//GO:0051252//GO:1903506//GO:0090304//GO:0046483//GO:0044238//GO:0009058//GO:0006807//GO:0010467//GO:0060255//GO:0010556//GO:0034654//GO:…	organic cyclic compound biosynthetic process//regulation of primary metabolic process//regulation of nitrogen compound metabolic process//cellular process//aromatic compound biosynthetic process//regulation of cellular macromolecule biosynthetic process//biological_process//regulation of cellular biosynthetic process//regulation of transcription, DNA-templated//regulation of biological process//r…	GO:0043226//GO:0043227//GO:0043231//GO:0005575//GO:0044464//GO:0005634//GO:0005622//GO:0005623//GO:0043229//GO:0044424	organelle//membrane-bounded organelle//intracellular membrane-bounded organelle//cellular_component//cell part//nucleus//intracellular//cell//intracellular organelle//intracellular part	GO:0003700//GO:0003674	DNA-binding transcription factor activity//molecular_function	no KO assigned | (RefSeq) centlein	http://www.genome.jp/dbget-bin/www_bget?sot:102590487	--	PREDICTED: centlein-like [Nicotiana tomentosiformis]
29	Novel00187	192.951	787.267	-2.0286	2.7652e-13	8.7706e-12	DOWN	--	--	--	--	--	--	no KO assigned | (RefSeq) pentatricopeptide repeat-containing protein At2g01390-like	http://www.genome.jp/dbget-bin/www_bget?sot:102595430	--	PREDICTED: pentatricopeptide repeat-containing protein At2g01390-like isoform X1 [Solanum tuberosum]>gi|565402130|ref|XP_006366542.1| PREDICTED: pentatricopeptide repeat-containing protein At2g01390-like isoform X2 [Solanum tuberosum]
30	Novel00192	72.2195	148.279	-1.0379	0.0078171	0.023982	DOWN	--	--	--	--	--	--	--	--	--	--
31	Novel00194	2.22419	24.4394	-3.4579	0.001957	0.0073349	DOWN	--	--	--	--	--	--	no KO assigned | (RefSeq) uncharacterized LOC102596676	http://www.genome.jp/dbget-bin/www_bget?sot:102596676	--	PREDICTED: uncharacterized protein LOC102596676 [Solanum tuberosum]
32	Novel00198	569.66	3597.38	-2.6588	2.7403e-05	0.00017251	DOWN	--	--	--	--	GO:0003824//GO:0008289//GO:0043167//GO:0003674//GO:0005543//GO:0035091//GO:0043168//GO:0005488	catalytic activity//lipid binding//ion binding//molecular_function//phospholipid binding//phosphatidylinositol binding//anion binding//binding	K01115 phospholipase D1/2 [EC:3.1.4.4] | (RefSeq) phospholipase D zeta 1-like	http://www.genome.jp/dbget-bin/www_bget?sot:102597975	--	PREDICTED: phospholipase D p1-like isoform X2 [Solanum tuberosum]
33	Novel00201	17.9779	54.2579	-1.5936	0.016282	0.044794	DOWN	GO:0044238//GO:0046483//GO:0090304//GO:0006807//GO:0050896//GO:0034641//GO:0006259//GO:0043170//GO:0044237//GO:0051716//GO:0006950//GO:0006974//GO:0006139//GO:1901360//GO:0009987//GO:0006281//GO:0033554//GO:0008150//GO:0071704//GO:0006725//GO:0044260//GO:0008152	primary metabolic process//heterocycle metabolic process//nucleic acid metabolic process//nitrogen compound metabolic process//response to stimulus//cellular nitrogen compound metabolic process//DNA metabolic process//macromolecule metabolic process//cellular metabolic process//cellular response to stimulus//response to stress//cellular response to DNA damage stimulus//nucleobase-containing compo…	--	--	--	--	no KO assigned | (RefSeq) uncharacterized LOC102599229	http://www.genome.jp/dbget-bin/www_bget?sot:102599229	--	PREDICTED: uncharacterized protein LOC101251608 [Solanum lycopersicum]
34	Novel00202	83.3915	197.247	-1.242	0.00088006	0.003667	DOWN	GO:1903047//GO:0008152//GO:0015979//GO:1901576//GO:0044260//GO:0022900//GO:0071704//GO:0000075//GO:0034645//GO:0012501//GO:0006725//GO:0043067//GO:0050789//GO:0044249//GO:0045786//GO:0008150//GO:0007093//GO:0048519//GO:0000278//GO:0006260//GO:0006915//GO:0010941//GO:0055114//GO:0016265//GO:0009987//GO:0042981//GO:0006139//GO:1901360//GO:0008219//GO:0022402//GO:0044237//GO:0009059//GO:0009772//GO:…	mitotic cell cycle process//metabolic process//photosynthesis//organic substance biosynthetic process//cellular macromolecule metabolic process//electron transport chain//organic substance metabolic process//cell cycle checkpoint//cellular macromolecule biosynthetic process//programmed cell death//cellular aromatic compound metabolic process//regulation of programmed cell death//regulation of bio…	GO:0000776//GO:0005575//GO:0032991//GO:0098687//GO:0000775//GO:0043226//GO:0043232//GO:0044424//GO:0043229//GO:0044446//GO:0044422//GO:0005694//GO:0044427//GO:0043228//GO:0005623//GO:0005622//GO:0044464	kinetochore//cellular_component//protein-containing complex//chromosomal region//chromosome, centromeric region//organelle//intracellular non-membrane-bounded organelle//intracellular part//intracellular organelle//intracellular organelle part//organelle part//chromosome//chromosomal part//non-membrane-bounded organelle//cell//intracellular//cell part	GO:0009055//GO:0008270//GO:0003674//GO:0043167//GO:0005488//GO:0046872//GO:0045156//GO:0046914//GO:0005515//GO:0043169	electron transfer activity//zinc ion binding//molecular_function//ion binding//binding//metal ion binding//electron transporter, transferring electrons within the cyclic electron transport pathway of photosynthesis activity//transition metal ion binding//protein binding//cation binding	--	--	--	PREDICTED: uncharacterized protein LOC104720402 [Camelina sativa]
35	Novel00215	421.693	1299.23	-1.6234	1.0042e-08	1.3802e-07	DOWN	--	--	--	--	--	--	no KO assigned | (RefSeq) uncharacterized LOC102599841	http://www.genome.jp/dbget-bin/www_bget?sot:102599841	--	PREDICTED: uncharacterized protein LOC104117646, partial [Nicotiana tomentosiformis]
36	Novel00220	7.55392	53.966	-2.8368	0.0026773	0.0095915	DOWN	--	--	--	--	--	--	no KO assigned | (RefSeq) uncharacterized LOC102598401	http://www.genome.jp/dbget-bin/www_bget?sot:102598401	--	PREDICTED: uncharacterized protein LOC105961778 [Erythranthe guttatus]
37	Novel00225	114.337	1259.51	-3.4615	2.8796e-12	7.7088e-11	DOWN	--	--	--	--	GO:0003676//GO:1901363//GO:0003824//GO:0030554//GO:0097159//GO:0035639//GO:0032555//GO:0016787//GO:0032550//GO:0032553//GO:0005524//GO:0003674//GO:0036094//GO:0043167//GO:0001882//GO:0000166//GO:0003677//GO:0001883//GO:0005515//GO:0005488//GO:0032549//GO:0032559//GO:0043168//GO:0017076//GO:0097367//GO:1901265	nucleic acid binding//heterocyclic compound binding//catalytic activity//adenyl nucleotide binding//organic cyclic compound binding//purine ribonucleoside triphosphate binding//purine ribonucleotide binding//hydrolase activity//purine ribonucleoside binding//ribonucleotide binding//ATP binding//molecular_function//small molecule binding//ion binding//nucleoside binding//nucleotide binding//DNA bi…	K12823 ATP-dependent RNA helicase DDX5/DBP2 [EC:3.6.4.13] | (RefSeq) DEAD-box ATP-dependent RNA helicase 46-like	http://www.genome.jp/dbget-bin/www_bget?sot:102584978	--	PREDICTED: DEAD-box ATP-dependent RNA helicase 40-like [Solanum tuberosum]
38	Novel00226	7.61512	39.4306	-2.3724	0.0020289	0.0075536	DOWN	--	--	--	--	--	--	K18857 alcohol dehydrogenase class-P [EC:1.1.1.1] | (RefSeq) alcohol dehydrogenase 1	http://www.genome.jp/dbget-bin/www_bget?sot:102597889	--	alcohol dehydrogenase, partial [Solanum habrochaites]
39	Novel00247	0	11.3492	#NAME?	0.00418	0.014022	DOWN	--	--	--	--	--	--	no KO assigned | (RefSeq) uncharacterized LOC102595311	http://www.genome.jp/dbget-bin/www_bget?sot:102595311	--	PREDICTED: uncharacterized protein LOC104212668 [Nicotiana sylvestris]
40	Novel00248	441.987	958.706	-1.1171	1.1909e-05	8.1804e-05	DOWN	GO:0006793//GO:0008152//GO:0044260//GO:0071704//GO:0008150//GO:0043412//GO:0006796//GO:0009987//GO:0044237//GO:0006464//GO:0043170//GO:0016310//GO:0044267//GO:0019538//GO:0036211//GO:0044238//GO:0006468	phosphorus metabolic process//metabolic process//cellular macromolecule metabolic process//organic substance metabolic process//biological_process//macromolecule modification//phosphate-containing compound metabolic process//cellular process//cellular metabolic process//cellular protein modification process//macromolecule metabolic process//phosphorylation//cellular protein metabolic process//pro…	--	--	GO:0032555//GO:0035639//GO:0032550//GO:0016301//GO:0005524//GO:0032553//GO:0036094//GO:0003674//GO:0043167//GO:0016740//GO:1901363//GO:0030554//GO:0003824//GO:0097159//GO:0005488//GO:0032559//GO:0032549//GO:0043168//GO:0017076//GO:0097367//GO:1901265//GO:0004672//GO:0016772//GO:0001882//GO:0000166//GO:0001883//GO:0016773//GO:0005515	purine ribonucleotide binding//purine ribonucleoside triphosphate binding//purine ribonucleoside binding//kinase activity//ATP binding//ribonucleotide binding//small molecule binding//molecular_function//ion binding//transferase activity//heterocyclic compound binding//adenyl nucleotide binding//catalytic activity//organic cyclic compound binding//binding//adenyl ribonucleotide binding//ribonucle…	no KO assigned | (RefSeq) serine/threonine-protein kinase STY8-like	http://www.genome.jp/dbget-bin/www_bget?sot:102601250	--	PREDICTED: dual specificity protein kinase splA-like isoform X1 [Solanum tuberosum]
41	Novel00256	2.09252	22.3115	-3.4145	0.0086063	0.026014	DOWN	--	--	--	--	--	--	--	--	--	--
42	Novel00262	45.0637	166.776	-1.8879	2.6986e-06	2.1683e-05	DOWN	GO:0009767//GO:0019684//GO:0006091//GO:0044267//GO:1901575//GO:0019538//GO:0044238//GO:0044237//GO:0044257//GO:0043170//GO:0008150//GO:0019941//GO:0055114//GO:0009056//GO:0043632//GO:0009987//GO:0006511//GO:0009057//GO:0044248//GO:0006508//GO:0044265//GO:0051603//GO:0015979//GO:0008152//GO:0044260//GO:0022900//GO:0071704//GO:0030163	photosynthetic electron transport chain//photosynthesis, light reaction//generation of precursor metabolites and energy//cellular protein metabolic process//organic substance catabolic process//protein metabolic process//primary metabolic process//cellular metabolic process//cellular protein catabolic process//macromolecule metabolic process//biological_process//modification-dependent protein cat…	GO:0009521//GO:0005623//GO:0005622//GO:0044464//GO:0044424//GO:0044425//GO:0098796//GO:0044436//GO:0009579//GO:0034357//GO:0005575//GO:0032991//GO:0016020	photosystem//cell//intracellular//cell part//intracellular part//membrane part//membrane protein complex//thylakoid part//thylakoid//photosynthetic membrane//cellular_component//protein-containing complex//membrane	GO:0044389//GO:0005515//GO:0005488//GO:0019899//GO:1901363//GO:0097159//GO:0046906//GO:0016168//GO:0003674//GO:0031625	ubiquitin-like protein ligase binding//protein binding//binding//enzyme binding//heterocyclic compound binding//organic cyclic compound binding//tetrapyrrole binding//chlorophyll binding//molecular_function//ubiquitin protein ligase binding	K03347 cullin 1 | (RefSeq) cullin-1-like	http://www.genome.jp/dbget-bin/www_bget?sot:102603346	--	cullin 1 [Vitis vinifera]
43	Novel00266	28.4244	79.4154	-1.4823	0.0039715	0.013435	DOWN	--	--	--	--	--	--	--	--	--	PREDICTED: cullin-1-like [Solanum tuberosum]
44	Novel00268	677.52	1446.37	-1.0941	8.2023e-06	5.8494e-05	DOWN	GO:0006826//GO:0000041//GO:0006810//GO:0051234//GO:0008150//GO:0015684//GO:0030001//GO:0072511//GO:0006812//GO:0006811//GO:0051179//GO:0070838	iron ion transport//transition metal ion transport//transport//establishment of localization//biological_process//ferrous iron transport//metal ion transport//divalent inorganic cation transport//cation transport//ion transport//localization//divalent metal ion transport	GO:0005575//GO:0016020//GO:0016021//GO:0044425//GO:0031224	cellular_component//membrane//integral component of membrane//membrane part//intrinsic component of membrane	GO:0036094//GO:0016818//GO:0003674//GO:0043167//GO:0032555//GO:0035639//GO:0032550//GO:0016787//GO:0005524//GO:0032553//GO:0005381//GO:0015093//GO:0016462//GO:0097159//GO:0072509//GO:0046915//GO:0022857//GO:0019001//GO:1901363//GO:0003824//GO:0030554//GO:0017076//GO:0097367//GO:1901265//GO:0005488//GO:0032549//GO:0016817//GO:0032559//GO:0043168//GO:0003924//GO:0005215//GO:0017111//GO:0046873//GO:…	small molecule binding//hydrolase activity, acting on acid anhydrides, in phosphorus-containing anhydrides//molecular_function//ion binding//purine ribonucleotide binding//purine ribonucleoside triphosphate binding//purine ribonucleoside binding//hydrolase activity//ATP binding//ribonucleotide binding//iron ion transmembrane transporter activity//ferrous iron transmembrane transporter activity//p…	no KO assigned | (RefSeq) GTP-binding protein OBGC, chloroplastic	http://www.genome.jp/dbget-bin/www_bget?sot:102595954	--	PREDICTED: uncharacterized protein LOC102595954 [Solanum tuberosum]
45	Novel00271	37.2442	249.632	-2.7447	0.0039987	0.01351	DOWN	--	--	--	--	--	--	no KO assigned | (RefSeq) uncharacterized LOC102590399	http://www.genome.jp/dbget-bin/www_bget?sot:102590399	--	PREDICTED: uncharacterized protein LOC101244900 [Solanum lycopersicum]
46	Novel00286	2241.34	4483.39	-1.0002	1.9594e-05	0.00012757	DOWN	GO:0050896//GO:0006952//GO:0034641//GO:0016070//GO:0046483//GO:0044238//GO:0090304//GO:0010467//GO:0006807//GO:0044237//GO:0006950//GO:0006139//GO:1901360//GO:0043170//GO:0008150//GO:0006396//GO:0009987//GO:0008152//GO:0071704//GO:0006725//GO:0044260	response to stimulus//defense response//cellular nitrogen compound metabolic process//RNA metabolic process//heterocycle metabolic process//primary metabolic process//nucleic acid metabolic process//gene expression//nitrogen compound metabolic process//cellular metabolic process//response to stress//nucleobase-containing compound metabolic process//organic cyclic compound metabolic process//macro…	GO:0005576//GO:0005575	extracellular region//cellular_component	GO:0000166//GO:0003677//GO:0001883//GO:0001882//GO:0003723//GO:0043168//GO:0005488//GO:0032549//GO:0032559//GO:0097367//GO:1901265//GO:0017076//GO:1901363//GO:0003676//GO:0003824//GO:0030554//GO:0097159//GO:0005524//GO:0032553//GO:0032555//GO:0035639//GO:0016787//GO:0032550//GO:0043167//GO:0036094//GO:0003674	nucleotide binding//DNA binding//purine nucleoside binding//nucleoside binding//RNA binding//anion binding//binding//ribonucleoside binding//adenyl ribonucleotide binding//carbohydrate derivative binding//nucleoside phosphate binding//purine nucleotide binding//heterocyclic compound binding//nucleic acid binding//catalytic activity//adenyl nucleotide binding//organic cyclic compound binding//ATP …	K12874 intron-binding protein aquarius | (RefSeq) intron-binding protein aquarius	http://www.genome.jp/dbget-bin/www_bget?sot:102599903	--	PREDICTED: intron-binding protein aquarius-like [Solanum tuberosum]
47	Novel00295	620.129	1279.57	-1.045	0.0008839	0.0036783	DOWN	GO:1901360//GO:0008202//GO:0006629//GO:0044238//GO:0009058//GO:0008152//GO:0071704//GO:1901576//GO:0006694//GO:0008150//GO:1901362//GO:0055114//GO:0008610	organic cyclic compound metabolic process//steroid metabolic process//lipid metabolic process//primary metabolic process//biosynthetic process//metabolic process//organic substance metabolic process//organic substance biosynthetic process//steroid biosynthetic process//biological_process//organic cyclic compound biosynthetic process//oxidation-reduction process//lipid biosynthetic process	--	--	GO:0005488//GO:0016614//GO:0016616//GO:0048037//GO:0033764//GO:0003854//GO:0003674//GO:0003824//GO:0016491//GO:0016229//GO:0050662	binding//oxidoreductase activity, acting on CH-OH group of donors//oxidoreductase activity, acting on the CH-OH group of donors, NAD or NADP as acceptor//cofactor binding//steroid dehydrogenase activity, acting on the CH-OH group of donors, NAD or NADP as acceptor//3-beta-hydroxy-delta5-steroid dehydrogenase activity//molecular_function//catalytic activity//oxidoreductase activity//steroid dehydr…	no KO assigned | (RefSeq) cinnamoyl-CoA reductase 1-like	http://www.genome.jp/dbget-bin/www_bget?sot:102579617	--	PREDICTED: cinnamoyl-CoA reductase 1-like [Solanum tuberosum]
48	Novel00305	593.225	2015.25	-1.7643	8.395e-13	2.475e-11	DOWN	GO:0008152//GO:0006351//GO:0034645//GO:0097659//GO:0071704//GO:0006725//GO:0044260//GO:1901576//GO:0019438//GO:0044249//GO:0008150//GO:0006396//GO:0009987//GO:1901362//GO:0044237//GO:0044271//GO:1901360//GO:0006139//GO:0043170//GO:0009059//GO:0018130//GO:0034654//GO:0034641//GO:0016070//GO:0032774//GO:0046483//GO:0044238//GO:0090304//GO:0010467//GO:0009058//GO:0006807	metabolic process//transcription, DNA-templated//cellular macromolecule biosynthetic process//nucleic acid-templated transcription//organic substance metabolic process//cellular aromatic compound metabolic process//cellular macromolecule metabolic process//organic substance biosynthetic process//aromatic compound biosynthetic process//cellular biosynthetic process//biological_process//RNA process…	--	--	GO:0003714//GO:0000988//GO:0003674//GO:0003824//GO:0016886//GO:0000989//GO:0003712//GO:0016874//GO:0008452	transcription corepressor activity//transcription factor activity, protein binding//molecular_function//catalytic activity//ligase activity, forming phosphoric ester bonds//transcription factor activity, transcription factor binding//transcription coregulator activity//ligase activity//RNA ligase activity	no KO assigned | (RefSeq) protein SCAI	http://www.genome.jp/dbget-bin/www_bget?sot:102598970	--	PREDICTED: protein SCAI-like [Solanum tuberosum]
49	Novel00311	4.27419	68.4169	-4.0006	0.0089543	0.026909	DOWN	GO:0008152//GO:0032787//GO:0071704//GO:1901576//GO:0006631//GO:0044283//GO:0044249//GO:0008150//GO:0009987//GO:0044281//GO:0006082//GO:0008610//GO:0072330//GO:0055114//GO:0016053//GO:0044237//GO:0044255//GO:0046394//GO:0019752//GO:0006633//GO:0006629//GO:0044238//GO:0043436//GO:0009058	metabolic process//monocarboxylic acid metabolic process//organic substance metabolic process//organic substance biosynthetic process//fatty acid metabolic process//small molecule biosynthetic process//cellular biosynthetic process//biological_process//cellular process//small molecule metabolic process//organic acid metabolic process//lipid biosynthetic process//monocarboxylic acid biosynthetic p…	--	--	GO:0005506//GO:0043167//GO:0003674//GO:0003824//GO:0016491//GO:0005488//GO:0046872//GO:0043169//GO:0046914	iron ion binding//ion binding//molecular_function//catalytic activity//oxidoreductase activity//binding//metal ion binding//cation binding//transition metal ion binding	K15404 aldehyde decarbonylase [EC:4.1.99.5] | (RefSeq) protein ECERIFERUM 1-like	http://www.genome.jp/dbget-bin/www_bget?sot:102579884	--	PREDICTED: protein ECERIFERUM 1-like isoform X1 [Solanum tuberosum]
50	Novel00317	220.323	671.865	-1.6085	5.1621e-09	7.516e-08	DOWN	GO:0008150//GO:0009987//GO:0016032//GO:0044403//GO:0051704//GO:0044419//GO:0044764	biological_process//cellular process//viral process//symbiont process//multi-organism process//interspecies interaction between organisms//multi-organism cellular process	--	--	--	--	no KO assigned | (RefSeq) uncharacterized LOC102585598	http://www.genome.jp/dbget-bin/www_bget?sot:102585598	--	PREDICTED: uncharacterized protein LOC102585598 [Solanum tuberosum]
51	Novel00318	4804.07	11715	-1.286	3.9518e-05	0.00023865	DOWN	GO:0007031//GO:0071840//GO:0006996//GO:0016043//GO:0008150//GO:0009987	peroxisome organization//cellular component organization or biogenesis//organelle organization//cellular component organization//biological_process//cellular process	GO:0042579//GO:0044424//GO:0043229//GO:0005623//GO:0044444//GO:0005622//GO:0044464//GO:0005737//GO:0043231//GO:0005575//GO:0043227//GO:0005777//GO:0043226	microbody//intracellular part//intracellular organelle//cell//cytoplasmic part//intracellular//cell part//cytoplasm//intracellular membrane-bounded organelle//cellular_component//membrane-bounded organelle//peroxisome//organelle	GO:0005488//GO:0032559//GO:0032549//GO:0043168//GO:0017076//GO:0097367//GO:1901265//GO:0001882//GO:0000166//GO:0001883//GO:0032555//GO:0035639//GO:0032550//GO:0005524//GO:0032553//GO:0036094//GO:0003674//GO:0043167//GO:1901363//GO:0030554//GO:0097159	binding//adenyl ribonucleotide binding//ribonucleoside binding//anion binding//purine nucleotide binding//carbohydrate derivative binding//nucleoside phosphate binding//nucleoside binding//nucleotide binding//purine nucleoside binding//purine ribonucleotide binding//purine ribonucleoside triphosphate binding//purine ribonucleoside binding//ATP binding//ribonucleotide binding//small molecule bindi…	K12604 CCR4-NOT transcription complex subunit 1 | (RefSeq) CCR4-NOT transcription complex subunit 1	http://www.genome.jp/dbget-bin/www_bget?sot:102583960	--	PREDICTED: CCR4-NOT transcription complex subunit 1-like [Solanum tuberosum]
52	Novel00319	2101.31	6215.03	-1.5645	0.00032112	0.0015315	DOWN	--	--	GO:0005575//GO:0005576	cellular_component//extracellular region	GO:0043167//GO:0061134//GO:0003674//GO:0030234//GO:0004866//GO:0004867//GO:0004857//GO:0046872//GO:0030414//GO:0098772//GO:0005488//GO:0043169//GO:0061135	ion binding//peptidase regulator activity//molecular_function//enzyme regulator activity//endopeptidase inhibitor activity//serine-type endopeptidase inhibitor activity//enzyme inhibitor activity//metal ion binding//peptidase inhibitor activity//molecular function regulator//binding//cation binding//endopeptidase regulator activity	K01476 arginase [EC:3.5.3.1] | (RefSeq) arginase 1, mitochondrial	http://www.genome.jp/dbget-bin/www_bget?sot:102601935	--	PREDICTED: arginase 1, mitochondrial-like isoform X1 [Solanum tuberosum]>gi|565362291|ref|XP_006347882.1| PREDICTED: arginase 1, mitochondrial-like isoform X2 [Solanum tuberosum]
53	Novel00320	35.7839	181.789	-2.3449	5.9807e-06	4.3993e-05	DOWN	--	--	--	--	GO:0043169//GO:0046872//GO:0005488//GO:0003674//GO:0043167	cation binding//metal ion binding//binding//molecular_function//ion binding	K01476 arginase [EC:3.5.3.1] | (RefSeq) arginase 1, mitochondrial-like	http://www.genome.jp/dbget-bin/www_bget?sot:102601598	--	PREDICTED: arginase 1, mitochondrial-like [Solanum tuberosum]
54	Novel00322	81.5074	368.043	-2.1749	1.9542e-11	4.5718e-10	DOWN	--	--	--	--	GO:0003674//GO:0005515//GO:0005488	molecular_function//protein binding//binding	K01115 phospholipase D1/2 [EC:3.1.4.4] | (RefSeq) phospholipase D gamma 1-like	http://www.genome.jp/dbget-bin/www_bget?sot:102599532	--	PREDICTED: phospholipase D beta 1-like [Solanum tuberosum]
55	Novel00327	2801.98	5844.36	-1.0606	4.7415e-06	3.591e-05	DOWN	--	--	--	--	GO:0003674//GO:0097159//GO:1901363//GO:0003676//GO:0005488//GO:0005515//GO:0003677	molecular_function//organic cyclic compound binding//heterocyclic compound binding//nucleic acid binding//binding//protein binding//DNA binding	K12862 pleiotropic regulator 1 | (RefSeq) protein pleiotropic regulatory locus 1-like	http://www.genome.jp/dbget-bin/www_bget?sot:102589483	--	PREDICTED: protein pleiotropic regulatory locus 1-like [Solanum tuberosum]
56	Novel00339	61.2954	407.753	-2.7338	1.5818e-16	8.2967e-15	DOWN	GO:0019438//GO:0006979//GO:0044249//GO:0008150//GO:0072507//GO:0042221//GO:0055082//GO:0006810//GO:0051234//GO:0009987//GO:0019725//GO:1901362//GO:0006796//GO:0098771//GO:0019637//GO:0033554//GO:0008152//GO:0042592//GO:0034599//GO:0006793//GO:0006383//GO:0097659//GO:0071704//GO:0048878//GO:0006351//GO:0034645//GO:0006650//GO:0006725//GO:0044260//GO:1901576//GO:0065008//GO:0006875//GO:0050896//GO:…	aromatic compound biosynthetic process//response to oxidative stress//cellular biosynthetic process//biological_process//divalent inorganic cation homeostasis//response to chemical//cellular chemical homeostasis//transport//establishment of localization//cellular process//cellular homeostasis//organic cyclic compound biosynthetic process//phosphate-containing compound metabolic process//inorganic…	GO:0005783//GO:0043226//GO:0042175//GO:0061695//GO:0044451//GO:0005737//GO:1902494//GO:0005789//GO:0030880//GO:0043233//GO:1990234//GO:0098588//GO:0032991//GO:0043227//GO:0016020//GO:0070013//GO:0005575//GO:0005666//GO:0043231//GO:0005623//GO:0044444//GO:0055029//GO:0044432//GO:0044464//GO:0031224//GO:0012505//GO:0031974//GO:0000428//GO:0005622//GO:0005634//GO:0044424//GO:0044425//GO:0031981//GO:…	endoplasmic reticulum//organelle//nuclear outer membrane-endoplasmic reticulum membrane network//transferase complex, transferring phosphorus-containing groups//nucleoplasm part//cytoplasm//catalytic complex//endoplasmic reticulum membrane//RNA polymerase complex//organelle lumen//transferase complex//bounding membrane of organelle//protein-containing complex//membrane-bounded organelle//membrane…	GO:0003676//GO:1901363//GO:0005217//GO:0003824//GO:0022857//GO:0016740//GO:0022803//GO:0070011//GO:0097159//GO:0072509//GO:0005219//GO:0005262//GO:0016301//GO:0015267//GO:0016787//GO:0004175//GO:0022834//GO:0005216//GO:0043167//GO:0022836//GO:0003674//GO:0016779//GO:0015278//GO:0034062//GO:0003677//GO:0008324//GO:0015075//GO:0022890//GO:0016772//GO:0005261//GO:0015276//GO:0043169//GO:0070001//GO:…	nucleic acid binding//heterocyclic compound binding//intracellular ligand-gated ion channel activity//catalytic activity//transmembrane transporter activity//transferase activity//passive transmembrane transporter activity//peptidase activity, acting on L-amino acid peptides//organic cyclic compound binding//divalent inorganic cation transmembrane transporter activity//ryanodine-sensitive calcium…	K21444 poly(rC)-binding protein 3/4 | (RefSeq) flowering locus K homology domain	http://www.genome.jp/dbget-bin/www_bget?sot:102603164	--	PREDICTED: involucrin-like [Solanum tuberosum]
57	Novel00376	450.666	1452.03	-1.6879	2.5194e-11	5.7668e-10	DOWN	GO:0019538//GO:0006468//GO:0044238//GO:0036211//GO:0044267//GO:0006464//GO:0043170//GO:0016310//GO:0044237//GO:0006796//GO:0009987//GO:0008150//GO:0043412//GO:0044260//GO:0071704//GO:0006793//GO:0008152	protein metabolic process//protein phosphorylation//primary metabolic process//protein modification process//cellular protein metabolic process//cellular protein modification process//macromolecule metabolic process//phosphorylation//cellular metabolic process//phosphate-containing compound metabolic process//cellular process//biological_process//macromolecule modification//cellular macromolecule…	--	--	GO:0016773//GO:0005515//GO:0004672//GO:0001882//GO:0016772//GO:0000166//GO:0001883//GO:0017076//GO:0097367//GO:1901265//GO:0005488//GO:0032559//GO:0032549//GO:0043168//GO:0097159//GO:0016740//GO:1901363//GO:0030554//GO:0003824//GO:0003674//GO:0036094//GO:0043167//GO:0035639//GO:0032555//GO:0032550//GO:0016301//GO:0032553//GO:0005524	phosphotransferase activity, alcohol group as acceptor//protein binding//protein kinase activity//nucleoside binding//transferase activity, transferring phosphorus-containing groups//nucleotide binding//purine nucleoside binding//purine nucleotide binding//carbohydrate derivative binding//nucleoside phosphate binding//binding//adenyl ribonucleotide binding//ribonucleoside binding//anion binding//…	no KO assigned | (RefSeq) probable leucine-rich repeat receptor-like protein kinase At5g49770	http://www.genome.jp/dbget-bin/www_bget?sot:102592616	--	PREDICTED: probable leucine-rich repeat receptor-like protein kinase At5g49770-like [Solanum tuberosum]
58	Novel00377	6.44872	122.503	-4.2477	2.2928e-06	1.8757e-05	DOWN	--	--	--	--	GO:0005515//GO:0005488//GO:0003674	protein binding//binding//molecular_function	no KO assigned | (RefSeq) probable leucine-rich repeat receptor-like protein kinase At5g49770	http://www.genome.jp/dbget-bin/www_bget?sot:102592380	--	PREDICTED: probable leucine-rich repeat receptor-like protein kinase At5g49770-like, partial [Solanum tuberosum]
59	Novel00395	66.0456	163.506	-1.3078	0.00072514	0.0030975	DOWN	--	--	--	--	--	--	--	--	--	--
60	Novel00405	86.0916	379.066	-2.1385	5.0329e-11	1.0867e-09	DOWN	--	--	--	--	--	--	--	--	--	--
61	Novel00409	422.691	2125.28	-2.33	8.5524e-09	1.1977e-07	DOWN	--	--	--	--	--	--	no KO assigned | (RefSeq) QWRF motif-containing protein 3	http://www.genome.jp/dbget-bin/www_bget?sot:102593927	--	--
62	Novel00412	94.6958	217.508	-1.1997	0.018434	0.049736	DOWN	--	--	--	--	--	--	K17925 sorting nexin-13 | (RefSeq) uncharacterized LOC102591656	http://www.genome.jp/dbget-bin/www_bget?sot:102591656	--	PREDICTED: uncharacterized protein LOC102591656 isoform X2 [Solanum tuberosum]>gi|565359390|ref|XP_006346498.1| PREDICTED: uncharacterized protein LOC102591656 isoform X3 [Solanum tuberosum]
63	Novel00413	163.988	409.118	-1.3189	1.1055e-05	7.6576e-05	DOWN	--	--	--	--	GO:0097159//GO:0003676//GO:1901363//GO:0003674//GO:0003677//GO:0005488	organic cyclic compound binding//nucleic acid binding//heterocyclic compound binding//molecular_function//DNA binding//binding	no KO assigned | (RefSeq) B3 domain-containing transcription factor VRN1-like	http://www.genome.jp/dbget-bin/www_bget?sot:102594261	--	PREDICTED: B3 domain-containing transcription factor VRN1-like [Solanum tuberosum]
64	Novel00414	1347.63	4046.12	-1.5861	6.9271e-06	5.0294e-05	DOWN	GO:0016071//GO:0044265//GO:0051252//GO:0008152//GO:1903506//GO:0006793//GO:0006351//GO:0034645//GO:0097659//GO:0071704//GO:0006725//GO:2001141//GO:0044260//GO:1901576//GO:0046700//GO:0019439//GO:0006402//GO:0019438//GO:0009889//GO:0006401//GO:0031323//GO:0044249//GO:0050789//GO:0044270//GO:0006355//GO:0008150//GO:0031326//GO:2000112//GO:0051171//GO:0009987//GO:0080090//GO:0009057//GO:0044248//GO:…	mRNA metabolic process//cellular macromolecule catabolic process//regulation of RNA metabolic process//metabolic process//regulation of nucleic acid-templated transcription//phosphorus metabolic process//transcription, DNA-templated//cellular macromolecule biosynthetic process//nucleic acid-templated transcription//organic substance metabolic process//cellular aromatic compound metabolic process/…	GO:0005737//GO:0005575//GO:0044424//GO:0005623//GO:0044464//GO:0005622	cytoplasm//cellular_component//intracellular part//cell//cell part//intracellular	GO:0016301//GO:0016757//GO:0003674//GO:0003676//GO:1901363//GO:0003824//GO:0016740//GO:0097159//GO:0005488//GO:0008144//GO:0003677//GO:0004672//GO:0016772//GO:0004674//GO:0005515//GO:0016773	kinase activity//transferase activity, transferring glycosyl groups//molecular_function//nucleic acid binding//heterocyclic compound binding//catalytic activity//transferase activity//organic cyclic compound binding//binding//drug binding//DNA binding//protein kinase activity//transferase activity, transferring phosphorus-containing groups//protein serine/threonine kinase activity//protein bindin…	K08873 serine/threonine-protein kinase SMG1 [EC:2.7.11.1] | (RefSeq) serine/threonine-protein kinase SMG1-like	http://www.genome.jp/dbget-bin/www_bget?sot:102596311	--	PREDICTED: serine/threonine-protein kinase SMG1-like isoform X1 [Solanum tuberosum]>gi|565359420|ref|XP_006346507.1| PREDICTED: serine/threonine-protein kinase SMG1-like isoform X2 [Solanum tuberosum]>gi|565359422|ref|XP_006346508.1| PREDICTED: serine/threonine-protein kinase SMG1-like isoform X3 [Solanum tuberosum]
65	Novel00415	0	30.2785	#NAME?	0.00037266	0.001742	DOWN	--	--	--	--	--	--	no KO assigned | (RefSeq) uncharacterized LOC102600017	http://www.genome.jp/dbget-bin/www_bget?sot:102600017	--	PREDICTED: uncharacterized protein LOC102600017 [Solanum tuberosum]
66	Novel00421	32.5428	103.652	-1.6713	0.011054	0.032163	DOWN	--	--	--	--	GO:0005488//GO:0005515//GO:0016773//GO:0004674//GO:0016772//GO:0004672//GO:0003674//GO:0016301//GO:0016740//GO:0003824	binding//protein binding//phosphotransferase activity, alcohol group as acceptor//protein serine/threonine kinase activity//transferase activity, transferring phosphorus-containing groups//protein kinase activity//molecular_function//kinase activity//transferase activity//catalytic activity	K06640 serine/threonine-protein kinase ATR [EC:2.7.11.1] | (RefSeq) serine/threonine-protein kinase ATR	http://www.genome.jp/dbget-bin/www_bget?sot:102598035	--	PREDICTED: serine/threonine-protein kinase ATR-like [Solanum tuberosum]
67	Novel00429	9.78114	51.4208	-2.3943	0.0004321	0.0019815	DOWN	--	--	--	--	--	--	no KO assigned | (RefSeq) uncharacterized LOC102596342	http://www.genome.jp/dbget-bin/www_bget?sot:102596342	--	PREDICTED: uncharacterized protein LOC102596342 isoform X1 [Solanum tuberosum]
68	Novel00431	214.796	599.722	-1.4813	1.9348e-06	1.6076e-05	DOWN	GO:0008152//GO:0071704//GO:0006725//GO:0044260//GO:0008150//GO:0006281//GO:0009987//GO:0033554//GO:0044237//GO:0051716//GO:0006974//GO:0006950//GO:0006139//GO:1901360//GO:0043170//GO:0050896//GO:0034641//GO:0006259//GO:0044238//GO:0046483//GO:0090304//GO:0006310//GO:0006807	metabolic process//organic substance metabolic process//cellular aromatic compound metabolic process//cellular macromolecule metabolic process//biological_process//DNA repair//cellular process//cellular response to stress//cellular metabolic process//cellular response to stimulus//cellular response to DNA damage stimulus//response to stress//nucleobase-containing compound metabolic process//organ…	--	--	GO:0016301//GO:0005524//GO:0032553//GO:0032555//GO:0035639//GO:0043531//GO:0016787//GO:0032550//GO:0043167//GO:0016791//GO:0016818//GO:0036094//GO:0003674//GO:1901363//GO:0030554//GO:0003824//GO:0016740//GO:0016788//GO:0009378//GO:0004386//GO:0016462//GO:0097159//GO:0098519//GO:0043168//GO:0005488//GO:0032559//GO:0016817//GO:0032549//GO:0097367//GO:1901265//GO:0017076//GO:0000166//GO:0001883//GO:…	kinase activity//ATP binding//ribonucleotide binding//purine ribonucleotide binding//purine ribonucleoside triphosphate binding//ADP binding//hydrolase activity//purine ribonucleoside binding//ion binding//phosphatase activity//hydrolase activity, acting on acid anhydrides, in phosphorus-containing anhydrides//small molecule binding//molecular_function//heterocyclic compound binding//adenyl nucle…	no KO assigned | (RefSeq) putative late blight resistance protein homolog R1B-23	http://www.genome.jp/dbget-bin/www_bget?sot:102597171	--	PREDICTED: putative late blight resistance protein homolog R1A-3 [Nicotiana tomentosiformis]>gi|697120919|ref|XP_009614429.1| PREDICTED: putative late blight resistance protein homolog R1A-3 [Nicotiana tomentosiformis]>gi|697120921|ref|XP_009614430.1| PREDICTED: putative late blight resistance protein homolog R1A-3 [Nicotiana tomentosiformis]
69	Novel00432	15.4384	126.718	-3.037	0.0015573	0.0060135	DOWN	--	--	--	--	GO:0016301//GO:0005524//GO:0032553//GO:0032555//GO:0043531//GO:0035639//GO:0032550//GO:0016787//GO:0043167//GO:0016791//GO:0036094//GO:0003674//GO:1901363//GO:0030554//GO:0003824//GO:0016740//GO:0016788//GO:0097159//GO:0098519//GO:0043168//GO:0005488//GO:0032559//GO:0032549//GO:0097367//GO:1901265//GO:0017076//GO:0000166//GO:0001883//GO:0008384//GO:0042578//GO:0004672//GO:0016772//GO:0001882//GO:…	kinase activity//ATP binding//ribonucleotide binding//purine ribonucleotide binding//ADP binding//purine ribonucleoside triphosphate binding//purine ribonucleoside binding//hydrolase activity//ion binding//phosphatase activity//small molecule binding//molecular_function//heterocyclic compound binding//adenyl nucleotide binding//catalytic activity//transferase activity//hydrolase activity, acting …	no KO assigned | (RefSeq) putative late blight resistance protein homolog R1B-8	http://www.genome.jp/dbget-bin/www_bget?sot:102583364	--	PREDICTED: putative late blight resistance protein homolog R1A-3 [Nicotiana tomentosiformis]>gi|697120919|ref|XP_009614429.1| PREDICTED: putative late blight resistance protein homolog R1A-3 [Nicotiana tomentosiformis]>gi|697120921|ref|XP_009614430.1| PREDICTED: putative late blight resistance protein homolog R1A-3 [Nicotiana tomentosiformis]
70	Novel00440	93.64	3361.4	-5.1658	4.4081e-06	3.3668e-05	DOWN	GO:0008152//GO:0000375//GO:0016071//GO:0006725//GO:0071704//GO:0044260//GO:0008150//GO:0009987//GO:0006396//GO:0044237//GO:0006139//GO:1901360//GO:0008380//GO:0043170//GO:0034641//GO:0016070//GO:0000398//GO:0090304//GO:0000377//GO:0044238//GO:0046483//GO:0006807//GO:0010467//GO:0006397	metabolic process//RNA splicing, via transesterification reactions//mRNA metabolic process//cellular aromatic compound metabolic process//organic substance metabolic process//cellular macromolecule metabolic process//biological_process//cellular process//RNA processing//cellular metabolic process//nucleobase-containing compound metabolic process//organic cyclic compound metabolic process//RNA spl…	--	--	--	--	K11000 callose synthase [EC:2.4.1.-] | (RefSeq) callose synthase 9	http://www.genome.jp/dbget-bin/www_bget?sot:102590221	--	PREDICTED: callose synthase 9-like [Solanum tuberosum]
71	Novel00449	2760.9	6696.05	-1.2782	1.4131e-06	1.2213e-05	DOWN	GO:0032774//GO:0010468//GO:0065007//GO:0016070//GO:0034641//GO:0019058//GO:0060255//GO:0010556//GO:0034654//GO:0050794//GO:0018130//GO:0044267//GO:0044419//GO:0016570//GO:0061025//GO:0043933//GO:0009058//GO:0019538//GO:0007010//GO:0006807//GO:0071840//GO:0030260//GO:0006996//GO:0010467//GO:0051828//GO:0016043//GO:0052126//GO:0090304//GO:0044764//GO:0036211//GO:0046483//GO:0006325//GO:0044238//GO:…	RNA biosynthetic process//regulation of gene expression//biological regulation//RNA metabolic process//cellular nitrogen compound metabolic process//viral life cycle//regulation of macromolecule metabolic process//regulation of macromolecule biosynthetic process//nucleobase-containing compound biosynthetic process//regulation of cellular process//heterocycle biosynthetic process//cellular protein…	GO:0005623//GO:0005634//GO:0019031//GO:0005622//GO:0044464//GO:0044424//GO:0043229//GO:0036338//GO:0043226//GO:0044423//GO:0043231//GO:0005575//GO:0043227//GO:0019012	cell//nucleus//viral envelope//intracellular//cell part//intracellular part//intracellular organelle//viral membrane//organelle//virion part//intracellular membrane-bounded organelle//cellular_component//membrane-bounded organelle//virion	GO:0046914//GO:0005515//GO:0043169//GO:0005488//GO:0016407//GO:0003779//GO:0000989//GO:0016410//GO:0003712//GO:0046872//GO:0016740//GO:0016747//GO:0003824//GO:0004402//GO:0008270//GO:0034212//GO:0000988//GO:0016746//GO:0008092//GO:0061733//GO:0003674//GO:0008080//GO:0043167	transition metal ion binding//protein binding//cation binding//binding//acetyltransferase activity//actin binding//transcription factor activity, transcription factor binding//N-acyltransferase activity//transcription coregulator activity//metal ion binding//transferase activity//transferase activity, transferring acyl groups other than amino-acyl groups//catalytic activity//histone acetyltransfe…	K04498 E1A/CREB-binding protein [EC:2.3.1.48] | (RefSeq) histone acetyltransferase HAC1-like	http://www.genome.jp/dbget-bin/www_bget?sot:102601489	--	PREDICTED: histone acetyltransferase HAC1-like isoform X1 [Solanum tuberosum]
72	Novel00452	27.8038	340.94	-3.6162	4.4038e-07	4.2642e-06	DOWN	--	--	--	--	--	--	--	--	--	--
73	Novel00460	3488.35	9638.47	-1.4663	1.9599e-10	3.8154e-09	DOWN	GO:0008150//GO:0050789//GO:0023052//GO:0061024//GO:0009987//GO:0051641//GO:0033036//GO:0034613//GO:0065007//GO:0007213//GO:0070727//GO:0050896//GO:0050794//GO:0072657//GO:0051179//GO:0071840//GO:0007165//GO:0016043//GO:0008104//GO:0007186//GO:0051716//GO:0043113//GO:0007154	biological_process//regulation of biological process//signaling//membrane organization//cellular process//cellular localization//macromolecule localization//cellular protein localization//biological regulation//G-protein coupled acetylcholine receptor signaling pathway//cellular macromolecule localization//response to stimulus//regulation of cellular process//protein localization to membrane//loc…	--	--	GO:0043236//GO:0003674//GO:0005515//GO:0005488//GO:0050840	laminin binding//molecular_function//protein binding//binding//extracellular matrix binding	no KO assigned | (RefSeq) serrate RNA effector molecule	http://www.genome.jp/dbget-bin/www_bget?sot:102598346	--	PREDICTED: serrate RNA effector molecule-like isoform X1 [Solanum tuberosum]
74	Novel00479	3.15579	22.1878	-2.8137	0.0074315	0.022944	DOWN	GO:0034641//GO:0006259//GO:0046483//GO:0044238//GO:0090304//GO:0006807//GO:0044237//GO:0006139//GO:1901360//GO:0043170//GO:0008150//GO:0009987//GO:0008152//GO:0071704//GO:0006725//GO:0044260//GO:0015074	cellular nitrogen compound metabolic process//DNA metabolic process//heterocycle metabolic process//primary metabolic process//nucleic acid metabolic process//nitrogen compound metabolic process//cellular metabolic process//nucleobase-containing compound metabolic process//organic cyclic compound metabolic process//macromolecule metabolic process//biological_process//cellular process//metabolic p…	--	--	--	--	--	--	--	hypothetical protein VITISV_013540 [Vitis vinifera]
75	Novel00482	10.0003	88.1219	-3.1395	0.0037933	0.012937	DOWN	--	--	--	--	GO:0008270//GO:0043167//GO:0003674//GO:0043169//GO:0046914//GO:0005515//GO:0005488//GO:0046872	zinc ion binding//ion binding//molecular_function//cation binding//transition metal ion binding//protein binding//binding//metal ion binding	K10777 DNA ligase 4 [EC:6.5.1.1] | (RefSeq) DNA ligase 4	http://www.genome.jp/dbget-bin/www_bget?sot:102578397	--	PREDICTED: DNA ligase 4 isoform X1 [Tarenaya hassleriana]
76	Novel00485	208.616	518.096	-1.3124	4.5001e-06	3.4265e-05	DOWN	--	--	--	--	--	--	--	--	--	Late blight resistance protein, putative [Solanum demissum]
77	Novel00489	31.7722	116.072	-1.8692	4.6409e-05	0.00027561	DOWN	--	--	--	--	--	--	--	--	--	PREDICTED: uncharacterized protein LOC104217360 [Nicotiana sylvestris]>gi|698540837|ref|XP_009765891.1| PREDICTED: uncharacterized protein LOC104217360 [Nicotiana sylvestris]>gi|698540840|ref|XP_009765892.1| PREDICTED: uncharacterized protein LOC104217360 [Nicotiana sylvestris]>gi|698540843|ref|XP_009765893.1| PREDICTED: uncharacterized protein LOC104217360 [Nicotiana sylvestris]
78	Novel00497	21.2739	224.475	-3.3994	2.0037e-06	1.6602e-05	DOWN	--	--	--	--	--	--	--	--	--	PREDICTED: F-box/LRR-repeat protein At5g02910-like [Nicotiana sylvestris]
79	Novel00511	791.786	2853.75	-1.8497	1.3126e-05	8.9149e-05	DOWN	GO:0018130//GO:0034641//GO:0046483//GO:0009110//GO:0009058//GO:0006807//GO:0042364//GO:0006767//GO:0044237//GO:0033014//GO:0044271//GO:0009235//GO:1901360//GO:0019438//GO:0044283//GO:0008150//GO:1901564//GO:0044249//GO:1901566//GO:0044281//GO:1901362//GO:0006766//GO:0009987//GO:0008152//GO:0009236//GO:0006725//GO:0033013//GO:0071704//GO:1901576	heterocycle biosynthetic process//cellular nitrogen compound metabolic process//heterocycle metabolic process//vitamin biosynthetic process//biosynthetic process//nitrogen compound metabolic process//water-soluble vitamin biosynthetic process//water-soluble vitamin metabolic process//cellular metabolic process//tetrapyrrole biosynthetic process//cellular nitrogen compound biosynthetic process//co…	--	--	GO:0004842//GO:0019787//GO:0003824//GO:0016740//GO:0003674	ubiquitin-protein transferase activity//ubiquitin-like protein transferase activity//catalytic activity//transferase activity//molecular_function	K10589 ubiquitin-protein ligase E3 C [EC:2.3.2.26] | (RefSeq) E3 ubiquitin-protein ligase UPL6	http://www.genome.jp/dbget-bin/www_bget?sot:102590690	--	PREDICTED: E3 ubiquitin-protein ligase UPL6-like [Solanum tuberosum]
80	Novel00519	7.71657	58.2331	-2.9158	0.0033425	0.011583	DOWN	--	--	--	--	--	--	--	--	--	--
81	Novel00538	510.027	1451.42	-1.5088	0.00014572	0.0007618	DOWN	--	--	--	--	GO:0005488//GO:0005515//GO:0003674	binding//protein binding//molecular_function	no KO assigned | (RefSeq) protein SRC2-like	http://www.genome.jp/dbget-bin/www_bget?sot:102606266	--	PREDICTED: formin-A-like isoform X1 [Solanum tuberosum]>gi|565351695|ref|XP_006342790.1| PREDICTED: formin-A-like isoform X2 [Solanum tuberosum]
82	Novel00543	10.6779	54.512	-2.3519	0.00039919	0.0018515	DOWN	--	--	--	--	--	--	--	--	--	PREDICTED: uncharacterized protein LOC102597191 [Solanum tuberosum]
83	Novel00548	145.671	310.465	-1.0917	0.00046737	0.0021194	DOWN	GO:0006464//GO:0006399//GO:0043170//GO:1901360//GO:0006139//GO:0006470//GO:0044237//GO:0034470//GO:0006807//GO:0016311//GO:0019538//GO:0010467//GO:0090304//GO:0044238//GO:0046483//GO:0036211//GO:0016070//GO:0034641//GO:0044267//GO:0044260//GO:0006725//GO:0071704//GO:0006793//GO:0009451//GO:0008152//GO:0006400//GO:0006796//GO:0009987//GO:0006396//GO:0008150//GO:0034660//GO:0008033//GO:0019988//GO:…	cellular protein modification process//tRNA metabolic process//macromolecule metabolic process//organic cyclic compound metabolic process//nucleobase-containing compound metabolic process//protein dephosphorylation//cellular metabolic process//ncRNA processing//nitrogen compound metabolic process//dephosphorylation//protein metabolic process//gene expression//nucleic acid metabolic process//prima…	--	--	GO:0016893//GO:0016763//GO:0005488//GO:0004536//GO:0003723//GO:0004519//GO:0016888//GO:0042578//GO:0004725//GO:0003674//GO:0016757//GO:0016791//GO:0016787//GO:0004721//GO:0008138//GO:0004520//GO:0043399//GO:0004518//GO:0097159//GO:0016740//GO:0016788//GO:0003824//GO:0003676//GO:1901363	endonuclease activity, active with either ribo- or deoxyribonucleic acids and producing 5'-phosphomonoesters//transferase activity, transferring pentosyl groups//binding//deoxyribonuclease activity//RNA binding//endonuclease activity//endodeoxyribonuclease activity, producing 5'-phosphomonoesters//phosphoric ester hydrolase activity//protein tyrosine phosphatase activity//molecular_function//tran…	no KO assigned | (RefSeq) StDsPTP1; dual specificity protein phosphatase 1	http://www.genome.jp/dbget-bin/www_bget?sot:102596040	--	PREDICTED: dual specificity protein phosphatase 1 isoform X4 [Solanum lycopersicum]
84	Novel00553	408.748	949.905	-1.2166	2.8829e-06	2.2989e-05	DOWN	--	--	GO:0016020//GO:0005575	membrane//cellular_component	GO:0005488//GO:0016655//GO:0003677//GO:0050136//GO:0009055//GO:0003674//GO:0003954//GO:0016651//GO:0003676//GO:1901363//GO:0008137//GO:0003824//GO:0016491//GO:0043565//GO:0097159	binding//oxidoreductase activity, acting on NAD(P)H, quinone or similar compound as acceptor//DNA binding//NADH dehydrogenase (quinone) activity//electron transfer activity//molecular_function//NADH dehydrogenase activity//oxidoreductase activity, acting on NAD(P)H//nucleic acid binding//heterocyclic compound binding//NADH dehydrogenase (ubiquinone) activity//catalytic activity//oxidoreductase ac…	no KO assigned | (RefSeq) uncharacterized LOC102581386	http://www.genome.jp/dbget-bin/www_bget?sot:102581386	--	PREDICTED: uncharacterized protein LOC101260775 [Solanum lycopersicum]>gi|723662352|ref|XP_010312398.1| PREDICTED: uncharacterized protein LOC101260775 [Solanum lycopersicum]>gi|723662356|ref|XP_010312404.1| PREDICTED: uncharacterized protein LOC101260775 [Solanum lycopersicum]>gi|723662359|ref|XP_010312408.1| PREDICTED: uncharacterized protein LOC101260775 [Solanum lycopersicum]>gi|723662362|ref…
85	Novel00574	83.9134	990.806	-3.5616	7.7076e-18	4.7278e-16	DOWN	GO:0008150//GO:0009987//GO:0006396//GO:0008152//GO:0016071//GO:0006725//GO:0071704//GO:0044260//GO:0016070//GO:0034641//GO:0090304//GO:0044238//GO:0046483//GO:0006807//GO:0010467//GO:0006397//GO:0044237//GO:0006139//GO:1901360//GO:0043170	biological_process//cellular process//RNA processing//metabolic process//mRNA metabolic process//cellular aromatic compound metabolic process//organic substance metabolic process//cellular macromolecule metabolic process//RNA metabolic process//cellular nitrogen compound metabolic process//nucleic acid metabolic process//primary metabolic process//heterocycle metabolic process//nitrogen compound …	--	--	GO:0003824//GO:0016740//GO:0016746//GO:0003674	catalytic activity//transferase activity//transferase activity, transferring acyl groups//molecular_function	no KO assigned | (RefSeq) uncharacterized LOC102596742	http://www.genome.jp/dbget-bin/www_bget?sot:102596742	--	PREDICTED: microtubule-associated protein futsch-like [Solanum tuberosum]
86	Novel00575	122.334	409.594	-1.7434	1.9071e-08	2.4789e-07	DOWN	--	--	--	--	--	--	K13034 L-3-cyanoalanine synthase/ cysteine synthase [EC:2.5.1.47 4.4.1.9] | (RefSeq) PCAS-2; bifunctional L-3-cyanoalanine synthase/cysteine synthase 2, mitochondrial-like	http://www.genome.jp/dbget-bin/www_bget?sot:102601315	--	PREDICTED: bifunctional L-3-cyanoalanine synthase/cysteine synthase 2, mitochondrial [Solanum lycopersicum]
87	Novel00578	10.8219	350.247	-5.0163	4.021e-07	3.9294e-06	DOWN	GO:0050896//GO:0006259//GO:0000012//GO:0034641//GO:0090304//GO:0044238//GO:0046483//GO:0006807//GO:0006950//GO:0006974//GO:0051716//GO:0044237//GO:0006139//GO:1901360//GO:0043170//GO:0008150//GO:0009987//GO:0006281//GO:0033554//GO:0008152//GO:0006725//GO:0071704//GO:0044260	response to stimulus//DNA metabolic process//single strand break repair//cellular nitrogen compound metabolic process//nucleic acid metabolic process//primary metabolic process//heterocycle metabolic process//nitrogen compound metabolic process//response to stress//cellular response to DNA damage stimulus//cellular response to stimulus//cellular metabolic process//nucleobase-containing compound m…	GO:0005623//GO:0031224//GO:0044464//GO:0005622//GO:0005634//GO:0044425//GO:0044424//GO:0016021//GO:0043229//GO:0043226//GO:0016020//GO:0043227//GO:0005575//GO:0043231	cell//intrinsic component of membrane//cell part//intracellular//nucleus//membrane part//intracellular part//integral component of membrane//intracellular organelle//organelle//membrane//membrane-bounded organelle//cellular_component//intracellular membrane-bounded organelle	GO:0003684//GO:0003677//GO:0005488//GO:0003676//GO:1901363//GO:0097159//GO:0003674	damaged DNA binding//DNA binding//binding//nucleic acid binding//heterocyclic compound binding//organic cyclic compound binding//molecular_function	no KO assigned | (RefSeq) uncharacterized LOC102603779	http://www.genome.jp/dbget-bin/www_bget?sot:102603779	--	PREDICTED: uncharacterized protein LOC102603779 [Solanum tuberosum]
88	Novel00592	1570.47	3904.59	-1.314	2.0283e-07	2.1054e-06	DOWN	--	--	--	--	GO:0003723//GO:0005515//GO:0046983//GO:0005488//GO:0097159//GO:1901363//GO:0003676//GO:0003674	RNA binding//protein binding//protein dimerization activity//binding//organic cyclic compound binding//heterocyclic compound binding//nucleic acid binding//molecular_function	no KO assigned | (RefSeq) protein ARABIDILLO 1-like	http://www.genome.jp/dbget-bin/www_bget?sot:102594444	--	PREDICTED: protein ARABIDILLO 1-like [Solanum tuberosum]
89	Novel00598	997.231	2637.46	-1.4031	5.002e-09	7.3008e-08	DOWN	GO:0055114//GO:0008150//GO:0008152	oxidation-reduction process//biological_process//metabolic process	--	--	GO:0000166//GO:0016614//GO:1901265//GO:0048037//GO:0016616//GO:0005488//GO:0051287//GO:0050662//GO:0097159//GO:1901363//GO:0003824//GO:0016491//GO:0003674//GO:0036094	nucleotide binding//oxidoreductase activity, acting on CH-OH group of donors//nucleoside phosphate binding//cofactor binding//oxidoreductase activity, acting on the CH-OH group of donors, NAD or NADP as acceptor//binding//NAD binding//coenzyme binding//organic cyclic compound binding//heterocyclic compound binding//catalytic activity//oxidoreductase activity//molecular_function//small molecule bi…	K15919 hydroxypyruvate reductase 2 | (RefSeq) glyoxylate/hydroxypyruvate reductase HPR3-like	http://www.genome.jp/dbget-bin/www_bget?sot:102603221	--	PREDICTED: glyoxylate/hydroxypyruvate reductase HPR3-like [Solanum tuberosum]
90	Novel00604	2.40159	30.2499	-3.6549	0.00025544	0.001253	DOWN	--	--	--	--	--	--	--	--	--	--
91	Novel00608	1389.34	3081.56	-1.1493	1.3699e-06	1.1885e-05	DOWN	GO:0043412//GO:0008150//GO:0009987//GO:0006796//GO:0008152//GO:0006793//GO:0071704//GO:0044260//GO:0044267//GO:0044238//GO:0006468//GO:0036211//GO:0019538//GO:0044237//GO:0043170//GO:0016310//GO:0006464	macromolecule modification//biological_process//cellular process//phosphate-containing compound metabolic process//metabolic process//phosphorus metabolic process//organic substance metabolic process//cellular macromolecule metabolic process//cellular protein metabolic process//primary metabolic process//protein phosphorylation//protein modification process//protein metabolic process//cellular me…	GO:0016020//GO:0005575	membrane//cellular_component	GO:0003676//GO:1901363//GO:0030554//GO:0003824//GO:0016740//GO:0097159//GO:0016301//GO:0032553//GO:0005524//GO:0035639//GO:0032555//GO:0032550//GO:0043167//GO:0003674//GO:0036094//GO:0003677//GO:0000166//GO:0001883//GO:0004672//GO:0001882//GO:0016772//GO:0016773//GO:0043168//GO:0005488//GO:0032559//GO:0032549//GO:0097367//GO:1901265//GO:0017076	nucleic acid binding//heterocyclic compound binding//adenyl nucleotide binding//catalytic activity//transferase activity//organic cyclic compound binding//kinase activity//ribonucleotide binding//ATP binding//purine ribonucleoside triphosphate binding//purine ribonucleotide binding//purine ribonucleoside binding//ion binding//molecular_function//small molecule binding//DNA binding//nucleotide bin…	no KO assigned | (RefSeq) CDPK-related kinase 3	http://www.genome.jp/dbget-bin/www_bget?sot:102597139	--	PREDICTED: CDPK-related kinase 3-like isoform X1 [Solanum tuberosum]>gi|565345351|ref|XP_006339760.1| PREDICTED: CDPK-related kinase 3-like isoform X2 [Solanum tuberosum]
92	Novel00609	2590.6	5479.07	-1.0806	3.6817e-06	2.8688e-05	DOWN	GO:0044237//GO:1901269//GO:0008654//GO:0043170//GO:0016310//GO:0044255//GO:0006644//GO:0006464//GO:0009245//GO:1901135//GO:0044267//GO:1901271//GO:0090407//GO:0006629//GO:0036211//GO:0044238//GO:0006468//GO:1903509//GO:0019538//GO:0046467//GO:0009058//GO:0009311//GO:0008152//GO:1901137//GO:0006793//GO:0009247//GO:0071704//GO:0005975//GO:0044260//GO:1901576//GO:0043412//GO:0044249//GO:0006664//GO:…	cellular metabolic process//lipooligosaccharide metabolic process//phospholipid biosynthetic process//macromolecule metabolic process//phosphorylation//cellular lipid metabolic process//phospholipid metabolic process//cellular protein modification process//lipid A biosynthetic process//carbohydrate derivative metabolic process//cellular protein metabolic process//lipooligosaccharide biosynthetic …	--	--	GO:0043168//GO:0005488//GO:0032549//GO:0016817//GO:0032559//GO:0097367//GO:0016758//GO:0046872//GO:1901265//GO:0017076//GO:0000166//GO:0001883//GO:0004672//GO:0016772//GO:0001882//GO:0043169//GO:0046914//GO:0005515//GO:0016773//GO:0016301//GO:0005524//GO:0032553//GO:0032555//GO:0035639//GO:0008270//GO:0032550//GO:0016787//GO:0043167//GO:0016757//GO:0036094//GO:0003674//GO:1901363//GO:0008915//GO:…	anion binding//binding//ribonucleoside binding//hydrolase activity, acting on acid anhydrides//adenyl ribonucleotide binding//carbohydrate derivative binding//transferase activity, transferring hexosyl groups//metal ion binding//nucleoside phosphate binding//purine nucleotide binding//nucleotide binding//purine nucleoside binding//protein kinase activity//transferase activity, transferring phosph…	K16279 E3 ubiquitin-protein ligase KEG [EC:2.7.11.1 2.3.2.27] | (RefSeq) E3 ubiquitin-protein ligase KEG	http://www.genome.jp/dbget-bin/www_bget?sot:102585596	--	PREDICTED: E3 ubiquitin-protein ligase KEG-like [Solanum tuberosum]
93	Novel00613	235.953	1116.99	-2.243	2.42e-15	1.055e-13	DOWN	--	--	--	--	GO:0046872//GO:0005488//GO:0043169//GO:0046914//GO:0043167//GO:0003674//GO:0008270	metal ion binding//binding//cation binding//transition metal ion binding//ion binding//molecular_function//zinc ion binding	no KO assigned | (RefSeq) protein FAR1-RELATED SEQUENCE 3-like	http://www.genome.jp/dbget-bin/www_bget?sot:102596648	--	PREDICTED: protein FAR1-RELATED SEQUENCE 3-like isoform X1 [Solanum tuberosum]>gi|565361920|ref|XP_006347700.1| PREDICTED: protein FAR1-RELATED SEQUENCE 3-like isoform X2 [Solanum tuberosum]
94	Novel00614	20.6837	218.922	-3.4039	3.1628e-08	3.9221e-07	DOWN	--	--	--	--	--	--	no KO assigned | (RefSeq) uncharacterized LOC102603844	http://www.genome.jp/dbget-bin/www_bget?sot:102603844	--	PREDICTED: uncharacterized protein LOC102603844 [Solanum tuberosum]
95	Novel00642	68.9553	177.973	-1.3679	0.00028444	0.001378	DOWN	GO:0016032//GO:0044237//GO:0044403//GO:0006323//GO:0006139//GO:1901360//GO:0043170//GO:0019072//GO:0051704//GO:0044419//GO:0019058//GO:0044085//GO:0034641//GO:1902590//GO:0006259//GO:0071103//GO:0044764//GO:0044238//GO:0046483//GO:0016043//GO:0090304//GO:0071840//GO:0022607//GO:0006996//GO:0006807//GO:0051276//GO:0008152//GO:0071704//GO:0006725//GO:0019073//GO:0044260//GO:0019068//GO:0044033//GO:…	viral process//cellular metabolic process//symbiont process//DNA packaging//nucleobase-containing compound metabolic process//organic cyclic compound metabolic process//macromolecule metabolic process//viral genome packaging//multi-organism process//interspecies interaction between organisms//viral life cycle//cellular component biogenesis//cellular nitrogen compound metabolic process//multi-orga…	--	--	--	--	no KO assigned | (RefSeq) uncharacterized LOC102591007	http://www.genome.jp/dbget-bin/www_bget?sot:102591007	--	PREDICTED: uncharacterized protein LOC104645291 [Solanum lycopersicum]
96	Novel00644	66.6272	248.912	-1.9015	0.00042053	0.0019341	DOWN	GO:0044237//GO:0055085//GO:0006139//GO:1901360//GO:0034641//GO:0046483//GO:0044238//GO:0006807//GO:0051179//GO:0008152//GO:0006725//GO:0071704//GO:0051234//GO:0006810//GO:0008150//GO:0009987	cellular metabolic process//transmembrane transport//nucleobase-containing compound metabolic process//organic cyclic compound metabolic process//cellular nitrogen compound metabolic process//heterocycle metabolic process//primary metabolic process//nitrogen compound metabolic process//localization//metabolic process//cellular aromatic compound metabolic process//organic substance metabolic proce…	GO:0044425//GO:0016021//GO:0031224//GO:0044423//GO:0019028//GO:0016020//GO:0019012//GO:0005575	membrane part//integral component of membrane//intrinsic component of membrane//virion part//viral capsid//membrane//virion//cellular_component	GO:0043168//GO:0003924//GO:0016817//GO:0032549//GO:0032559//GO:0005488//GO:1901265//GO:0097367//GO:0017076//GO:0004127//GO:0001883//GO:0005525//GO:0016887//GO:0000166//GO:0003677//GO:0016772//GO:0001882//GO:0032561//GO:0017111//GO:0019205//GO:0005524//GO:0032553//GO:0016301//GO:0016787//GO:0032550//GO:0032555//GO:0035639//GO:0043167//GO:0016818//GO:0036094//GO:0003674//GO:0003824//GO:0030554//GO:…	anion binding//GTPase activity//hydrolase activity, acting on acid anhydrides//ribonucleoside binding//adenyl ribonucleotide binding//binding//nucleoside phosphate binding//carbohydrate derivative binding//purine nucleotide binding//cytidylate kinase activity//purine nucleoside binding//GTP binding//ATPase activity//nucleotide binding//DNA binding//transferase activity, transferring phosphorus-co…	no KO assigned | (RefSeq) ABC transporter G family member 11-like	http://www.genome.jp/dbget-bin/www_bget?sot:102606102	--	PREDICTED: ABC transporter G family member 11-like [Solanum tuberosum]
97	Novel00653	37.4395	975.465	-4.7035	4.3249e-05	0.0002586	DOWN	--	--	--	--	--	--	K17906 autophagy-related protein 2 | (RefSeq) autophagy-related protein 2	http://www.genome.jp/dbget-bin/www_bget?sot:102595099	--	PREDICTED: uncharacterized protein LOC102595099 [Solanum tuberosum]
98	Novel00665	104.307	1179.48	-3.4993	7.9757e-13	2.3726e-11	DOWN	--	--	--	--	--	--	--	--	--	--
99	Novel00666	2095.72	4334.46	-1.0484	5.6586e-06	4.1925e-05	DOWN	GO:1901576//GO:0044260//GO:0043604//GO:0006520//GO:0006518//GO:0071704//GO:0034645//GO:0006419//GO:0006725//GO:0008152//GO:0043039//GO:0006082//GO:0009987//GO:0044281//GO:0043038//GO:1901566//GO:0044249//GO:1901564//GO:0008150//GO:0034660//GO:0009059//GO:0043170//GO:0006399//GO:0006139//GO:1901360//GO:0044271//GO:0043043//GO:0044237//GO:0010467//GO:0043603//GO:0006807//GO:0009058//GO:0019538//GO:…	organic substance biosynthetic process//cellular macromolecule metabolic process//amide biosynthetic process//cellular amino acid metabolic process//peptide metabolic process//organic substance metabolic process//cellular macromolecule biosynthetic process//alanyl-tRNA aminoacylation//cellular aromatic compound metabolic process//metabolic process//tRNA aminoacylation//organic acid metabolic proc…	--	--	GO:0003674//GO:0036094//GO:0004813//GO:0043167//GO:0035639//GO:0032555//GO:0032550//GO:0032553//GO:0005524//GO:0097159//GO:0004812//GO:0003676//GO:1901363//GO:0030554//GO:0003824//GO:0017076//GO:0016874//GO:0097367//GO:1901265//GO:0016875//GO:0005488//GO:0032559//GO:0032549//GO:0043168//GO:0001882//GO:0000166//GO:0001883	molecular_function//small molecule binding//alanine-tRNA ligase activity//ion binding//purine ribonucleoside triphosphate binding//purine ribonucleotide binding//purine ribonucleoside binding//ribonucleotide binding//ATP binding//organic cyclic compound binding//aminoacyl-tRNA ligase activity//nucleic acid binding//heterocyclic compound binding//adenyl nucleotide binding//catalytic activity//puri…	K01872 alanyl-tRNA synthetase [EC:6.1.1.7] | (RefSeq) alanine--tRNA ligase, chloroplastic/mitochondrial	http://www.genome.jp/dbget-bin/www_bget?sot:102579285	--	PREDICTED: probable alanine--tRNA ligase, chloroplastic isoform X1 [Solanum lycopersicum]
100	Novel00669	36.5992	409.175	-3.4828	3.9462e-23	4.4545e-21	DOWN	--	--	--	--	--	--	--	--	--	--
101	Novel00672	40.638	618.642	-3.9282	1.4359e-05	9.6449e-05	DOWN	--	--	--	--	GO:0005488//GO:0005515//GO:0003674	binding//protein binding//molecular_function	K18442 brefeldin A-inhibited guanine nucleotide-exchange protein | (RefSeq) brefeldin A-inhibited guanine nucleotide-exchange protein 1	http://www.genome.jp/dbget-bin/www_bget?sot:102590847	--	PREDICTED: brefeldin A-inhibited guanine nucleotide-exchange protein 1-like [Solanum tuberosum]
102	Novel00677	76.3343	153.789	-1.0105	0.0076586	0.023564	DOWN	--	--	--	--	--	--	K12606 CCR4-NOT transcription complex subunit 9 | (RefSeq) cell differentiation protein RCD1 homolog	http://www.genome.jp/dbget-bin/www_bget?sot:102596009	--	PREDICTED: cell differentiation protein RCD1 homolog [Solanum lycopersicum]
103	Novel00678	47.0785	135.085	-1.5207	0.00025546	0.001253	DOWN	--	--	GO:0016020//GO:0005575	membrane//cellular_component	--	--	--	--	--	--
104	Novel00695	3.4199	65.6264	-4.2623	7.5317e-05	0.00042445	DOWN	--	--	--	--	--	--	--	--	--	Polyprotein, 3'-partial, putative [Solanum demissum]
105	Novel00707	14.6244	49.8074	-1.768	0.0062634	0.019833	DOWN	--	--	--	--	--	--	--	--	--	Putative polyprotein, identical [Solanum demissum]
106	Novel00708	41.508	293.648	-2.8226	6.1711e-09	8.8806e-08	DOWN	--	--	--	--	--	--	--	--	--	--
107	Novel00709	209.252	491.224	-1.2311	2.0713e-05	0.00013418	DOWN	--	--	--	--	--	--	K05759 profilin | (RefSeq) profilin-1-like	http://www.genome.jp/dbget-bin/www_bget?sot:102579230	--	--
108	Novel00730	11.9513	57.6631	-2.2705	0.009029	0.027112	DOWN	GO:0043170//GO:1901360//GO:0006139//GO:0044237//GO:0006807//GO:0046483//GO:0044238//GO:0090304//GO:0034641//GO:0006259//GO:0044260//GO:0015074//GO:0071704//GO:0006725//GO:0008152//GO:0009987//GO:0008150	macromolecule metabolic process//organic cyclic compound metabolic process//nucleobase-containing compound metabolic process//cellular metabolic process//nitrogen compound metabolic process//heterocycle metabolic process//primary metabolic process//nucleic acid metabolic process//cellular nitrogen compound metabolic process//DNA metabolic process//cellular macromolecule metabolic process//DNA int…	--	--	--	--	no KO assigned | (RefSeq) ABC transporter G family member 35-like	http://www.genome.jp/dbget-bin/www_bget?sot:102603329	--	putative polyprotein [Solanum lycopersicum]
109	Novel00754	1498.95	3613.65	-1.2695	7.9201e-08	9.0108e-07	DOWN	--	--	--	--	--	--	--	--	--	--
110	Novel00756	70.8321	243.234	-1.7799	0.0052431	0.017003	DOWN	--	--	--	--	--	--	--	--	--	PREDICTED: putative ribonuclease H protein At1g65750-like [Solanum tuberosum]
111	Novel00758	13.6796	44.7557	-1.71	0.0094362	0.028149	DOWN	--	--	--	--	--	--	--	--	--	--
112	Novel00762	95.1572	900.829	-3.2429	0.005521	0.017771	DOWN	GO:0044237//GO:0044255//GO:0006644//GO:0046486//GO:0006629//GO:0044238//GO:0046488//GO:0008152//GO:0006793//GO:0006650//GO:0071704//GO:0008150//GO:0009987//GO:0019637//GO:0006796	cellular metabolic process//cellular lipid metabolic process//phospholipid metabolic process//glycerolipid metabolic process//lipid metabolic process//primary metabolic process//phosphatidylinositol metabolic process//metabolic process//phosphorus metabolic process//glycerophospholipid metabolic process//organic substance metabolic process//biological_process//cellular process//organophosphate me…	--	--	GO:0016307//GO:0016772//GO:0016773//GO:0016301//GO:0003674//GO:0003824//GO:0016740	phosphatidylinositol phosphate kinase activity//transferase activity, transferring phosphorus-containing groups//phosphotransferase activity, alcohol group as acceptor//kinase activity//molecular_function//catalytic activity//transferase activity	K00889 1-phosphatidylinositol-4-phosphate 5-kinase [EC:2.7.1.68] | (RefSeq) phosphatidylinositol 4-phosphate 5-kinase 9-like	http://www.genome.jp/dbget-bin/www_bget?sot:102578544	--	PREDICTED: phosphatidylinositol 4-phosphate 5-kinase 9-like [Solanum tuberosum]
113	Novel00764	124.783	475.2	-1.9291	1.2813e-10	2.5702e-09	DOWN	GO:0051179//GO:0006812//GO:0006811//GO:0055114//GO:0008150//GO:0006810//GO:0051234//GO:0030001//GO:0008152	localization//cation transport//ion transport//oxidation-reduction process//biological_process//transport//establishment of localization//metal ion transport//metabolic process	--	--	GO:0043169//GO:0046872//GO:0005488//GO:0016491//GO:0003824//GO:0003674//GO:0043167	cation binding//metal ion binding//binding//oxidoreductase activity//catalytic activity//molecular_function//ion binding	no KO assigned | (RefSeq) uncharacterized LOC102590189	http://www.genome.jp/dbget-bin/www_bget?sot:102590189	--	PREDICTED: axoneme-associated protein mst101(2)-like [Solanum tuberosum]
114	Novel00775	7.90474	79.3091	-3.3267	0.00040831	0.0018876	DOWN	--	--	--	--	GO:0005488//GO:0032559//GO:0032549//GO:0043168//GO:0017076//GO:0097367//GO:1901265//GO:0001882//GO:0000166//GO:0001883//GO:0005515//GO:0032555//GO:0043531//GO:0032550//GO:0032553//GO:0036094//GO:0003674//GO:0043167//GO:1901363//GO:0030554//GO:0097159	binding//adenyl ribonucleotide binding//ribonucleoside binding//anion binding//purine nucleotide binding//carbohydrate derivative binding//nucleoside phosphate binding//nucleoside binding//nucleotide binding//purine nucleoside binding//protein binding//purine ribonucleotide binding//ADP binding//purine ribonucleoside binding//ribonucleotide binding//small molecule binding//molecular_function//ion…	no KO assigned | (RefSeq) putative disease resistance protein RGA3	http://www.genome.jp/dbget-bin/www_bget?sot:102585712	--	PREDICTED: putative disease resistance protein RGA3-like [Solanum tuberosum]
115	Novel00780	2374.4	5926.22	-1.3196	3.2537e-05	0.00020144	DOWN	--	--	--	--	GO:0008270//GO:0043167//GO:0003674//GO:0043169//GO:0046914//GO:0005515//GO:0005488//GO:0046872	zinc ion binding//ion binding//molecular_function//cation binding//transition metal ion binding//protein binding//binding//metal ion binding	no KO assigned | (RefSeq) E3 ubiquitin-protein ligase PRT6-like	http://www.genome.jp/dbget-bin/www_bget?sot:102594606	--	PREDICTED: E3 ubiquitin-protein ligase UBR2-like isoform X3 [Solanum tuberosum]
116	Novel00785	126.636	786.848	-2.6354	1.7702e-08	2.3198e-07	DOWN	GO:0008152//GO:0055114//GO:0008150	metabolic process//oxidation-reduction process//biological_process	--	--	GO:0003674//GO:0043167//GO:0005506//GO:0046906//GO:0097159//GO:0016491//GO:0003824//GO:1901363//GO:0046872//GO:0005488//GO:0046914//GO:0043169//GO:0016705//GO:0020037	molecular_function//ion binding//iron ion binding//tetrapyrrole binding//organic cyclic compound binding//oxidoreductase activity//catalytic activity//heterocyclic compound binding//metal ion binding//binding//transition metal ion binding//cation binding//oxidoreductase activity, acting on paired donors, with incorporation or reduction of molecular oxygen//heme binding	K20618 cytochrome P450 family 76 subfamily A | (RefSeq) cytochrome P450 76A2-like	http://www.genome.jp/dbget-bin/www_bget?sot:102594375	--	PREDICTED: cytochrome P450 76A2-like [Solanum tuberosum]
117	Novel00787	86.0559	194.321	-1.1751	0.015359	0.042615	DOWN	GO:0055114//GO:0008150//GO:0008152	oxidation-reduction process//biological_process//metabolic process	--	--	GO:0097159//GO:0003824//GO:1901363//GO:0016491//GO:0043167//GO:0003674//GO:0046906//GO:0005506//GO:0043169//GO:0046914//GO:0020037//GO:0016705//GO:0046872//GO:0005488	organic cyclic compound binding//catalytic activity//heterocyclic compound binding//oxidoreductase activity//ion binding//molecular_function//tetrapyrrole binding//iron ion binding//cation binding//transition metal ion binding//heme binding//oxidoreductase activity, acting on paired donors, with incorporation or reduction of molecular oxygen//metal ion binding//binding	K20618 cytochrome P450 family 76 subfamily A | (RefSeq) cytochrome P450 76A2-like	http://www.genome.jp/dbget-bin/www_bget?sot:102595041	--	PREDICTED: cytochrome P450 76A2-like [Solanum tuberosum]
118	Novel00795	973.825	3368.59	-1.7904	1.0694e-06	9.5458e-06	DOWN	--	--	GO:0005623//GO:0005634//GO:0005622//GO:0044464//GO:0044424//GO:0043229//GO:0043226//GO:0043231//GO:0005575//GO:0043227	cell//nucleus//intracellular//cell part//intracellular part//intracellular organelle//organelle//intracellular membrane-bounded organelle//cellular_component//membrane-bounded organelle	GO:0005488//GO:1901363//GO:0003676//GO:0097159//GO:0003674	binding//heterocyclic compound binding//nucleic acid binding//organic cyclic compound binding//molecular_function	K12830 splicing factor 3B subunit 3 | (RefSeq) pre-mRNA-splicing factor prp12	http://www.genome.jp/dbget-bin/www_bget?sot:102600929	--	PREDICTED: pre-mRNA-splicing factor prp12-like isoform X1 [Solanum tuberosum]
119	Novel00802	48.9421	124.34	-1.3451	0.0014899	0.0057856	DOWN	--	--	--	--	GO:0003674//GO:0005515//GO:0046983//GO:0005488	molecular_function//protein binding//protein dimerization activity//binding	--	--	--	PREDICTED: transcription factor BIM2 [Solanum lycopersicum]
120	Novel00814	823.513	2402.58	-1.5447	1.1957e-10	2.4164e-09	DOWN	GO:0006113//GO:0051649//GO:0009064//GO:1901605//GO:0034613//GO:0071704//GO:0006520//GO:0019665//GO:0033036//GO:0043648//GO:1901565//GO:0008152//GO:1901606//GO:0046395//GO:0051641//GO:0071702//GO:0043649//GO:0008544//GO:0044281//GO:0044248//GO:0006536//GO:0009987//GO:0009056//GO:0055114//GO:0006082//GO:0046907//GO:0032502//GO:0015980//GO:0006810//GO:0051234//GO:1901564//GO:0008150//GO:0019670//GO:…	fermentation//establishment of localization in cell//glutamine family amino acid metabolic process//alpha-amino acid metabolic process//cellular protein localization//organic substance metabolic process//cellular amino acid metabolic process//anaerobic amino acid catabolic process//macromolecule localization//dicarboxylic acid metabolic process//organonitrogen compound catabolic process//metaboli…	GO:0016020//GO:0032991//GO:0005575//GO:0005737//GO:0030117//GO:0098796//GO:0044425//GO:0044424//GO:0044464//GO:0005622//GO:0044444//GO:0005623//GO:0048475	membrane//protein-containing complex//cellular_component//cytoplasm//membrane coat//membrane protein complex//membrane part//intracellular part//cell part//intracellular//cytoplasmic part//cell//coated membrane	GO:0003674//GO:0016853//GO:0003824//GO:0016866//GO:0050097	molecular_function//isomerase activity//catalytic activity//intramolecular transferase activity//methylaspartate mutase activity	no KO assigned | (RefSeq) apoptosis inhibitor 5-like	http://www.genome.jp/dbget-bin/www_bget?sot:102589398	--	PREDICTED: apoptosis inhibitor 5-like [Solanum tuberosum]
121	Novel00836	21.1228	81.8233	-1.9537	0.00024154	0.0011943	DOWN	--	--	--	--	--	--	K03453 bile acid:Na+ symporter, BASS family | (RefSeq) probable sodium/metabolite cotransporter BASS1, chloroplastic	http://www.genome.jp/dbget-bin/www_bget?sot:102606347	--	PREDICTED: probable sodium/metabolite cotransporter BASS1, chloroplastic-like [Solanum tuberosum]
122	Novel00851	90.9812	298.286	-1.7131	3.0873e-07	3.0882e-06	DOWN	GO:0008150//GO:0008152	biological_process//metabolic process	--	--	GO:0008484//GO:0003824//GO:0016788//GO:0043167//GO:0003674//GO:0016787//GO:0043169//GO:0046872//GO:0005488	sulfuric ester hydrolase activity//catalytic activity//hydrolase activity, acting on ester bonds//ion binding//molecular_function//hydrolase activity//cation binding//metal ion binding//binding	K05310 ethanolaminephosphotransferase [EC:2.7.-.-] | (RefSeq) GPI ethanolamine phosphate transferase 2	http://www.genome.jp/dbget-bin/www_bget?sot:102578451	--	PREDICTED: GPI ethanolamine phosphate transferase 3 [Solanum lycopersicum]>gi|723713250|ref|XP_010323374.1| PREDICTED: GPI ethanolamine phosphate transferase 3 [Solanum lycopersicum]>gi|723713253|ref|XP_010323375.1| PREDICTED: GPI ethanolamine phosphate transferase 3 [Solanum lycopersicum]
123	Novel00852	481.161	1281.81	-1.4136	2.3134e-08	2.9668e-07	DOWN	GO:0071704//GO:1901576//GO:0008152//GO:1901362//GO:0008610//GO:0055114//GO:0006694//GO:0008150//GO:1901360//GO:0044238//GO:0009058//GO:0008202//GO:0006629	organic substance metabolic process//organic substance biosynthetic process//metabolic process//organic cyclic compound biosynthetic process//lipid biosynthetic process//oxidation-reduction process//steroid biosynthetic process//biological_process//organic cyclic compound metabolic process//primary metabolic process//biosynthetic process//steroid metabolic process//lipid metabolic process	--	--	GO:0003674//GO:0003854//GO:0050662//GO:0003824//GO:0016491//GO:0016229//GO:0016614//GO:0016616//GO:0048037//GO:0005488//GO:0033764	molecular_function//3-beta-hydroxy-delta5-steroid dehydrogenase activity//coenzyme binding//catalytic activity//oxidoreductase activity//steroid dehydrogenase activity//oxidoreductase activity, acting on CH-OH group of donors//oxidoreductase activity, acting on the CH-OH group of donors, NAD or NADP as acceptor//cofactor binding//binding//steroid dehydrogenase activity, acting on the CH-OH group …	no KO assigned | (RefSeq) vestitone reductase-like	http://www.genome.jp/dbget-bin/www_bget?sot:102580369	--	PREDICTED: vestitone reductase-like isoform X1 [Solanum tuberosum]
124	Novel00857	26.2605	88.9062	-1.7594	0.00053455	0.0023815	DOWN	--	--	--	--	--	--	--	--	--	--
125	Novel00877	187.192	470.792	-1.3306	0.00026112	0.0012782	DOWN	GO:0008150//GO:0008152	biological_process//metabolic process	--	--	GO:0003824//GO:0016787//GO:0003674	catalytic activity//hydrolase activity//molecular_function	no KO assigned | (RefSeq) probable carboxylesterase 18	http://www.genome.jp/dbget-bin/www_bget?sot:102589536	--	PREDICTED: probable carboxylesterase 18-like [Solanum tuberosum]
126	Novel00910	13.243	61.9308	-2.2254	0.00029383	0.0014175	DOWN	GO:0008152//GO:0097659//GO:0071704//GO:0006351//GO:0034645//GO:0006725//GO:0044260//GO:1901576//GO:0030001//GO:0019438//GO:0044249//GO:0010038//GO:0008150//GO:0042221//GO:0006810//GO:0051234//GO:0009987//GO:1901362//GO:0098754//GO:0010035//GO:0000041//GO:0044237//GO:0006811//GO:0044271//GO:1901360//GO:0006139//GO:1990267//GO:0046689//GO:0006812//GO:0043170//GO:0072511//GO:0050787//GO:0009059//GO:…	metabolic process//nucleic acid-templated transcription//organic substance metabolic process//transcription, DNA-templated//cellular macromolecule biosynthetic process//cellular aromatic compound metabolic process//cellular macromolecule metabolic process//organic substance biosynthetic process//metal ion transport//aromatic compound biosynthetic process//cellular biosynthetic process//response t…	GO:0016020//GO:0005575	membrane//cellular_component	GO:0034062//GO:0003674//GO:0016779//GO:1901363//GO:0003676//GO:0003824//GO:0046915//GO:0022857//GO:0016740//GO:0015097//GO:0097159//GO:0072509//GO:0005488//GO:0003899//GO:0008324//GO:0003677//GO:0015075//GO:0022890//GO:0016772//GO:0005215//GO:0046873	5'-3' RNA polymerase activity//molecular_function//nucleotidyltransferase activity//heterocyclic compound binding//nucleic acid binding//catalytic activity//transition metal ion transmembrane transporter activity//transmembrane transporter activity//transferase activity//mercury ion transmembrane transporter activity//organic cyclic compound binding//divalent inorganic cation transmembrane transp…	--	--	--	Polyprotein, putative [Solanum demissum]
127	Novel00912	21.0438	58.9781	-1.4868	0.010057	0.029716	DOWN	GO:0008150//GO:0007276//GO:0032504//GO:0019953//GO:0048609//GO:0048232//GO:0000003//GO:0051704//GO:0022414//GO:0044703//GO:0007283//GO:0032501	biological_process//gamete generation//multicellular organism reproduction//sexual reproduction//multicellular organismal reproductive process//male gamete generation//reproduction//multi-organism process//reproductive process//multi-organism reproductive process//spermatogenesis//multicellular organismal process	GO:0032993//GO:0043226//GO:0000785//GO:0000786//GO:0044815//GO:0043231//GO:0005575//GO:0032991//GO:0043227//GO:0005634//GO:0005622//GO:0044464//GO:0044427//GO:0043228//GO:0005623//GO:0044446//GO:0043229//GO:0044422//GO:0005694//GO:0043232//GO:0044424	protein-DNA complex//organelle//chromatin//nucleosome//DNA packaging complex//intracellular membrane-bounded organelle//cellular_component//protein-containing complex//membrane-bounded organelle//nucleus//intracellular//cell part//chromosomal part//non-membrane-bounded organelle//cell//intracellular organelle part//intracellular organelle//organelle part//chromosome//intracellular non-membrane-bo…	GO:0097159//GO:1901363//GO:0003676//GO:0003674//GO:0003677//GO:0005488	organic cyclic compound binding//heterocyclic compound binding//nucleic acid binding//molecular_function//DNA binding//binding	--	--	--	--
128	Novel00913	10.6277	38.8451	-1.8699	0.0098547	0.029225	DOWN	--	--	--	--	--	--	--	--	--	--
129	Novel00923	96.903	717.521	-2.8884	1.0929e-05	7.5829e-05	DOWN	GO:0051252//GO:0008152//GO:1903506//GO:0006725//GO:0006351//GO:0034645//GO:0071704//GO:0097659//GO:0010605//GO:1902679//GO:2001141//GO:1901576//GO:0044260//GO:0019438//GO:0051253//GO:0006355//GO:0031326//GO:0008150//GO:0006357//GO:2000112//GO:0009889//GO:0031323//GO:0009890//GO:0044249//GO:0050789//GO:0080090//GO:1901362//GO:0051171//GO:0009987//GO:0010558//GO:2000113//GO:1903507//GO:0048519//GO:…	regulation of RNA metabolic process//metabolic process//regulation of nucleic acid-templated transcription//cellular aromatic compound metabolic process//transcription, DNA-templated//cellular macromolecule biosynthetic process//organic substance metabolic process//nucleic acid-templated transcription//negative regulation of macromolecule metabolic process//negative regulation of RNA biosynthetic…	GO:0005737//GO:0043227//GO:0005575//GO:0043231//GO:0043226//GO:0044424//GO:0043229//GO:0005623//GO:0044464//GO:0005622//GO:0005634	cytoplasm//membrane-bounded organelle//cellular_component//intracellular membrane-bounded organelle//organelle//intracellular part//intracellular organelle//cell//cell part//intracellular//nucleus	GO:0019210//GO:0030234//GO:0016538//GO:0017069//GO:0003674//GO:0003676//GO:1901363//GO:0019887//GO:0097159//GO:0098772//GO:0019207//GO:0005488//GO:0004857//GO:0030291//GO:0004860//GO:0004861//GO:0003723	kinase inhibitor activity//enzyme regulator activity//cyclin-dependent protein serine/threonine kinase regulator activity//snRNA binding//molecular_function//nucleic acid binding//heterocyclic compound binding//protein kinase regulator activity//organic cyclic compound binding//molecular function regulator//kinase regulator activity//binding//enzyme inhibitor activity//protein serine/threonine ki…	--	--	--	PREDICTED: uncharacterized protein LOC101258014 [Solanum lycopersicum]
130	Novel00926	12.2301	49.7924	-2.0255	0.0021469	0.0079256	DOWN	--	--	--	--	--	--	no KO assigned | (RefSeq) calmodulin-interacting protein 111	http://www.genome.jp/dbget-bin/www_bget?sot:102580712	--	PREDICTED: calmodulin-interacting protein 111-like isoform X5 [Solanum tuberosum]
131	Novel00936	26.1753	334.227	-3.6745	2.9629e-22	3.1192e-20	DOWN	--	--	--	--	--	--	K06171 nicastrin | (RefSeq) nicastrin	http://www.genome.jp/dbget-bin/www_bget?sot:102593488	--	PREDICTED: nicastrin-like isoform X1 [Solanum tuberosum]
132	Novel00938	37.9203	612.996	-4.0148	0.0001291	0.00068297	DOWN	GO:2000112//GO:0031326//GO:0008150//GO:0051234//GO:0006355//GO:0006810//GO:0050789//GO:0031323//GO:0044249//GO:0009889//GO:0019079//GO:0019438//GO:0023052//GO:1901362//GO:0080090//GO:0051171//GO:0009987//GO:1903506//GO:0008152//GO:0051252//GO:1901576//GO:0044260//GO:2001141//GO:0006725//GO:0071704//GO:0097659//GO:0006351//GO:0034645//GO:0010468//GO:0032774//GO:0065007//GO:0016070//GO:0034641//GO:…	regulation of cellular macromolecule biosynthetic process//regulation of cellular biosynthetic process//biological_process//establishment of localization//regulation of transcription, DNA-templated//transport//regulation of biological process//regulation of cellular metabolic process//cellular biosynthetic process//regulation of biosynthetic process//viral genome replication//aromatic compound bi…	--	--	GO:0003724//GO:0030554//GO:0003824//GO:1901363//GO:0003676//GO:0097159//GO:0004386//GO:0016462//GO:0016787//GO:0032550//GO:0032555//GO:0043531//GO:0035639//GO:0005524//GO:0032553//GO:0016818//GO:0036094//GO:0003674//GO:0043167//GO:0001882//GO:0001883//GO:0003677//GO:0016887//GO:0000166//GO:0017111//GO:0008134//GO:0005515//GO:0003723//GO:0032559//GO:0016817//GO:0032549//GO:0005488//GO:0043168//GO:…	RNA helicase activity//adenyl nucleotide binding//catalytic activity//heterocyclic compound binding//nucleic acid binding//organic cyclic compound binding//helicase activity//pyrophosphatase activity//hydrolase activity//purine ribonucleoside binding//purine ribonucleotide binding//ADP binding//purine ribonucleoside triphosphate binding//ATP binding//ribonucleotide binding//hydrolase activity, ac…	no KO assigned | (RefSeq) TMV resistance protein N-like	http://www.genome.jp/dbget-bin/www_bget?sot:102606014	--	PREDICTED: uncharacterized protein LOC101265700 [Solanum lycopersicum]
133	Novel00949	28.2848	86.267	-1.6088	0.001494	0.0057995	DOWN	--	--	--	--	--	--	--	--	--	--
134	Novel00965	1080.3	2927.8	-1.4384	2.1955e-09	3.4615e-08	DOWN	--	--	--	--	GO:0001882//GO:0001883//GO:0000166//GO:0003677//GO:0046914//GO:0005515//GO:0043169//GO:0032549//GO:0032559//GO:0005488//GO:0043168//GO:0017076//GO:1901265//GO:0097367//GO:0046872//GO:0003824//GO:0030554//GO:1901363//GO:0003676//GO:0097159//GO:0008270//GO:0032550//GO:0016787//GO:0032555//GO:0035639//GO:0005524//GO:0032553//GO:0036094//GO:0003674//GO:0043167	nucleoside binding//purine nucleoside binding//nucleotide binding//DNA binding//transition metal ion binding//protein binding//cation binding//ribonucleoside binding//adenyl ribonucleotide binding//binding//anion binding//purine nucleotide binding//nucleoside phosphate binding//carbohydrate derivative binding//metal ion binding//catalytic activity//adenyl nucleotide binding//heterocyclic compound…	no KO assigned | (RefSeq) F-box protein At3g54460	http://www.genome.jp/dbget-bin/www_bget?sot:102602511	--	PREDICTED: F-box protein At3g54460-like [Solanum tuberosum]
135	Novel00974	106.476	391.239	-1.8775	0.011853	0.034154	DOWN	--	--	--	--	--	--	--	--	--	--
136	Novel00991	158.275	1335.36	-3.0767	1.3862e-05	9.3531e-05	DOWN	--	--	GO:0005575//GO:0019012//GO:0019028//GO:0044423	cellular_component//virion//viral capsid//virion part	GO:0003674//GO:0016787//GO:0004520//GO:0004518//GO:0005198//GO:0016788//GO:0003824//GO:0016893//GO:0004519//GO:0016888//GO:0004536	molecular_function//hydrolase activity//endodeoxyribonuclease activity//nuclease activity//structural molecule activity//hydrolase activity, acting on ester bonds//catalytic activity//endonuclease activity, active with either ribo- or deoxyribonucleic acids and producing 5'-phosphomonoesters//endonuclease activity//endodeoxyribonuclease activity, producing 5'-phosphomonoesters//deoxyribonuclease …	--	--	--	hypothetical protein VITISV_002170 [Vitis vinifera]
137	Novel01001	115.352	245.661	-1.0906	0.001042	0.0042457	DOWN	--	--	--	--	--	--	no KO assigned | (RefSeq) uncharacterized LOC102603831	http://www.genome.jp/dbget-bin/www_bget?sot:102603831	--	PREDICTED: uncharacterized protein LOC104234908 [Nicotiana sylvestris]
138	Novel01002	2912.01	6931.51	-1.2512	6.4934e-08	7.5157e-07	DOWN	GO:0009987//GO:0008150//GO:0051704//GO:0016032//GO:0044403//GO:0044764//GO:0044419//GO:0019058	cellular process//biological_process//multi-organism process//viral process//symbiont process//multi-organism cellular process//interspecies interaction between organisms//viral life cycle	--	--	GO:0043167//GO:0036094//GO:0016818//GO:0003674//GO:0032553//GO:0032555//GO:0035639//GO:0032550//GO:0016787//GO:0016462//GO:0097159//GO:1901363//GO:0003824//GO:0019001//GO:0097367//GO:1901265//GO:0017076//GO:0043168//GO:0003924//GO:0005488//GO:0032549//GO:0016817//GO:0032561//GO:0017111//GO:0000166//GO:0001883//GO:0005525//GO:0001882	ion binding//small molecule binding//hydrolase activity, acting on acid anhydrides, in phosphorus-containing anhydrides//molecular_function//ribonucleotide binding//purine ribonucleotide binding//purine ribonucleoside triphosphate binding//purine ribonucleoside binding//hydrolase activity//pyrophosphatase activity//organic cyclic compound binding//heterocyclic compound binding//catalytic activity…	K17065 dynamin 1-like protein [EC:3.6.5.5] | (RefSeq) dynamin-related protein 3A-like	http://www.genome.jp/dbget-bin/www_bget?sot:102589822	--	PREDICTED: dynamin-related protein 3A-like [Solanum tuberosum]
139	Novel01005	237.397	681.835	-1.5221	3.9648e-08	4.8221e-07	DOWN	GO:0043065//GO:0042981//GO:0010942//GO:0008219//GO:0010952//GO:0044237//GO:0009893//GO:0051336//GO:0032268//GO:0043280//GO:0048518//GO:0045862//GO:0043068//GO:0030162//GO:0043170//GO:0019222//GO:0051345//GO:0065007//GO:0050794//GO:0044267//GO:0060255//GO:0052548//GO:0010467//GO:0052547//GO:0019538//GO:0044238//GO:0065009//GO:0043281//GO:0048522//GO:0006508//GO:2001056//GO:0031325//GO:0008152//GO:…	positive regulation of apoptotic process//regulation of apoptotic process//positive regulation of cell death//cell death//positive regulation of peptidase activity//cellular metabolic process//positive regulation of metabolic process//regulation of hydrolase activity//regulation of cellular protein metabolic process//positive regulation of cysteine-type endopeptidase activity involved in apoptoti…	GO:0044424//GO:0043229//GO:0005623//GO:0044444//GO:0005622//GO:0044464//GO:0005737//GO:0043231//GO:0005575//GO:0005739//GO:0043227//GO:0043226	intracellular part//intracellular organelle//cell//cytoplasmic part//intracellular//cell part//cytoplasm//intracellular membrane-bounded organelle//cellular_component//mitochondrion//membrane-bounded organelle//organelle	--	--	no KO assigned | (RefSeq) vacuolar protein sorting-associated protein 13A-like	http://www.genome.jp/dbget-bin/www_bget?sot:102596923	--	PREDICTED: putative vacuolar protein sorting-associated protein 13A-like isoform X3 [Solanum tuberosum]
140	Novel01011	399.733	3101.14	-2.9557	0.00015244	0.00079215	DOWN	GO:0006807//GO:0009058//GO:0010467//GO:0090304//GO:0046483//GO:0044238//GO:0032774//GO:0016070//GO:0006366//GO:0034641//GO:0034654//GO:0018130//GO:0009059//GO:0043170//GO:0006139//GO:1901360//GO:0044271//GO:0044237//GO:1901362//GO:0009987//GO:0008150//GO:0044249//GO:0019438//GO:1901576//GO:0044260//GO:0006725//GO:0071704//GO:0097659//GO:0006351//GO:0034645//GO:0008152	nitrogen compound metabolic process//biosynthetic process//gene expression//nucleic acid metabolic process//heterocycle metabolic process//primary metabolic process//RNA biosynthetic process//RNA metabolic process//transcription by RNA polymerase II//cellular nitrogen compound metabolic process//nucleobase-containing compound biosynthetic process//heterocycle biosynthetic process//macromolecule b…	GO:0000428//GO:0005622//GO:0005634//GO:0031974//GO:0044464//GO:0043228//GO:0005623//GO:0055029//GO:0045111//GO:0005882//GO:0044422//GO:0043229//GO:0005654//GO:0044446//GO:0044428//GO:0043232//GO:0031981//GO:0044424//GO:0061695//GO:0043226//GO:0005856//GO:0005665//GO:0044430//GO:0005575//GO:0043231//GO:0070013//GO:0043227//GO:0032991//GO:1990234//GO:0043233//GO:1902494//GO:0030880//GO:0044451//GO:…	DNA-directed RNA polymerase complex//intracellular//nucleus//membrane-enclosed lumen//cell part//non-membrane-bounded organelle//cell//nuclear DNA-directed RNA polymerase complex//intermediate filament cytoskeleton//intermediate filament//organelle part//intracellular organelle//nucleoplasm//intracellular organelle part//nuclear part//intracellular non-membrane-bounded organelle//nuclear lumen//i…	GO:0005515//GO:0043169//GO:0005200//GO:0003677//GO:0046872//GO:0005488//GO:0005198//GO:0097159//GO:0003676//GO:1901363//GO:0003674//GO:0043167	protein binding//cation binding//structural constituent of cytoskeleton//DNA binding//metal ion binding//binding//structural molecule activity//organic cyclic compound binding//nucleic acid binding//heterocyclic compound binding//molecular_function//ion binding	no KO assigned | (RefSeq) zinc finger CCCH domain-containing protein 19	http://www.genome.jp/dbget-bin/www_bget?sot:102598651	--	PREDICTED: zinc finger CCCH domain-containing protein 19-like isoform X1 [Solanum tuberosum]
141	Novel01020	1422.17	2966.43	-1.0606	7.7158e-06	5.5384e-05	DOWN	GO:0009987//GO:0061024//GO:0046907//GO:0009566//GO:0032504//GO:0006810//GO:0051234//GO:0008150//GO:0051649//GO:0034613//GO:0071704//GO:0033036//GO:0019953//GO:0051641//GO:0071702//GO:0008152//GO:0007342//GO:0006508//GO:0006886//GO:0045184//GO:0044238//GO:0016043//GO:0015031//GO:0071840//GO:0051179//GO:0019538//GO:0007338//GO:0061025//GO:0070727//GO:0000003//GO:0044703//GO:0016192//GO:0022414//GO:…	cellular process//membrane organization//intracellular transport//fertilization//multicellular organism reproduction//transport//establishment of localization//biological_process//establishment of localization in cell//cellular protein localization//organic substance metabolic process//macromolecule localization//sexual reproduction//cellular localization//organic substance transport//metabolic p…	--	--	GO:0070011//GO:0003824//GO:0043167//GO:0003674//GO:0008270//GO:0004175//GO:0016787//GO:0008237//GO:0043169//GO:0046914//GO:0005515//GO:0046872//GO:0008233//GO:0004222//GO:0005488	peptidase activity, acting on L-amino acid peptides//catalytic activity//ion binding//molecular_function//zinc ion binding//endopeptidase activity//hydrolase activity//metallopeptidase activity//cation binding//transition metal ion binding//protein binding//metal ion binding//peptidase activity//metalloendopeptidase activity//binding	K20184 vacuolar protein sorting-associated protein 41 | (RefSeq) vacuolar protein sorting-associated protein 41 homolog	http://www.genome.jp/dbget-bin/www_bget?sot:102582868	--	PREDICTED: vacuolar protein sorting-associated protein 41 homolog [Solanum tuberosum]
142	Novel01028	2401.58	5947.84	-1.3084	2.1862e-08	2.8146e-07	DOWN	--	--	--	--	GO:0005488//GO:0008289//GO:0003674	binding//lipid binding//molecular_function	no KO assigned | (RefSeq) protein ENHANCED DISEASE RESISTANCE 2-like	http://www.genome.jp/dbget-bin/www_bget?sot:102585665	--	PREDICTED: uncharacterized protein LOC102585665 [Solanum tuberosum]
143	Novel01029	35.3043	187.472	-2.4088	4.2977e-09	6.37e-08	DOWN	--	--	--	--	GO:0005488//GO:0005515//GO:0003674	binding//protein binding//molecular_function	no KO assigned | (RefSeq) putative disease resistance protein At3g14460	http://www.genome.jp/dbget-bin/www_bget?sot:102599979	--	PREDICTED: putative disease resistance protein At3g14460-like isoform X1 [Solanum tuberosum]
144	Novel01038	6.99639	37.4238	-2.4193	0.0025164	0.0091006	DOWN	--	--	--	--	GO:0043169//GO:0046914//GO:0046872//GO:0005488//GO:0097159//GO:1901363//GO:0003676//GO:0043167//GO:0003674//GO:0008270	cation binding//transition metal ion binding//metal ion binding//binding//organic cyclic compound binding//heterocyclic compound binding//nucleic acid binding//ion binding//molecular_function//zinc ion binding	no KO assigned | (RefSeq) uncharacterized LOC102600866	http://www.genome.jp/dbget-bin/www_bget?sot:102600866	--	PREDICTED: uncharacterized protein LOC104649108 [Solanum lycopersicum]
145	Novel01054	55.975	395.988	-2.8226	5.7008e-17	3.1342e-15	DOWN	--	--	GO:0044446//GO:0043229//GO:0044422//GO:0031090//GO:0031966//GO:0044424//GO:0005622//GO:0044464//GO:0031967//GO:0019866//GO:0044444//GO:0005623//GO:0043231//GO:0005575//GO:0016020//GO:0043227//GO:0044429//GO:0005739//GO:0005737//GO:0031975//GO:0005740//GO:0043226//GO:0005743	intracellular organelle part//intracellular organelle//organelle part//organelle membrane//mitochondrial membrane//intracellular part//intracellular//cell part//organelle envelope//organelle inner membrane//cytoplasmic part//cell//intracellular membrane-bounded organelle//cellular_component//membrane//membrane-bounded organelle//mitochondrial part//mitochondrion//cytoplasm//envelope//mitochondria…	GO:0015078//GO:0016675//GO:0004129//GO:0005215//GO:0022890//GO:0015075//GO:0008324//GO:0003674//GO:0015077//GO:0009055//GO:0016676//GO:0015002//GO:0022857//GO:0016491//GO:0003824	proton transmembrane transporter activity//oxidoreductase activity, acting on a heme group of donors//cytochrome-c oxidase activity//transporter activity//inorganic cation transmembrane transporter activity//ion transmembrane transporter activity//cation transmembrane transporter activity//molecular_function//monovalent inorganic cation transmembrane transporter activity//electron transfer activi…	no KO assigned | (RefSeq) putative pentatricopeptide repeat-containing protein At5g59900	http://www.genome.jp/dbget-bin/www_bget?sot:102591090	--	PREDICTED: putative pentatricopeptide repeat-containing protein At5g59900-like isoform X1 [Solanum tuberosum]
146	Novel01062	15.7708	71.7691	-2.1861	0.00015516	0.00080403	DOWN	--	--	--	--	--	--	K03437 RNA methyltransferase, TrmH family | (RefSeq) uncharacterized tRNA/rRNA methyltransferase YsgA	http://www.genome.jp/dbget-bin/www_bget?sot:102597650	--	PREDICTED: RNA methyltransferase-like protein 1B-like [Solanum tuberosum]
147	Novel01078	10.9638	41.4701	-1.9193	0.0096464	0.028698	DOWN	--	--	--	--	GO:0001882//GO:0001883//GO:0000166//GO:0032559//GO:0032549//GO:0005488//GO:0043168//GO:0017076//GO:1901265//GO:0097367//GO:0030554//GO:1901363//GO:0097159//GO:0032550//GO:0032555//GO:0043531//GO:0032553//GO:0036094//GO:0003674//GO:0043167	nucleoside binding//purine nucleoside binding//nucleotide binding//adenyl ribonucleotide binding//ribonucleoside binding//binding//anion binding//purine nucleotide binding//nucleoside phosphate binding//carbohydrate derivative binding//adenyl nucleotide binding//heterocyclic compound binding//organic cyclic compound binding//purine ribonucleoside binding//purine ribonucleotide binding//ADP bindin…	--	--	--	PREDICTED: putative late blight resistance protein homolog R1B-16-like [Solanum tuberosum]
148	Novel01080	1609.04	3861.35	-1.2629	8.5919e-08	9.7098e-07	DOWN	--	--	--	--	--	--	no KO assigned | (RefSeq) nuclear pore complex protein NUP1-like	http://www.genome.jp/dbget-bin/www_bget?sot:102599825	--	PREDICTED: putative GPI-anchored protein PB15E9.01c-like [Solanum tuberosum]
149	Novel01082	16.1758	60.302	-1.8984	0.00165	0.00632	DOWN	GO:0008152//GO:0006725//GO:0071704//GO:0044260//GO:0008150//GO:0009987//GO:0006281//GO:0033554//GO:0006950//GO:0006974//GO:0051716//GO:0006289//GO:0044237//GO:1901360//GO:0006139//GO:0051321//GO:0043170//GO:0050896//GO:0006259//GO:0000003//GO:0034641//GO:0007049//GO:0090304//GO:0046483//GO:0044238//GO:0006807	metabolic process//cellular aromatic compound metabolic process//organic substance metabolic process//cellular macromolecule metabolic process//biological_process//cellular process//DNA repair//cellular response to stress//response to stress//cellular response to DNA damage stimulus//cellular response to stimulus//nucleotide-excision repair//cellular metabolic process//organic cyclic compound met…	--	--	GO:0004520//GO:0016829//GO:0016787//GO:0003906//GO:0003674//GO:0003824//GO:0008534//GO:0003676//GO:1901363//GO:0016788//GO:0097159//GO:0004518//GO:0019104//GO:0016798//GO:0005488//GO:0016835//GO:0016799//GO:0003684//GO:0003677//GO:0000702//GO:0004536//GO:0005515//GO:0004519	endodeoxyribonuclease activity//lyase activity//hydrolase activity//DNA-(apurinic or apyrimidinic site) endonuclease activity//molecular_function//catalytic activity//oxidized purine nucleobase lesion DNA N-glycosylase activity//nucleic acid binding//heterocyclic compound binding//hydrolase activity, acting on ester bonds//organic cyclic compound binding//nuclease activity//DNA N-glycosylase acti…	no KO assigned | (RefSeq) protein TONSOKU	http://www.genome.jp/dbget-bin/www_bget?sot:102586614	--	PREDICTED: LOW QUALITY PROTEIN: protein TONSOKU-like [Solanum tuberosum]
150	Novel01097	963.266	1979.59	-1.0392	1.4733e-05	9.8621e-05	DOWN	GO:0036211//GO:0044238//GO:0019538//GO:0016311//GO:0044267//GO:0043170//GO:0006464//GO:0006470//GO:0044237//GO:0009987//GO:0006796//GO:0043412//GO:0008150//GO:0071704//GO:0044260//GO:0008152//GO:0006793	protein modification process//primary metabolic process//protein metabolic process//dephosphorylation//cellular protein metabolic process//macromolecule metabolic process//cellular protein modification process//protein dephosphorylation//cellular metabolic process//cellular process//phosphate-containing compound metabolic process//macromolecule modification//biological_process//organic substance …	--	--	GO:0042578//GO:0004725//GO:0003824//GO:0016788//GO:0003674//GO:0016791//GO:0016787//GO:0008138//GO:0004721	phosphoric ester hydrolase activity//protein tyrosine phosphatase activity//catalytic activity//hydrolase activity, acting on ester bonds//molecular_function//phosphatase activity//hydrolase activity//protein tyrosine/serine/threonine phosphatase activity//phosphoprotein phosphatase activity	no KO assigned | (RefSeq) protein-tyrosine-phosphatase PTP1	http://www.genome.jp/dbget-bin/www_bget?sot:102595005	--	PREDICTED: protein-tyrosine-phosphatase PTP1-like isoform X1 [Solanum tuberosum]
151	Novel01098	886.544	2679.8	-1.5959	4.1495e-06	3.1915e-05	DOWN	GO:0006793//GO:0008152//GO:0071704//GO:0006650//GO:0008150//GO:0006796//GO:0019637//GO:0009987//GO:0044237//GO:0006644//GO:0044255//GO:0006629//GO:0046486//GO:0046488//GO:0044238	phosphorus metabolic process//metabolic process//organic substance metabolic process//glycerophospholipid metabolic process//biological_process//phosphate-containing compound metabolic process//organophosphate metabolic process//cellular process//cellular metabolic process//phospholipid metabolic process//cellular lipid metabolic process//lipid metabolic process//glycerolipid metabolic process//p…	--	--	GO:0032555//GO:0035639//GO:0032550//GO:0016301//GO:0005524//GO:0032553//GO:0036094//GO:0003674//GO:0043167//GO:0016740//GO:1901363//GO:0030554//GO:0003824//GO:0097159//GO:0005488//GO:0032559//GO:0032549//GO:0043168//GO:0017076//GO:0097367//GO:1901265//GO:0016307//GO:0016772//GO:0001882//GO:0000166//GO:0001883//GO:0016773	purine ribonucleotide binding//purine ribonucleoside triphosphate binding//purine ribonucleoside binding//kinase activity//ATP binding//ribonucleotide binding//small molecule binding//molecular_function//ion binding//transferase activity//heterocyclic compound binding//adenyl nucleotide binding//catalytic activity//organic cyclic compound binding//binding//adenyl ribonucleotide binding//ribonucle…	K00921 1-phosphatidylinositol-3-phosphate 5-kinase [EC:2.7.1.150] | (RefSeq) putative 1-phosphatidylinositol-3-phosphate 5-kinase FAB1D	http://www.genome.jp/dbget-bin/www_bget?sot:102598631	--	PREDICTED: putative 1-phosphatidylinositol-3-phosphate 5-kinase FAB1D-like [Solanum tuberosum]
152	Novel01102	35.9	95.7787	-1.4157	0.0031245	0.010944	DOWN	--	--	--	--	--	--	--	--	--	--
153	Novel01105	1437.58	4265.65	-1.5691	2.9561e-11	6.6941e-10	DOWN	--	--	--	--	--	--	no KO assigned | (RefSeq) uncharacterized LOC102598183	http://www.genome.jp/dbget-bin/www_bget?sot:102598183	--	PREDICTED: uncharacterized protein LOC102598183 [Solanum tuberosum]
154	Novel01114	23.028	104.73	-2.1852	1.0418e-05	7.2516e-05	DOWN	--	--	--	--	--	--	--	--	--	--
155	Novel01115	0	24.7531	#NAME?	0.00024885	0.0012252	DOWN	--	--	--	--	--	--	no KO assigned | (RefSeq) uncharacterized LOC102587338	http://www.genome.jp/dbget-bin/www_bget?sot:102587338	--	PREDICTED: zinc finger MYM-type protein 1-like [Nicotiana sylvestris]
156	Novel01123	33.5649	141.185	-2.0726	1.633e-06	1.3835e-05	DOWN	--	--	--	--	--	--	no KO assigned | (RefSeq) uncharacterized LOC102603831	http://www.genome.jp/dbget-bin/www_bget?sot:102603831	--	PREDICTED: uncharacterized protein LOC103420839 [Malus domestica]
157	Novel01124	3.88615	28.2619	-2.8624	0.0029704	0.010471	DOWN	--	--	GO:0043226//GO:0044451//GO:0043233//GO:0043227//GO:0032991//GO:0005575//GO:0043231//GO:0070013//GO:0005623//GO:0044464//GO:0005622//GO:0005634//GO:0031974//GO:0031981//GO:0044424//GO:0016592//GO:0044428//GO:0044422//GO:0044446//GO:0005654//GO:0043229	organelle//nucleoplasm part//organelle lumen//membrane-bounded organelle//protein-containing complex//cellular_component//intracellular membrane-bounded organelle//intracellular organelle lumen//cell//cell part//intracellular//nucleus//membrane-enclosed lumen//nuclear lumen//intracellular part//mediator complex//nuclear part//organelle part//intracellular organelle part//nucleoplasm//intracellula…	--	--	no KO assigned | (RefSeq) uncharacterized LOC102593709	http://www.genome.jp/dbget-bin/www_bget?sot:102593709	--	PREDICTED: uncharacterized protein LOC102593709 [Solanum tuberosum]
158	Novel01128	1925.67	4629.41	-1.2655	9.3342e-06	6.587e-05	DOWN	GO:0008152//GO:0048869//GO:0008150//GO:0009987//GO:0030154//GO:0032502//GO:0006807	metabolic process//cellular developmental process//biological_process//cellular process//cell differentiation//developmental process//nitrogen compound metabolic process	GO:0016020//GO:0032991//GO:0005575//GO:0044436//GO:0009512//GO:0070069//GO:0009579//GO:0044425//GO:0044424//GO:0016021//GO:0005623//GO:0031224//GO:0044464//GO:0005622	membrane//protein-containing complex//cellular_component//thylakoid part//cytochrome b6f complex//cytochrome complex//thylakoid//membrane part//intracellular part//integral component of membrane//cell//intrinsic component of membrane//cell part//intracellular	GO:0016151//GO:0009055//GO:0043167//GO:0003674//GO:0003824//GO:0016740//GO:0005488//GO:0046872//GO:0016772//GO:0043169//GO:0046914//GO:0016773	nickel cation binding//electron transfer activity//ion binding//molecular_function//catalytic activity//transferase activity//binding//metal ion binding//transferase activity, transferring phosphorus-containing groups//cation binding//transition metal ion binding//phosphotransferase activity, alcohol group as acceptor	K00888 phosphatidylinositol 4-kinase A [EC:2.7.1.67] | (RefSeq) phosphatidylinositol 4-kinase alpha 1	http://www.genome.jp/dbget-bin/www_bget?sot:102594185	--	PREDICTED: phosphatidylinositol 4-kinase alpha 1-like [Solanum tuberosum]
159	Novel01134	535.548	1074.39	-1.0044	7.5826e-05	0.00042724	DOWN	GO:0006260//GO:0006796//GO:1901362//GO:0080090//GO:0051171//GO:0009987//GO:0006275//GO:2000112//GO:0006355//GO:0008150//GO:0031326//GO:0031323//GO:0044249//GO:0050789//GO:0009889//GO:0019438//GO:0051052//GO:0043412//GO:2001141//GO:0044260//GO:1901576//GO:0006725//GO:0006351//GO:0034645//GO:0097659//GO:0071704//GO:0006793//GO:1903506//GO:0008152//GO:0051252//GO:0019538//GO:0009058//GO:0006807//GO:…	DNA replication//phosphate-containing compound metabolic process//organic cyclic compound biosynthetic process//regulation of primary metabolic process//regulation of nitrogen compound metabolic process//cellular process//regulation of DNA replication//regulation of cellular macromolecule biosynthetic process//regulation of transcription, DNA-templated//biological_process//regulation of cellular …	GO:0042025//GO:0005575//GO:0043657//GO:0016020//GO:0033646//GO:0033647//GO:0044216//GO:0044217//GO:0043656//GO:0033643//GO:0033648//GO:0044215//GO:0018995	host cell nucleus//cellular_component//host cell//membrane//host intracellular part//host intracellular organelle//other organism cell//other organism part//intracellular region of host//host cell part//host intracellular membrane-bounded organelle//other organism//host	GO:0097159//GO:0016740//GO:0003824//GO:0030554//GO:1901363//GO:0003676//GO:0036094//GO:0003674//GO:0016779//GO:0043167//GO:0003700//GO:0032550//GO:0032555//GO:0035639//GO:0003887//GO:0005524//GO:0032553//GO:0016301//GO:0005515//GO:0016773//GO:0016772//GO:0001882//GO:0004672//GO:0001883//GO:0000166//GO:0034061//GO:0003677//GO:0017076//GO:1901265//GO:0097367//GO:0032549//GO:0032559//GO:0005488//GO:…	organic cyclic compound binding//transferase activity//catalytic activity//adenyl nucleotide binding//heterocyclic compound binding//nucleic acid binding//small molecule binding//molecular_function//nucleotidyltransferase activity//ion binding//DNA-binding transcription factor activity//purine ribonucleoside binding//purine ribonucleotide binding//purine ribonucleoside triphosphate binding//DNA-d…	K16196 eukaryotic translation initiation factor 2-alpha kinase 4 [EC:2.7.11.1] | (RefSeq) probable serine/threonine-protein kinase GCN2	http://www.genome.jp/dbget-bin/www_bget?sot:102605313	--	PREDICTED: probable serine/threonine-protein kinase GCN2-like isoform X1 [Solanum tuberosum]>gi|565370946|ref|XP_006352074.1| PREDICTED: probable serine/threonine-protein kinase GCN2-like isoform X2 [Solanum tuberosum]
160	Novel01136	7.20156	55.7354	-2.9522	2.8912e-05	0.00018097	DOWN	--	--	--	--	--	--	no KO assigned | (RefSeq) uncharacterized LOC102586991	http://www.genome.jp/dbget-bin/www_bget?sot:102586991	--	PREDICTED: uncharacterized protein LOC104218101 [Nicotiana sylvestris]
161	Novel01152	2351.93	5347.38	-1.185	1.1217e-05	7.7589e-05	DOWN	GO:0006858//GO:0055114//GO:0006040//GO:0008150//GO:1901564//GO:0006810//GO:0051234//GO:0071704//GO:0006022//GO:0008152//GO:0044238//GO:0051179//GO:0006807//GO:0006030//GO:1901135//GO:0006629//GO:0043170//GO:1901071	extracellular transport//oxidation-reduction process//amino sugar metabolic process//biological_process//organonitrogen compound metabolic process//transport//establishment of localization//organic substance metabolic process//aminoglycan metabolic process//metabolic process//primary metabolic process//localization//nitrogen compound metabolic process//chitin metabolic process//carbohydrate deriv…	GO:0005575//GO:0005576	cellular_component//extracellular region	GO:0008061//GO:0003824//GO:0016491//GO:0043167//GO:0003674//GO:0009055//GO:0043169//GO:0005515//GO:0051536//GO:0046872//GO:0097367//GO:0051540//GO:0005488	chitin binding//catalytic activity//oxidoreductase activity//ion binding//molecular_function//electron transfer activity//cation binding//protein binding//iron-sulfur cluster binding//metal ion binding//carbohydrate derivative binding//metal cluster binding//binding	K00106 xanthine dehydrogenase/oxidase [EC:1.17.1.4 1.17.3.2] | (RefSeq) xanthine dehydrogenase 1-like	http://www.genome.jp/dbget-bin/www_bget?sot:102596284	--	PREDICTED: xanthine dehydrogenase 1-like [Solanum tuberosum]
162	Novel01183	225.548	613.747	-1.4442	0.011296	0.032763	DOWN	GO:0055114//GO:0008150//GO:0008152	oxidation-reduction process//biological_process//metabolic process	--	--	--	--	K07119 uncharacterized protein | (RefSeq) 2-alkenal reductase (NADP(+)-dependent)-like	http://www.genome.jp/dbget-bin/www_bget?sot:102597961	--	PREDICTED: 2-alkenal reductase (NADP(+)-dependent)-like [Solanum tuberosum]
163	Novel01188	9.37229	47.9685	-2.3556	0.0026586	0.0095335	DOWN	GO:0050896//GO:0009607//GO:0008150	response to stimulus//response to biotic stimulus//biological_process	GO:0016021//GO:0044425//GO:0031224//GO:0005575//GO:0016020//GO:0019012//GO:0019028//GO:0044423//GO:0019013	integral component of membrane//membrane part//intrinsic component of membrane//cellular_component//membrane//virion//viral capsid//virion part//viral nucleocapsid	GO:0046872//GO:0005488//GO:0043169//GO:0003674//GO:0043167	metal ion binding//binding//cation binding//molecular_function//ion binding	--	--	--	PREDICTED: uncharacterized protein LOC102589232 isoform X2 [Solanum tuberosum]
164	Novel01195	23.5786	67.6738	-1.5211	0.0050722	0.016538	DOWN	--	--	--	--	--	--	--	--	--	--
165	Novel01211	17.9299	81.146	-2.1781	0.0011985	0.0047948	DOWN	--	--	--	--	--	--	--	--	--	--
166	Novel01216	9.31109	40.7603	-2.1301	0.0043666	0.014559	DOWN	--	--	--	--	--	--	--	--	--	--
167	Novel01222	1669.05	3396.46	-1.025	1.4024e-05	9.4452e-05	DOWN	GO:0065007//GO:0032011//GO:0050794//GO:0050896//GO:0035556//GO:0007165//GO:0007155//GO:0032012//GO:0022610//GO:0023051//GO:0007264//GO:0010646//GO:1902531//GO:0051716//GO:0046578//GO:0007154//GO:0008150//GO:0050789//GO:0007265//GO:0023052//GO:0009987//GO:0051056//GO:0009966//GO:0048583	biological regulation//ARF protein signal transduction//regulation of cellular process//response to stimulus//intracellular signal transduction//signal transduction//cell adhesion//regulation of ARF protein signal transduction//biological adhesion//regulation of signaling//small GTPase mediated signal transduction//regulation of cell communication//regulation of intracellular signal transduction/…	--	--	GO:0005086//GO:0098772//GO:0005085//GO:0003674	ARF guanyl-nucleotide exchange factor activity//molecular function regulator//guanyl-nucleotide exchange factor activity//molecular_function	K13462 guanine nucleotide-exchange factor | (RefSeq) brefeldin A-inhibited guanine nucleotide-exchange protein 5	http://www.genome.jp/dbget-bin/www_bget?sot:102589034	--	PREDICTED: brefeldin A-inhibited guanine nucleotide-exchange protein 5-like isoform X1 [Solanum tuberosum]>gi|565373138|ref|XP_006353134.1| PREDICTED: brefeldin A-inhibited guanine nucleotide-exchange protein 5-like isoform X2 [Solanum tuberosum]
168	Novel01223	192.45	751.607	-1.9655	3.8221e-11	8.4743e-10	DOWN	GO:0007586//GO:0071704//GO:0008152//GO:0009056//GO:0008150//GO:0016042//GO:0032501//GO:1901575//GO:0044238//GO:0006629	digestion//organic substance metabolic process//metabolic process//catabolic process//biological_process//lipid catabolic process//multicellular organismal process//organic substance catabolic process//primary metabolic process//lipid metabolic process	GO:0005575//GO:0005576	cellular_component//extracellular region	GO:0003674//GO:0030234//GO:0097159//GO:0008047//GO:0003676//GO:1901363//GO:0005488//GO:0098772//GO:0003723	molecular_function//enzyme regulator activity//organic cyclic compound binding//enzyme activator activity//nucleic acid binding//heterocyclic compound binding//binding//molecular function regulator//RNA binding	no KO assigned | (RefSeq) probable uridine nucleosidase 2	http://www.genome.jp/dbget-bin/www_bget?sot:102585840	--	PREDICTED: probable uridine nucleosidase 2-like [Solanum tuberosum]
169	Novel01237	1.59999	21.5002	-3.7482	0.014708	0.041049	DOWN	--	--	--	--	--	--	K17545 serine/threonine-protein kinase ULK4 [EC:2.7.11.1] | (RefSeq) serine/threonine-protein kinase RUNKEL	http://www.genome.jp/dbget-bin/www_bget?sot:102596239	--	PREDICTED: condensin complex subunit 1-like [Nicotiana sylvestris]
170	Novel01243	69.5068	167.259	-1.2669	0.00078984	0.0033346	DOWN	GO:0044238//GO:0005975//GO:0071704//GO:0008152//GO:0008150	primary metabolic process//carbohydrate metabolic process//organic substance metabolic process//metabolic process//biological_process	--	--	GO:0016832//GO:0016830//GO:0003674//GO:0016829//GO:0003824	aldehyde-lyase activity//carbon-carbon lyase activity//molecular_function//lyase activity//catalytic activity	no KO assigned | (RefSeq) RHOMBOID-like protein 12, mitochondrial	http://www.genome.jp/dbget-bin/www_bget?sot:102580895	--	PREDICTED: rhomboid protein 1, mitochondrial-like [Solanum tuberosum]
171	Novel01247	52.9563	120.91	-1.1911	0.0050943	0.016598	DOWN	GO:0019538//GO:0009058//GO:0006807//GO:0046740//GO:0043603//GO:0010467//GO:0051179//GO:0052126//GO:0006412//GO:0044764//GO:0044238//GO:0051814//GO:0034641//GO:0046794//GO:0044419//GO:0044267//GO:0009059//GO:0051704//GO:0051701//GO:0044766//GO:0043170//GO:0043043//GO:0044271//GO:0044403//GO:1902586//GO:0044237//GO:0016032//GO:0040011//GO:0009987//GO:0051234//GO:0006810//GO:0008150//GO:1901564//GO:…	protein metabolic process//biosynthetic process//nitrogen compound metabolic process//transport of virus in host, cell to cell//cellular amide metabolic process//gene expression//localization//movement in host environment//translation//multi-organism cellular process//primary metabolic process//movement in other organism involved in symbiotic interaction//cellular nitrogen compound metabolic proc…	GO:0005622//GO:0031224//GO:0044464//GO:0043228//GO:0044444//GO:0005623//GO:0043229//GO:0016021//GO:0043232//GO:0044425//GO:0044424//GO:0043226//GO:0005575//GO:0016020//GO:0032991//GO:0005840//GO:0005737	intracellular//intrinsic component of membrane//cell part//non-membrane-bounded organelle//cytoplasmic part//cell//intracellular organelle//integral component of membrane//intracellular non-membrane-bounded organelle//membrane part//intracellular part//organelle//cellular_component//membrane//protein-containing complex//ribosome//cytoplasm	GO:0004197//GO:0046914//GO:0043169//GO:0008233//GO:0046872//GO:0005488//GO:0003735//GO:0005198//GO:0070011//GO:0003824//GO:0008234//GO:0003674//GO:0043167//GO:0016787//GO:0004175//GO:0008270	cysteine-type endopeptidase activity//transition metal ion binding//cation binding//peptidase activity//metal ion binding//binding//structural constituent of ribosome//structural molecule activity//peptidase activity, acting on L-amino acid peptides//catalytic activity//cysteine-type peptidase activity//molecular_function//ion binding//hydrolase activity//endopeptidase activity//zinc ion binding	K02921 large subunit ribosomal protein L37Ae | (RefSeq) RPL37A; 60S ribosomal protein L37a	http://www.genome.jp/dbget-bin/www_bget?sot:102593964	--	predicted protein [Physcomitrella patens]>gi|162697503|gb|EDQ83839.1| predicted protein, partial [Physcomitrella patens]
172	Novel01256	3.49887	21.0761	-2.5906	0.015866	0.043822	DOWN	GO:0044267//GO:0019752//GO:0006629//GO:0044238//GO:0043436//GO:0036211//GO:0019538//GO:0044237//GO:0043170//GO:0044255//GO:0006464//GO:0043412//GO:0008150//GO:0009987//GO:0044281//GO:0006082//GO:0008152//GO:0032787//GO:0071704//GO:0044260//GO:0006631	cellular protein metabolic process//carboxylic acid metabolic process//lipid metabolic process//primary metabolic process//oxoacid metabolic process//protein modification process//protein metabolic process//cellular metabolic process//macromolecule metabolic process//cellular lipid metabolic process//cellular protein modification process//macromolecule modification//biological_process//cellular p…	--	--	GO:0000166//GO:0043169//GO:0046914//GO:0050151//GO:0043168//GO:0005488//GO:0046872//GO:0071949//GO:0016835//GO:1901265//GO:0048037//GO:1901363//GO:0003824//GO:0050660//GO:0050662//GO:0097159//GO:0016836//GO:0016829//GO:0016151//GO:0043167//GO:0003674//GO:0036094	nucleotide binding//cation binding//transition metal ion binding//oleate hydratase activity//anion binding//binding//metal ion binding//FAD binding//carbon-oxygen lyase activity//nucleoside phosphate binding//cofactor binding//heterocyclic compound binding//catalytic activity//flavin adenine dinucleotide binding//coenzyme binding//organic cyclic compound binding//hydro-lyase activity//lyase activ…	no KO assigned | (RefSeq) uncharacterized LOC102601884	http://www.genome.jp/dbget-bin/www_bget?sot:102601884	--	PREDICTED: uncharacterized protein LOC104243039 isoform X1 [Nicotiana sylvestris]
173	Novel01318	888.56	2759.38	-1.6348	1.3638e-11	3.281e-10	DOWN	--	--	--	--	GO:0005488//GO:0003674//GO:0003676//GO:1901363//GO:0097159	binding//molecular_function//nucleic acid binding//heterocyclic compound binding//organic cyclic compound binding	no KO assigned | (RefSeq) flowering time control protein FPA	http://www.genome.jp/dbget-bin/www_bget?sot:102593682	--	PREDICTED: flowering time control protein FPA-like [Solanum tuberosum]
174	Novel01328	929.87	4078.01	-2.1328	1.1978e-18	8.3475e-17	DOWN	--	--	--	--	--	--	--	--	--	PREDICTED: uncharacterized protein LOC102590540 [Solanum tuberosum]
175	Novel01329	2.68271	24.0305	-3.1631	0.0031694	0.011075	DOWN	--	--	--	--	--	--	no KO assigned | (RefSeq) uncharacterized LOC102598401	http://www.genome.jp/dbget-bin/www_bget?sot:102598401	--	PREDICTED: uncharacterized protein LOC102598401 [Solanum tuberosum]
176	Novel01330	414.241	948.664	-1.1954	4.9222e-06	3.708e-05	DOWN	--	--	GO:0016021//GO:0044425//GO:0031224//GO:0005575//GO:0016020	integral component of membrane//membrane part//intrinsic component of membrane//cellular_component//membrane	GO:0008233//GO:0004190//GO:0070001//GO:0003674//GO:0004175//GO:0016787//GO:0070011//GO:0003824	peptidase activity//aspartic-type endopeptidase activity//aspartic-type peptidase activity//molecular_function//endopeptidase activity//hydrolase activity//peptidase activity, acting on L-amino acid peptides//catalytic activity	--	--	--	PREDICTED: uncharacterized protein LOC101258077 [Solanum lycopersicum]
177	Novel01342	42.7182	131.303	-1.62	0.0056169	0.018041	DOWN	--	--	--	--	GO:0005515//GO:0005488//GO:0003674	protein binding//binding//molecular_function	no KO assigned | (RefSeq) probable LRR receptor-like serine/threonine-protein kinase At1g53430	http://www.genome.jp/dbget-bin/www_bget?sot:102599975	--	PREDICTED: probable LRR receptor-like serine/threonine-protein kinase At1g53430-like [Solanum tuberosum]
178	Novel01370	1465.43	3141.03	-1.0999	7.6399e-06	5.4919e-05	DOWN	--	--	--	--	--	--	no KO assigned | (RefSeq) uncharacterized LOC102603145	http://www.genome.jp/dbget-bin/www_bget?sot:102603145	--	PREDICTED: uncharacterized protein LOC102603145 isoform X1 [Solanum tuberosum]>gi|565398728|ref|XP_006364922.1| PREDICTED: uncharacterized protein LOC102603145 isoform X2 [Solanum tuberosum]
179	Novel01375	8.36628	101.822	-3.6053	9.7467e-08	1.0862e-06	DOWN	--	--	--	--	GO:0005488//GO:0003677//GO:0046983//GO:0005515//GO:0003674//GO:1901363//GO:0003676//GO:0097159	binding//DNA binding//protein dimerization activity//protein binding//molecular_function//heterocyclic compound binding//nucleic acid binding//organic cyclic compound binding	K10406 kinesin family member C2/C3 | (RefSeq) kinesin-4-like	http://www.genome.jp/dbget-bin/www_bget?sot:102600707	--	PREDICTED: kinesin-4-like [Solanum tuberosum]
180	Novel01380	102.507	281.623	-1.458	0.0052667	0.017068	DOWN	--	--	GO:0012505//GO:0044464//GO:0005622//GO:0005634//GO:0005635//GO:0005623//GO:0031967//GO:0044428//GO:0044422//GO:0043229//GO:0044446//GO:0044424//GO:0031975//GO:0043226//GO:0043227//GO:0005575//GO:0043231//GO:0005643	endomembrane system//cell part//intracellular//nucleus//nuclear envelope//cell//organelle envelope//nuclear part//organelle part//intracellular organelle//intracellular organelle part//intracellular part//envelope//organelle//membrane-bounded organelle//cellular_component//intracellular membrane-bounded organelle//nuclear pore	--	--	no KO assigned | (RefSeq) uncharacterized LOC102592475	http://www.genome.jp/dbget-bin/www_bget?sot:102592475	--	PREDICTED: uncharacterized protein LOC104099787 isoform X2 [Nicotiana tomentosiformis]
181	Novel01391	11.4231	40.5042	-1.8261	0.010887	0.031781	DOWN	GO:0043170//GO:0006399//GO:1901360//GO:0006139//GO:0044237//GO:0006807//GO:0044238//GO:0046483//GO:0043436//GO:0090304//GO:0034641//GO:0016070//GO:0019752//GO:0044260//GO:0006520//GO:0071704//GO:0006725//GO:0008152//GO:0043039//GO:0006082//GO:0009987//GO:0044281//GO:0043038//GO:0034660//GO:0008150//GO:1901564	macromolecule metabolic process//tRNA metabolic process//organic cyclic compound metabolic process//nucleobase-containing compound metabolic process//cellular metabolic process//nitrogen compound metabolic process//primary metabolic process//heterocycle metabolic process//oxoacid metabolic process//nucleic acid metabolic process//cellular nitrogen compound metabolic process//RNA metabolic process…	GO:0044424//GO:0005622//GO:0044464//GO:0005623//GO:0005575//GO:0005737	intracellular part//intracellular//cell part//cell//cellular_component//cytoplasm	GO:0017076//GO:0016874//GO:0097367//GO:0016875//GO:1901265//GO:0005488//GO:0032549//GO:0032559//GO:0043168//GO:0003723//GO:0001882//GO:0000166//GO:0001883//GO:0000049//GO:0036094//GO:0003674//GO:0043167//GO:0032555//GO:0035639//GO:0032550//GO:0005524//GO:0032553//GO:0097159//GO:0004812//GO:1901363//GO:0003676//GO:0003824//GO:0030554	purine nucleotide binding//ligase activity//carbohydrate derivative binding//ligase activity, forming carbon-oxygen bonds//nucleoside phosphate binding//binding//ribonucleoside binding//adenyl ribonucleotide binding//anion binding//RNA binding//nucleoside binding//nucleotide binding//purine nucleoside binding//tRNA binding//small molecule binding//molecular_function//ion binding//purine ribonucle…	K01889 phenylalanyl-tRNA synthetase alpha chain [EC:6.1.1.20] | (RefSeq) phenylalanine--tRNA ligase, chloroplastic/mitochondrial	http://www.genome.jp/dbget-bin/www_bget?sot:102580607	--	PREDICTED: phenylalanine--tRNA ligase, chloroplastic/mitochondrial-like [Solanum tuberosum]
182	Novel01393	16.1076	58.768	-1.8673	0.0023751	0.0086572	DOWN	--	--	--	--	--	--	--	--	--	--
183	Novel01394	721.609	1496.38	-1.0522	1.912e-05	0.00012491	DOWN	--	--	--	--	--	--	--	--	--	--
184	Novel01424	17.5147	52.1405	-1.5738	0.010028	0.029646	DOWN	--	--	--	--	--	--	no KO assigned | (RefSeq) uncharacterized LOC102601884	http://www.genome.jp/dbget-bin/www_bget?sot:102601884	--	PREDICTED: uncharacterized protein LOC102601884 [Solanum tuberosum]
185	Novel01440	12.1293	44.125	-1.8631	0.0076725	0.023604	DOWN	--	--	--	--	--	--	--	--	--	Putative integrase, identical [Solanum demissum]
186	Novel01441	397.163	1447.17	-1.8654	5.8372e-05	0.00033873	DOWN	--	--	--	--	--	--	--	--	--	PREDICTED: uncharacterized protein LOC102591431 [Solanum tuberosum]
187	Novel01442	923.212	2143.37	-1.2151	5.8595e-07	5.5295e-06	DOWN	GO:0008152//GO:0055114//GO:0008150	metabolic process//oxidation-reduction process//biological_process	--	--	GO:0036094//GO:0003674//GO:0043167//GO:0032555//GO:0035639//GO:0032550//GO:0016787//GO:0005524//GO:0032553//GO:0050662//GO:0097159//GO:0016491//GO:1901363//GO:0003676//GO:0030554//GO:0003824//GO:0017076//GO:0016616//GO:0048037//GO:0097367//GO:0016614//GO:1901265//GO:0005488//GO:0051287//GO:0032559//GO:0032549//GO:0043168//GO:0001882//GO:0003677//GO:0000166//GO:0001883	small molecule binding//molecular_function//ion binding//purine ribonucleotide binding//purine ribonucleoside triphosphate binding//purine ribonucleoside binding//hydrolase activity//ATP binding//ribonucleotide binding//coenzyme binding//organic cyclic compound binding//oxidoreductase activity//heterocyclic compound binding//nucleic acid binding//adenyl nucleotide binding//catalytic activity//pur…	K14439 SWI/SNF-related matrix-associated actin-dependent regulator of chromatin subfamily A containing DEAD/H box 1 [EC:3.6.4.12] | (RefSeq) protein CHROMATIN REMODELING 19	http://www.genome.jp/dbget-bin/www_bget?sot:102600838	--	PREDICTED: SWI/SNF-related matrix-associated actin-dependent regulator of chromatin subfamily A containing DEAD/H box 1-like [Solanum tuberosum]
188	Novel01445	491.465	1429.67	-1.5405	8.7326e-10	1.5029e-08	DOWN	GO:2001141//GO:1901576//GO:0044260//GO:0006351//GO:0034645//GO:0071704//GO:0097659//GO:0006725//GO:1903506//GO:0008152//GO:0051252//GO:0033554//GO:0006281//GO:0051171//GO:0009987//GO:1901362//GO:0080090//GO:0031323//GO:0044249//GO:0050789//GO:0009889//GO:2000112//GO:0006355//GO:0031326//GO:0008150//GO:0019438//GO:0009059//GO:0019219//GO:0043170//GO:0019222//GO:0044271//GO:0006139//GO:1901360//GO:…	regulation of RNA biosynthetic process//organic substance biosynthetic process//cellular macromolecule metabolic process//transcription, DNA-templated//cellular macromolecule biosynthetic process//organic substance metabolic process//nucleic acid-templated transcription//cellular aromatic compound metabolic process//regulation of nucleic acid-templated transcription//metabolic process//regulation…	--	--	GO:0016818//GO:0036094//GO:0003674//GO:0043167//GO:0032555//GO:0035639//GO:0016787//GO:0032550//GO:0005524//GO:0032553//GO:0004386//GO:0016462//GO:0097159//GO:0003724//GO:0009378//GO:1901363//GO:0003676//GO:0003824//GO:0030554//GO:0017076//GO:0097367//GO:1901265//GO:0005488//GO:0016817//GO:0032549//GO:0032559//GO:0043168//GO:0008134//GO:0005515//GO:0003723//GO:0017111//GO:0003678//GO:0001882//GO:…	hydrolase activity, acting on acid anhydrides, in phosphorus-containing anhydrides//small molecule binding//molecular_function//ion binding//purine ribonucleotide binding//purine ribonucleoside triphosphate binding//hydrolase activity//purine ribonucleoside binding//ATP binding//ribonucleotide binding//helicase activity//pyrophosphatase activity//organic cyclic compound binding//RNA helicase acti…	no KO assigned | (RefSeq) uncharacterized LOC102599482	http://www.genome.jp/dbget-bin/www_bget?sot:102599482	--	PREDICTED: uncharacterized protein LOC102599482 [Solanum tuberosum]
189	Novel01447	2924.7	7928.34	-1.4387	0.00030303	0.0014555	DOWN	GO:0051179//GO:0008150//GO:0051234//GO:0006810	localization//biological_process//establishment of localization//transport	GO:0016020//GO:0005575	membrane//cellular_component	GO:0005215//GO:0050290//GO:0042578//GO:0004620//GO:0008081//GO:0003824//GO:0016298//GO:0016788//GO:0003674//GO:0016787	transporter activity//sphingomyelin phosphodiesterase D activity//phosphoric ester hydrolase activity//phospholipase activity//phosphoric diester hydrolase activity//catalytic activity//lipase activity//hydrolase activity, acting on ester bonds//molecular_function//hydrolase activity	K14638 solute carrier family 15 (peptide/histidine transporter), member 3/4 | (RefSeq) protein NRT1/ PTR FAMILY 8.3-like	http://www.genome.jp/dbget-bin/www_bget?sot:102586471	--	PREDICTED: peptide transporter PTR2-like [Solanum tuberosum]
190	Novel01451	20.9686	276.783	-3.7225	8.3399e-07	7.63e-06	DOWN	--	--	--	--	--	--	no KO assigned | (RefSeq) uncharacterized LOC102600304	http://www.genome.jp/dbget-bin/www_bget?sot:102600304	--	PREDICTED: nucleoprotein TPR-like [Solanum tuberosum]
191	Novel01490	101.694	412.298	-2.0195	1.4303e-10	2.8403e-09	DOWN	--	--	--	--	--	--	no KO assigned | (RefSeq) ABC transporter I family member 11, chloroplastic	http://www.genome.jp/dbget-bin/www_bget?sot:102585802	--	PREDICTED: ABC transporter I family member 11, chloroplastic-like isoform X5 [Solanum tuberosum]
192	Novel01493	274.899	1269.53	-2.2073	4.9564e-17	2.7504e-15	DOWN	--	--	--	--	--	--	no KO assigned | (RefSeq) uncharacterized protein At4g19900	http://www.genome.jp/dbget-bin/www_bget?sot:102593803	--	PREDICTED: uncharacterized protein At4g19900-like [Solanum tuberosum]
193	Novel01495	16.2996	68.9595	-2.0809	0.0003637	0.0017071	DOWN	--	--	--	--	--	--	--	--	--	--
194	Novel01496	62.3519	241.653	-1.9544	0.0071945	0.022293	DOWN	GO:0065007//GO:0019538//GO:0065009//GO:0044238//GO:0019222//GO:0043170//GO:0008150//GO:0050789//GO:0006508//GO:0050790//GO:0008152//GO:0071704	biological regulation//protein metabolic process//regulation of molecular function//primary metabolic process//regulation of metabolic process//macromolecule metabolic process//biological_process//regulation of biological process//proteolysis//regulation of catalytic activity//metabolic process//organic substance metabolic process	--	--	GO:0004197//GO:0008233//GO:0003824//GO:0070011//GO:0004175//GO:0016787//GO:0008234//GO:0003674	cysteine-type endopeptidase activity//peptidase activity//catalytic activity//peptidase activity, acting on L-amino acid peptides//endopeptidase activity//hydrolase activity//cysteine-type peptidase activity//molecular_function	K01363 cathepsin B [EC:3.4.22.1] | (RefSeq) cathepsin B-like	http://www.genome.jp/dbget-bin/www_bget?sot:102605367	--	hypothetical protein EUGRSUZ_A00982 [Eucalyptus grandis]
195	Novel01514	135.799	2145.37	-3.9817	7.8991e-10	1.3754e-08	DOWN	GO:0050789//GO:0044249//GO:0031323//GO:0009889//GO:2000112//GO:0008150//GO:0031326//GO:0006355//GO:0019438//GO:0009987//GO:0051171//GO:1901362//GO:0080090//GO:1903506//GO:0008152//GO:0051252//GO:0044260//GO:1901576//GO:2001141//GO:0097659//GO:0071704//GO:0034645//GO:0006351//GO:0006725//GO:0016070//GO:0034641//GO:0032774//GO:0010468//GO:0065007//GO:0050794//GO:0018130//GO:0060255//GO:0010556//GO:…	regulation of biological process//cellular biosynthetic process//regulation of cellular metabolic process//regulation of biosynthetic process//regulation of cellular macromolecule biosynthetic process//biological_process//regulation of cellular biosynthetic process//regulation of transcription, DNA-templated//aromatic compound biosynthetic process//cellular process//regulation of nitrogen compoun…	--	--	GO:1901363//GO:0003676//GO:0097159//GO:0003674//GO:0003677//GO:0005488	heterocyclic compound binding//nucleic acid binding//organic cyclic compound binding//molecular_function//DNA binding//binding	no KO assigned | (RefSeq) uncharacterized LOC102579072	http://www.genome.jp/dbget-bin/www_bget?sot:102579072	--	PREDICTED: uncharacterized protein LOC102579072 [Solanum tuberosum]
196	Novel01516	1349.22	4085.39	-1.5984	1.662e-11	3.9409e-10	DOWN	GO:0065007//GO:0032774//GO:0010468//GO:0034641//GO:0016070//GO:0034654//GO:0060255//GO:0010556//GO:0018130//GO:0050794//GO:0006807//GO:0009058//GO:0010467//GO:0090304//GO:0046483//GO:0044238//GO:1901360//GO:0006139//GO:0044271//GO:0044237//GO:0019219//GO:0009059//GO:0019222//GO:0043170//GO:0006355//GO:0008150//GO:0031326//GO:2000112//GO:0009889//GO:0031323//GO:0044249//GO:0050789//GO:0019438//GO:…	biological regulation//RNA biosynthetic process//regulation of gene expression//cellular nitrogen compound metabolic process//RNA metabolic process//nucleobase-containing compound biosynthetic process//regulation of macromolecule metabolic process//regulation of macromolecule biosynthetic process//heterocycle biosynthetic process//regulation of cellular process//nitrogen compound metabolic proces…	GO:0044217//GO:0033647//GO:0044216//GO:0033648//GO:0044215//GO:0018995//GO:0043656//GO:0033643//GO:0042025//GO:0005575//GO:0043657//GO:0033646	other organism part//host intracellular organelle//other organism cell//host intracellular membrane-bounded organelle//other organism//host//intracellular region of host//host cell part//host cell nucleus//cellular_component//host cell//host intracellular part	GO:0003674//GO:0003700	molecular_function//DNA-binding transcription factor activity	no KO assigned | (RefSeq) uncharacterized LOC102601713	http://www.genome.jp/dbget-bin/www_bget?sot:102601713	--	PREDICTED: uncharacterized protein LOC102601713 [Solanum tuberosum]
197	Novel01518	682.789	1549.12	-1.1819	1.403e-06	1.214e-05	DOWN	GO:0006310//GO:0009058//GO:0019538//GO:0034470//GO:0006807//GO:0010467//GO:0090304//GO:0046483//GO:0044238//GO:0032774//GO:0010468//GO:0065007//GO:0006259//GO:0016070//GO:0034641//GO:0070525//GO:0060255//GO:0010556//GO:0034654//GO:0050794//GO:0018130//GO:0050896//GO:0009059//GO:0019219//GO:0019222//GO:0006399//GO:0043170//GO:0044271//GO:1901360//GO:0006139//GO:0006974//GO:0002949//GO:0006950//GO:…	DNA recombination//biosynthetic process//protein metabolic process//ncRNA processing//nitrogen compound metabolic process//gene expression//nucleic acid metabolic process//heterocycle metabolic process//primary metabolic process//RNA biosynthetic process//regulation of gene expression//biological regulation//DNA metabolic process//RNA metabolic process//cellular nitrogen compound metabolic proces…	--	--	GO:0017111//GO:0008134//GO:0003723//GO:0005515//GO:0003678//GO:0001882//GO:0001883//GO:0000166//GO:0016887//GO:0017076//GO:0008233//GO:1901265//GO:0097367//GO:0032559//GO:0032549//GO:0016817//GO:0005488//GO:0004222//GO:0043168//GO:0097159//GO:0070011//GO:0004386//GO:0016462//GO:0009378//GO:0003724//GO:0016491//GO:0030554//GO:0003824//GO:1901363//GO:0003676//GO:0036094//GO:0016818//GO:0003674//GO:…	nucleoside-triphosphatase activity//transcription factor binding//RNA binding//protein binding//DNA helicase activity//nucleoside binding//purine nucleoside binding//nucleotide binding//ATPase activity//purine nucleotide binding//peptidase activity//nucleoside phosphate binding//carbohydrate derivative binding//adenyl ribonucleotide binding//ribonucleoside binding//hydrolase activity, acting on a…	K03798 cell division protease FtsH [EC:3.4.24.-] | (RefSeq) ATP-dependent zinc metalloprotease FTSH 12, chloroplastic	http://www.genome.jp/dbget-bin/www_bget?sot:102589653	--	PREDICTED: ATP-dependent zinc metalloprotease FTSH 12, chloroplastic-like [Solanum tuberosum]
198	Novel01522	15.8898	97.4544	-2.6166	0.0014847	0.005768	DOWN	GO:0044237//GO:0051704//GO:0006464//GO:0016310//GO:0009875//GO:0032501//GO:0044703//GO:0022414//GO:0007154//GO:0043170//GO:0044267//GO:0019538//GO:0036211//GO:0044238//GO:0006468//GO:0006793//GO:0008152//GO:0044260//GO:0044706//GO:0071704//GO:0008150//GO:0043412//GO:0009856//GO:0008037//GO:0006796//GO:0048544//GO:0009987	cellular metabolic process//multi-organism process//cellular protein modification process//phosphorylation//pollen-pistil interaction//multicellular organismal process//multi-organism reproductive process//reproductive process//cell communication//macromolecule metabolic process//cellular protein metabolic process//protein metabolic process//protein modification process//primary metabolic process…	--	--	GO:0032559//GO:0032549//GO:0005488//GO:0043168//GO:0017076//GO:1901265//GO:0097367//GO:0016772//GO:0001882//GO:0004672//GO:0001883//GO:0000166//GO:0016773//GO:0004674//GO:0032550//GO:0032555//GO:0035639//GO:0005524//GO:0032553//GO:0016301//GO:0036094//GO:0003674//GO:0043167//GO:0016740//GO:0030554//GO:0003824//GO:1901363//GO:0097159	adenyl ribonucleotide binding//ribonucleoside binding//binding//anion binding//purine nucleotide binding//nucleoside phosphate binding//carbohydrate derivative binding//transferase activity, transferring phosphorus-containing groups//nucleoside binding//protein kinase activity//purine nucleoside binding//nucleotide binding//phosphotransferase activity, alcohol group as acceptor//protein serine/th…	no KO assigned | (RefSeq) G-type lectin S-receptor-like serine/threonine-protein kinase At1g11330	http://www.genome.jp/dbget-bin/www_bget?sot:102588603	--	PREDICTED: LOW QUALITY PROTEIN: uncharacterized protein LOC101264400 [Solanum lycopersicum]
199	Novel01534	0.655185	16.1965	-4.6276	0.0034359	0.011872	DOWN	--	--	GO:0016020//GO:0005575	membrane//cellular_component	GO:0032561//GO:0017111//GO:0000166//GO:0016887//GO:0001883//GO:0005525//GO:0001882//GO:0097367//GO:1901265//GO:0017076//GO:0043168//GO:0003924//GO:0005488//GO:0032549//GO:0016817//GO:0032559//GO:0016462//GO:0097159//GO:1901363//GO:0003824//GO:0030554//GO:0019001//GO:0043167//GO:0036094//GO:0016818//GO:0003674//GO:0005524//GO:0032553//GO:0032555//GO:0035639//GO:0032550//GO:0016787	guanyl ribonucleotide binding//nucleoside-triphosphatase activity//nucleotide binding//ATPase activity//purine nucleoside binding//GTP binding//nucleoside binding//carbohydrate derivative binding//nucleoside phosphate binding//purine nucleotide binding//anion binding//GTPase activity//binding//ribonucleoside binding//hydrolase activity, acting on acid anhydrides//adenyl ribonucleotide binding//py…	no KO assigned | (RefSeq) ABC transporter G family member 31-like	http://www.genome.jp/dbget-bin/www_bget?sot:102594745	--	PREDICTED: ABC transporter G family member 31-like [Solanum tuberosum]
200	Novel01543	367.515	1129.68	-1.62	3.8218e-10	7.0604e-09	DOWN	--	--	GO:0016021//GO:0044425//GO:0031224//GO:0016020//GO:0005575	integral component of membrane//membrane part//intrinsic component of membrane//membrane//cellular_component	GO:0008233//GO:0004190//GO:0070001//GO:0003674//GO:0004175//GO:0016787//GO:0070011//GO:0003824	peptidase activity//aspartic-type endopeptidase activity//aspartic-type peptidase activity//molecular_function//endopeptidase activity//hydrolase activity//peptidase activity, acting on L-amino acid peptides//catalytic activity	--	--	--	--
201	Novel01550	67.4192	276.537	-2.0362	4.4189e-09	6.5236e-08	DOWN	--	--	--	--	--	--	--	--	--	PREDICTED: uncharacterized protein LOC104115357 [Nicotiana tomentosiformis]
202	Novel01575	596.138	3902.21	-2.7106	3.9412e-08	4.7992e-07	DOWN	GO:0008150//GO:0008152	biological_process//metabolic process	--	--	GO:0003824//GO:0016740//GO:0003674//GO:0016746	catalytic activity//transferase activity//molecular_function//transferase activity, transferring acyl groups	no KO assigned | (RefSeq) ENHANCER OF AG-4 protein 2	http://www.genome.jp/dbget-bin/www_bget?sot:102602857	--	PREDICTED: ENHANCER OF AG-4 protein 2-like [Solanum tuberosum]
203	Novel01576	3851.02	8467.56	-1.1367	0.0036906	0.012645	DOWN	--	--	GO:0016020//GO:0005575//GO:0044425//GO:0016021//GO:0031224	membrane//cellular_component//membrane part//integral component of membrane//intrinsic component of membrane	GO:0008270//GO:0043167//GO:0003674//GO:0005488//GO:0046872//GO:0043169//GO:0005515//GO:0046914	zinc ion binding//ion binding//molecular_function//binding//metal ion binding//cation binding//protein binding//transition metal ion binding	K17592 sacsin | (RefSeq) sacsin	http://www.genome.jp/dbget-bin/www_bget?sot:102603537	--	PREDICTED: sacsin-like [Solanum tuberosum]
204	Novel01578	1498.31	3433.02	-1.1961	3.6257e-07	3.5832e-06	DOWN	--	--	--	--	GO:0005515//GO:0005488//GO:0003674	protein binding//binding//molecular_function	no KO assigned | (RefSeq) N-lysine methyltransferase setd6	http://www.genome.jp/dbget-bin/www_bget?sot:102606019	--	PREDICTED: N-lysine methyltransferase setd6-like isoform X1 [Solanum tuberosum]
205	Novel01579	2368.28	4865.55	-1.0388	9.3954e-06	6.6254e-05	DOWN	GO:0019538//GO:1901575//GO:0044238//GO:0044267//GO:0044257//GO:0043170//GO:0044237//GO:0019941//GO:0009056//GO:0043632//GO:0009987//GO:0044248//GO:0006511//GO:0009057//GO:0008150//GO:0044260//GO:0030163//GO:0071704//GO:0006508//GO:0044265//GO:0051603//GO:0008152	protein metabolic process//organic substance catabolic process//primary metabolic process//cellular protein metabolic process//cellular protein catabolic process//macromolecule metabolic process//cellular metabolic process//modification-dependent protein catabolic process//catabolic process//modification-dependent macromolecule catabolic process//cellular process//cellular catabolic process//ubiq…	--	--	GO:0005515//GO:0044389//GO:0019899//GO:0005488//GO:0003674//GO:0031625	protein binding//ubiquitin-like protein ligase binding//enzyme binding//binding//molecular_function//ubiquitin protein ligase binding	K10609 cullin 4 | (RefSeq) cullin-4-like	http://www.genome.jp/dbget-bin/www_bget?sot:102605478	--	PREDICTED: cullin-4-like [Solanum tuberosum]
206	Novel01623	329.11	5206.95	-3.9838	5.0706e-06	3.8101e-05	DOWN	GO:0050789//GO:0008150//GO:0071704//GO:0006508//GO:0008152//GO:0050790//GO:0019538//GO:0044238//GO:0065009//GO:0065007//GO:0043170//GO:0019222	regulation of biological process//biological_process//organic substance metabolic process//proteolysis//metabolic process//regulation of catalytic activity//protein metabolic process//primary metabolic process//regulation of molecular function//biological regulation//macromolecule metabolic process//regulation of metabolic process	--	--	GO:0070011//GO:0003824//GO:0003674//GO:0008234//GO:0004175//GO:0016787//GO:0004197//GO:0008233	peptidase activity, acting on L-amino acid peptides//catalytic activity//molecular_function//cysteine-type peptidase activity//endopeptidase activity//hydrolase activity//cysteine-type endopeptidase activity//peptidase activity	K01363 cathepsin B [EC:3.4.22.1] | (RefSeq) cathepsin B-like	http://www.genome.jp/dbget-bin/www_bget?sot:102605367	--	PREDICTED: cathepsin B-like [Solanum tuberosum]
207	Novel01626	589.672	1813.1	-1.6205	6.1459e-11	1.3051e-09	DOWN	GO:0046907//GO:0042147//GO:0006810//GO:0051234//GO:0008150//GO:0051649//GO:0051641//GO:0016197//GO:0051179//GO:0016192	intracellular transport//retrograde transport, endosome to Golgi//transport//establishment of localization//biological_process//establishment of localization in cell//cellular localization//endosomal transport//localization//vesicle-mediated transport	--	--	--	--	K17600 vacuolar protein sorting-associated protein 54 | (RefSeq) vacuolar protein sorting-associated protein 54, chloroplastic-like	http://www.genome.jp/dbget-bin/www_bget?sot:102605373	--	PREDICTED: vacuolar protein sorting-associated protein 54, chloroplastic-like isoform X1 [Solanum lycopersicum]
208	Novel01636	56.057	1292.57	-4.5272	0.00033463	0.0015887	DOWN	GO:0008152//GO:0006508//GO:0071704//GO:0008150//GO:0043170//GO:0044238//GO:0019538	metabolic process//proteolysis//organic substance metabolic process//biological_process//macromolecule metabolic process//primary metabolic process//protein metabolic process	--	--	GO:0004252//GO:0004175//GO:0016787//GO:0008236//GO:0003674//GO:0003824//GO:0017171//GO:0070011//GO:0008233	serine-type endopeptidase activity//endopeptidase activity//hydrolase activity//serine-type peptidase activity//molecular_function//catalytic activity//serine hydrolase activity//peptidase activity, acting on L-amino acid peptides//peptidase activity	no KO assigned | (RefSeq) subtilisin-like protease SBT1.7	http://www.genome.jp/dbget-bin/www_bget?sot:102579454	--	PREDICTED: subtilisin-like protease-like [Solanum tuberosum]
209	Novel01637	11.1589	324.477	-4.8618	1.1184e-05	7.7381e-05	DOWN	--	--	--	--	--	--	no KO assigned | (RefSeq) subtilisin-like protease SBT1.7	http://www.genome.jp/dbget-bin/www_bget?sot:102579454	--	PREDICTED: subtilisin-like protease [Solanum lycopersicum]
210	Novel01640	6.37825	57.5776	-3.1743	6.4707e-06	4.7281e-05	DOWN	--	--	--	--	GO:0005488//GO:0005515//GO:0003674	binding//protein binding//molecular_function	--	--	--	PREDICTED: probable LRR receptor-like serine/threonine-protein kinase At1g07650 [Solanum lycopersicum]
211	Novel01663	0	15.1093	#NAME?	0.00060505	0.0026447	DOWN	GO:0034645//GO:0071704//GO:0006518//GO:0006725//GO:0044260//GO:1901576//GO:0006520//GO:0043604//GO:0008152//GO:0009987//GO:0044281//GO:0006426//GO:0043039//GO:0006082//GO:0043038//GO:0044249//GO:1901566//GO:1901564//GO:0008150//GO:0034660//GO:0043170//GO:0006399//GO:0009059//GO:0044237//GO:1901360//GO:0006139//GO:0044271//GO:0043043//GO:0044238//GO:0046483//GO:0043436//GO:0006418//GO:0090304//GO:…	cellular macromolecule biosynthetic process//organic substance metabolic process//peptide metabolic process//cellular aromatic compound metabolic process//cellular macromolecule metabolic process//organic substance biosynthetic process//cellular amino acid metabolic process//amide biosynthetic process//metabolic process//cellular process//small molecule metabolic process//glycyl-tRNA aminoacylati…	GO:0005575//GO:0005737//GO:0044424//GO:0044464//GO:0005622//GO:0005623	cellular_component//cytoplasm//intracellular part//cell part//intracellular//cell	GO:0043167//GO:0003674//GO:0004820//GO:0036094//GO:0016829//GO:0032553//GO:0000287//GO:0005524//GO:0035639//GO:0032555//GO:0032550//GO:0097159//GO:1901363//GO:0003824//GO:0030554//GO:0004812//GO:0016838//GO:0097367//GO:0046872//GO:0016835//GO:0016875//GO:1901265//GO:0017076//GO:0016874//GO:0010333//GO:0043168//GO:0005488//GO:0032549//GO:0032559//GO:0043169//GO:0000166//GO:0001883//GO:0001882	ion binding//molecular_function//glycine-tRNA ligase activity//small molecule binding//lyase activity//ribonucleotide binding//magnesium ion binding//ATP binding//purine ribonucleoside triphosphate binding//purine ribonucleotide binding//purine ribonucleoside binding//organic cyclic compound binding//heterocyclic compound binding//catalytic activity//adenyl nucleotide binding//aminoacyl-tRNA liga…	K14173 alpha-farnesene synthase [EC:4.2.3.46] | (RefSeq) (E,E)-alpha-farnesene synthase-like	http://www.genome.jp/dbget-bin/www_bget?sot:102600675	--	PREDICTED: (E,E)-alpha-farnesene synthase-like [Solanum tuberosum]
212	Novel01672	13.5156	69.3223	-2.3587	6.8699e-05	0.00039124	DOWN	--	--	--	--	--	--	no KO assigned | (RefSeq) uncharacterized LOC102596342	http://www.genome.jp/dbget-bin/www_bget?sot:102596342	--	PREDICTED: uncharacterized protein LOC102596342 isoform X1 [Solanum tuberosum]
213	Novel01680	426.779	870.006	-1.0275	5.2797e-05	0.00030947	DOWN	GO:0006629//GO:1901135//GO:0009058//GO:0046467//GO:1903509//GO:0044238//GO:0044237//GO:0044255//GO:0008150//GO:0006643//GO:0006664//GO:0044249//GO:0008610//GO:0009987//GO:1901137//GO:0008152//GO:1901576//GO:0071704//GO:0009247	lipid metabolic process//carbohydrate derivative metabolic process//biosynthetic process//membrane lipid biosynthetic process//liposaccharide metabolic process//primary metabolic process//cellular metabolic process//cellular lipid metabolic process//biological_process//membrane lipid metabolic process//glycolipid metabolic process//cellular biosynthetic process//lipid biosynthetic process//cellul…	GO:0005575//GO:0016020	cellular_component//membrane	GO:0008066//GO:0015075//GO:0022838//GO:0005215//GO:0060089//GO:0015276//GO:0004888//GO:0005231//GO:0004871//GO:0016758//GO:0016740//GO:0022857//GO:0003824//GO:0005230//GO:0022803//GO:0004970//GO:0015267//GO:0005234//GO:0003674//GO:0016757//GO:0022836//GO:0022834//GO:0038023//GO:0005216	glutamate receptor activity//ion transmembrane transporter activity//substrate-specific channel activity//transporter activity//molecular transducer activity//ligand-gated ion channel activity//transmembrane signaling receptor activity//excitatory extracellular ligand-gated ion channel activity//obsolete signal transducer activity//transferase activity, transferring hexosyl groups//transferase ac…	K05387 glutamate receptor, ionotropic, plant | (RefSeq) glutamate receptor 3.6-like	http://www.genome.jp/dbget-bin/www_bget?sot:102594716	--	PREDICTED: glutamate receptor 3.6-like [Solanum tuberosum]
214	Novel01696	372.044	1136.79	-1.6114	1.2411e-07	1.3477e-06	DOWN	GO:0055114//GO:0009056//GO:0044248//GO:0031329//GO:0009987//GO:0008150//GO:0031323//GO:0006914//GO:0050789//GO:0009896//GO:0048522//GO:0031331//GO:0031325//GO:0008152//GO:0065007//GO:0010508//GO:0050794//GO:0048518//GO:0019222//GO:0010506//GO:0009894//GO:0009893//GO:0044237	oxidation-reduction process//catabolic process//cellular catabolic process//regulation of cellular catabolic process//cellular process//biological_process//regulation of cellular metabolic process//autophagy//regulation of biological process//positive regulation of catabolic process//positive regulation of cellular process//positive regulation of cellular catabolic process//positive regulation of…	--	--	GO:0097159//GO:0050662//GO:0016491//GO:0003824//GO:1901363//GO:0003674//GO:0036094//GO:0005515//GO:0000166//GO:0004470//GO:0048037//GO:0016616//GO:0016614//GO:1901265//GO:0016615//GO:0051287//GO:0005488//GO:0004471	organic cyclic compound binding//coenzyme binding//oxidoreductase activity//catalytic activity//heterocyclic compound binding//molecular_function//small molecule binding//protein binding//nucleotide binding//malic enzyme activity//cofactor binding//oxidoreductase activity, acting on the CH-OH group of donors, NAD or NADP as acceptor//oxidoreductase activity, acting on CH-OH group of donors//nucle…	no KO assigned | (RefSeq) lisH domain and HEAT repeat-containing protein KIAA1468 homolog	http://www.genome.jp/dbget-bin/www_bget?sot:102582556	--	PREDICTED: lisH domain and HEAT repeat-containing protein KIAA1468 homolog [Solanum tuberosum]
215	Novel01705	696.01	8908.18	-3.678	7.9494e-09	1.1233e-07	DOWN	--	--	GO:0044425//GO:0031224//GO:0016020//GO:0005575	membrane part//intrinsic component of membrane//membrane//cellular_component	--	--	no KO assigned | (RefSeq) uncharacterized LOC102580554	http://www.genome.jp/dbget-bin/www_bget?sot:102580554	--	PREDICTED: uncharacterized protein LOC101252655 isoform X1 [Solanum lycopersicum]
216	Novel01712	57.9706	223.083	-1.9442	1.6998e-07	1.7908e-06	DOWN	--	--	--	--	--	--	--	--	--	--
217	Novel01713	12.5398	565.132	-5.494	0.0018969	0.0071349	DOWN	--	--	--	--	--	--	K10691 E3 ubiquitin-protein ligase UBR4 [EC:2.3.2.27] | (RefSeq) auxin transport protein BIG	http://www.genome.jp/dbget-bin/www_bget?sot:102599636	--	PREDICTED: auxin transport protein BIG-like [Solanum tuberosum]
218	Novel01717	918.015	2231.31	-1.2813	1.0407e-07	1.1511e-06	DOWN	GO:0008150//GO:0051234//GO:0006810//GO:0009987//GO:0051179//GO:0055085	biological_process//establishment of localization//transport//cellular process//localization//transmembrane transport	GO:0016020//GO:0005575//GO:0031224//GO:0044425//GO:0016021	membrane//cellular_component//intrinsic component of membrane//membrane part//integral component of membrane	--	--	no KO assigned | (RefSeq) WAT1-related protein At5g40240-like	http://www.genome.jp/dbget-bin/www_bget?sot:102585310	--	PREDICTED: WAT1-related protein At5g40240-like [Solanum tuberosum]
219	Novel01718	51.1168	286.586	-2.4871	0.0016912	0.006458	DOWN	--	--	--	--	--	--	K10529 alpha-dioxygenase [EC:1.-.-.-] | (RefSeq) alpha-dioxygenase 1-like	http://www.genome.jp/dbget-bin/www_bget?sot:102579471	--	PREDICTED: alpha-dioxygenase 1-like [Solanum tuberosum]
220	Novel01724	737.852	1510.86	-1.034	0.00060308	0.0026373	DOWN	GO:0070727//GO:0051179//GO:0019538//GO:0006886//GO:0044238//GO:0045184//GO:0015031//GO:0008104//GO:0043170//GO:0008150//GO:0051234//GO:0006810//GO:0046907//GO:0006508//GO:0071702//GO:0051641//GO:0008152//GO:0033036//GO:0051649//GO:0071704//GO:0034613	cellular macromolecule localization//localization//protein metabolic process//intracellular protein transport//primary metabolic process//establishment of protein localization//protein transport//protein localization//macromolecule metabolic process//biological_process//establishment of localization//transport//intracellular transport//proteolysis//organic substance transport//cellular localizati…	--	--	GO:0017016//GO:0005515//GO:0008238//GO:0016805//GO:0005488//GO:0008233//GO:0019899//GO:0031267//GO:0051020//GO:0003824//GO:0070011//GO:0008536//GO:0016787//GO:0003674	Ras GTPase binding//protein binding//exopeptidase activity//dipeptidase activity//binding//peptidase activity//enzyme binding//small GTPase binding//GTPase binding//catalytic activity//peptidase activity, acting on L-amino acid peptides//Ran GTPase binding//hydrolase activity//molecular_function	no KO assigned | (RefSeq) uncharacterized LOC102586736	http://www.genome.jp/dbget-bin/www_bget?sot:102586736	--	PREDICTED: uncharacterized protein LOC102586736 [Solanum tuberosum]
221	Novel01726	2848.05	6134.08	-1.1069	1.7646e-06	1.4803e-05	DOWN	--	--	--	--	GO:0008173//GO:0003674//GO:0008168//GO:0016741//GO:0008649//GO:0003824//GO:0016740//GO:0016433//GO:0008757	RNA methyltransferase activity//molecular_function//methyltransferase activity//transferase activity, transferring one-carbon groups//rRNA methyltransferase activity//catalytic activity//transferase activity//rRNA (adenine) methyltransferase activity//S-adenosylmethionine-dependent methyltransferase activity	no KO assigned | (RefSeq) uncharacterized LOC102592710	http://www.genome.jp/dbget-bin/www_bget?sot:102592710	--	PREDICTED: cell wall protein AWA1-like [Solanum tuberosum]
222	Novel01731	10.3033	71.124	-2.7872	7.0481e-06	5.1073e-05	DOWN	--	--	--	--	--	--	no KO assigned | (RefSeq) probable LRR receptor-like serine/threonine-protein kinase At5g45840	http://www.genome.jp/dbget-bin/www_bget?sot:102590768	--	PREDICTED: uncharacterized protein LOC102590768 [Solanum tuberosum]
223	Novel01733	603.681	1350.21	-1.1613	3.2432e-06	2.558e-05	DOWN	--	--	--	--	GO:0003674//GO:0043167//GO:0005488//GO:0046872//GO:0043169	molecular_function//ion binding//binding//metal ion binding//cation binding	no KO assigned | (RefSeq) protein FRIGIDA-ESSENTIAL 1-like	http://www.genome.jp/dbget-bin/www_bget?sot:102597500	--	PREDICTED: protein FRIGIDA-ESSENTIAL 1-like isoform X1 [Solanum tuberosum]>gi|565352596|ref|XP_006343226.1| PREDICTED: protein FRIGIDA-ESSENTIAL 1-like isoform X2 [Solanum tuberosum]>gi|565352598|ref|XP_006343227.1| PREDICTED: protein FRIGIDA-ESSENTIAL 1-like isoform X3 [Solanum tuberosum]>gi|565352600|ref|XP_006343228.1| PREDICTED: protein FRIGIDA-ESSENTIAL 1-like isoform X4 [Solanum tuberosum]
224	Novel01734	2.8042	70.5801	-4.6536	1.1448e-05	7.9058e-05	DOWN	--	--	--	--	--	--	--	--	--	--
225	Novel01740	42.1838	209.605	-2.3129	1.8165e-09	2.9073e-08	DOWN	--	--	--	--	--	--	K08492 syntaxin 18 | (RefSeq) syntaxin-81-like	http://www.genome.jp/dbget-bin/www_bget?sot:102596731	--	PREDICTED: syntaxin-81-like [Solanum lycopersicum]
226	Novel01742	4.91843	294.818	-5.9055	2.9982e-06	2.38e-05	DOWN	--	--	--	--	--	--	--	--	--	--
227	Novel01756	157.327	942.03	-2.582	9.271e-20	7.379e-18	DOWN	--	--	GO:0016020//GO:0005575//GO:0044425//GO:0016021//GO:0031224	membrane//cellular_component//membrane part//integral component of membrane//intrinsic component of membrane	GO:0032553//GO:0005524//GO:0008237//GO:0032550//GO:0008270//GO:0016787//GO:0004175//GO:0035639//GO:0032555//GO:0043167//GO:0003674//GO:0036094//GO:0003824//GO:0030554//GO:1901363//GO:0097159//GO:0070011//GO:0043168//GO:0032549//GO:0032559//GO:0004222//GO:0005488//GO:1901265//GO:0097367//GO:0046872//GO:0008233//GO:0017076//GO:0001883//GO:0000166//GO:0001882//GO:0043169//GO:0046914	ribonucleotide binding//ATP binding//metallopeptidase activity//purine ribonucleoside binding//zinc ion binding//hydrolase activity//endopeptidase activity//purine ribonucleoside triphosphate binding//purine ribonucleotide binding//ion binding//molecular_function//small molecule binding//catalytic activity//adenyl nucleotide binding//heterocyclic compound binding//organic cyclic compound binding/…	no KO assigned | (RefSeq) probable inactive ATP-dependent zinc metalloprotease FTSHI 3, chloroplastic	http://www.genome.jp/dbget-bin/www_bget?sot:102590643	--	PREDICTED: uncharacterized protein LOC102590643 [Solanum tuberosum]
228	Novel01759	10.6137	69.5951	-2.7131	9.596e-06	6.7525e-05	DOWN	--	--	--	--	--	--	--	--	--	--
229	Novel01764	790.434	1686.04	-1.0929	8.1545e-06	5.8195e-05	DOWN	--	--	GO:0043226//GO:0005737//GO:0005575//GO:0043231//GO:0005739//GO:0043227//GO:0005623//GO:0044444//GO:0005622//GO:0044464//GO:0044424//GO:0043229	organelle//cytoplasm//cellular_component//intracellular membrane-bounded organelle//mitochondrion//membrane-bounded organelle//cell//cytoplasmic part//intracellular//cell part//intracellular part//intracellular organelle	GO:0016491//GO:0016651//GO:0008137//GO:0003824//GO:0003674//GO:0003954//GO:0050136//GO:0016655	oxidoreductase activity//oxidoreductase activity, acting on NAD(P)H//NADH dehydrogenase (ubiquinone) activity//catalytic activity//molecular_function//NADH dehydrogenase activity//NADH dehydrogenase (quinone) activity//oxidoreductase activity, acting on NAD(P)H, quinone or similar compound as acceptor	no KO assigned | (RefSeq) uncharacterized LOC102595381	http://www.genome.jp/dbget-bin/www_bget?sot:102595381	--	PREDICTED: uncharacterized protein LOC102595381 isoform X1 [Solanum tuberosum]>gi|565389729|ref|XP_006360602.1| PREDICTED: uncharacterized protein LOC102595381 isoform X2 [Solanum tuberosum]>gi|565389731|ref|XP_006360603.1| PREDICTED: uncharacterized protein LOC102595381 isoform X3 [Solanum tuberosum]
230	Novel01766	15.5229	92.0779	-2.5685	0.0017236	0.0065617	DOWN	--	--	--	--	--	--	--	--	--	--
231	Novel01770	4341.42	12453.3	-1.5203	3.3056e-11	7.4232e-10	DOWN	GO:0006826//GO:0023052//GO:0030001//GO:0015684//GO:0008150//GO:0051234//GO:0006810//GO:0050789//GO:0009987//GO:0000041//GO:0006811//GO:0007264//GO:0051716//GO:0006812//GO:0072511//GO:0007154//GO:0050896//GO:0050794//GO:0065007//GO:0007165//GO:0070838//GO:0035556//GO:0051179	iron ion transport//signaling//metal ion transport//ferrous iron transport//biological_process//establishment of localization//transport//regulation of biological process//cellular process//transition metal ion transport//ion transport//small GTPase mediated signal transduction//cellular response to stimulus//cation transport//divalent inorganic cation transport//cell communication//response to s…	GO:0016020//GO:0005575//GO:0044425//GO:0016021//GO:0031224	membrane//cellular_component//membrane part//integral component of membrane//intrinsic component of membrane	GO:0032553//GO:0032550//GO:0035639//GO:0032555//GO:0043167//GO:0003674//GO:0036094//GO:1901363//GO:0019001//GO:0046915//GO:0022857//GO:0097159//GO:0072509//GO:0015093//GO:0005381//GO:0008289//GO:0043168//GO:0032549//GO:0005488//GO:1901265//GO:0097367//GO:0017076//GO:0005525//GO:0015075//GO:0001883//GO:0000166//GO:0008324//GO:0001882//GO:0022890//GO:0005543//GO:0032561//GO:0035091//GO:0046873//GO:…	ribonucleotide binding//purine ribonucleoside binding//purine ribonucleoside triphosphate binding//purine ribonucleotide binding//ion binding//molecular_function//small molecule binding//heterocyclic compound binding//guanyl nucleotide binding//transition metal ion transmembrane transporter activity//transmembrane transporter activity//organic cyclic compound binding//divalent inorganic cation tr…	K06207 GTP-binding protein | (RefSeq) GTP-binding protein TypA/BipA homolog	http://www.genome.jp/dbget-bin/www_bget?sot:102598186	--	PREDICTED: translation factor GUF1 homolog, chloroplastic-like [Solanum tuberosum]
232	Novel01777	711.747	1854.92	-1.3819	9.1652e-08	1.0295e-06	DOWN	--	--	--	--	GO:0043167//GO:0036094//GO:0003674//GO:0016301//GO:0005524//GO:0032553//GO:0032555//GO:0035639//GO:0032550//GO:0016787//GO:0097159//GO:1901363//GO:0003676//GO:0003824//GO:0030554//GO:0016740//GO:0097367//GO:1901265//GO:0017076//GO:0043168//GO:0005488//GO:0032549//GO:0032559//GO:0004674//GO:0016773//GO:0000166//GO:0003677//GO:0001883//GO:0004672//GO:0016772//GO:0001882	ion binding//small molecule binding//molecular_function//kinase activity//ATP binding//ribonucleotide binding//purine ribonucleotide binding//purine ribonucleoside triphosphate binding//purine ribonucleoside binding//hydrolase activity//organic cyclic compound binding//heterocyclic compound binding//nucleic acid binding//catalytic activity//adenyl nucleotide binding//transferase activity//carbohy…	K11320 E1A-binding protein p400 [EC:3.6.4.-] | (RefSeq) protein PHOTOPERIOD-INDEPENDENT EARLY FLOWERING 1	http://www.genome.jp/dbget-bin/www_bget?sot:102593766	--	PREDICTED: protein PHOTOPERIOD-INDEPENDENT EARLY FLOWERING 1-like [Solanum tuberosum]
233	Novel01801	2420.77	8462.63	-1.8056	1.06e-06	9.4731e-06	DOWN	GO:0071704//GO:0008152//GO:0008150//GO:0043170//GO:0044238//GO:0019538	organic substance metabolic process//metabolic process//biological_process//macromolecule metabolic process//primary metabolic process//protein metabolic process	--	--	--	--	no KO assigned | (RefSeq) ATP-dependent Clp protease ATP-binding subunit CLPT1, chloroplastic-like	http://www.genome.jp/dbget-bin/www_bget?sot:102605408	--	PREDICTED: clp protease-related protein At4g12060, chloroplastic-like [Solanum tuberosum]
234	Novel01830	3.59105	64.8213	-4.174	1.1716e-07	1.2811e-06	DOWN	--	--	--	--	--	--	--	--	--	PREDICTED: uncharacterized protein LOC104211723 [Nicotiana sylvestris]
235	Novel01845	33.7997	131.967	-1.9651	3.705e-05	0.00022565	DOWN	GO:0008150//GO:0006950//GO:0050896	biological_process//response to stress//response to stimulus	--	--	GO:0005516//GO:0003674//GO:0005488//GO:0005515	calmodulin binding//molecular_function//binding//protein binding	no KO assigned | (RefSeq) calmodulin-binding protein 60 A-like	http://www.genome.jp/dbget-bin/www_bget?sot:102581617	--	PREDICTED: uncharacterized protein LOC102581617 [Solanum tuberosum]
236	Novel01850	19.1564	237.086	-3.6295	0.00011008	0.00059249	DOWN	GO:0044238//GO:0005975//GO:0071704//GO:0008152//GO:0008150	primary metabolic process//carbohydrate metabolic process//organic substance metabolic process//metabolic process//biological_process	--	--	GO:0016832//GO:0016830//GO:0003674//GO:0016829//GO:0003824	aldehyde-lyase activity//carbon-carbon lyase activity//molecular_function//lyase activity//catalytic activity	no KO assigned | (RefSeq) formin-like protein 20	http://www.genome.jp/dbget-bin/www_bget?sot:102593556	--	PREDICTED: formin-like protein 20-like [Solanum tuberosum]
237	Novel01857	22.1174	81.2068	-1.8764	0.0094057	0.028084	DOWN	GO:0065007//GO:0050794//GO:0065008//GO:0042592//GO:0045454//GO:0009987//GO:0019725//GO:0050789//GO:0008150	biological regulation//regulation of cellular process//regulation of biological quality//homeostatic process//cell redox homeostasis//cellular process//cellular homeostasis//regulation of biological process//biological_process	--	--	--	--	no KO assigned | (RefSeq) TPR repeat-containing thioredoxin TDX	http://www.genome.jp/dbget-bin/www_bget?sot:102589949	--	PREDICTED: uncharacterized protein LOC104646564 [Solanum lycopersicum]
238	Novel01872	3183.42	7990.9	-1.3278	0.0014805	0.0057543	DOWN	GO:0051607//GO:0009615//GO:0002252//GO:0051704//GO:0006950//GO:0009605//GO:0098542//GO:0051179//GO:0050896//GO:0006952//GO:0051707//GO:0043207//GO:0002376//GO:0009607//GO:0006810//GO:0051234//GO:0008150	defense response to virus//response to virus//immune effector process//multi-organism process//response to stress//response to external stimulus//defense response to other organism//localization//response to stimulus//defense response//response to other organism//response to external biotic stimulus//immune system process//response to biotic stimulus//transport//establishment of localization//bio…	GO:0016020//GO:0005575	membrane//cellular_component	GO:0005215//GO:0003674	transporter activity//molecular_function	K14638 solute carrier family 15 (peptide/histidine transporter), member 3/4 | (RefSeq) protein NRT1/ PTR FAMILY 1.2-like	http://www.genome.jp/dbget-bin/www_bget?sot:102591974	--	PREDICTED: probable peptide transporter At1g52190-like [Solanum tuberosum]
239	Novel01874	23.3526	80.9099	-1.7927	0.0006938	0.0029839	DOWN	--	--	--	--	--	--	no KO assigned | (RefSeq) protein PAF1 homolog	http://www.genome.jp/dbget-bin/www_bget?sot:102605929	--	PREDICTED: zinc finger CCCH domain-containing protein 4-like [Solanum tuberosum]
240	Novel01876	18.7903	91.9304	-2.2906	1.8226e-05	0.00011945	DOWN	GO:0008152//GO:0006725//GO:0071704//GO:0015074//GO:0044260//GO:0008150//GO:0009987//GO:0044237//GO:0006139//GO:1901360//GO:0043170//GO:0006259//GO:0034641//GO:0090304//GO:0044238//GO:0046483//GO:0006807	metabolic process//cellular aromatic compound metabolic process//organic substance metabolic process//DNA integration//cellular macromolecule metabolic process//biological_process//cellular process//cellular metabolic process//nucleobase-containing compound metabolic process//organic cyclic compound metabolic process//macromolecule metabolic process//DNA metabolic process//cellular nitrogen compo…	--	--	GO:0008270//GO:0043167//GO:0003674//GO:1901363//GO:0003676//GO:0097159//GO:0005488//GO:0046872//GO:0043169//GO:0046914	zinc ion binding//ion binding//molecular_function//heterocyclic compound binding//nucleic acid binding//organic cyclic compound binding//binding//metal ion binding//cation binding//transition metal ion binding	no KO assigned | (RefSeq) uncharacterized LOC102599229	http://www.genome.jp/dbget-bin/www_bget?sot:102599229	--	Integrase core domain containing protein [Solanum demissum]
241	Novel01883	97.6345	482.974	-2.3065	3.5832e-12	9.4139e-11	DOWN	GO:0043170//GO:0019538//GO:0044238//GO:0071704//GO:0006508//GO:0008152//GO:0008150	macromolecule metabolic process//protein metabolic process//primary metabolic process//organic substance metabolic process//proteolysis//metabolic process//biological_process	--	--	GO:0004190//GO:0008233//GO:0070001//GO:0003674//GO:0016787//GO:0004175//GO:0070011//GO:0003824	aspartic-type endopeptidase activity//peptidase activity//aspartic-type peptidase activity//molecular_function//hydrolase activity//endopeptidase activity//peptidase activity, acting on L-amino acid peptides//catalytic activity	K14832 ribosome biogenesis protein MAK21 | (RefSeq) uncharacterized protein C4F10.09c	http://www.genome.jp/dbget-bin/www_bget?sot:102578279	--	PREDICTED: CCAAT/enhancer-binding protein zeta-like [Solanum tuberosum]
242	Novel01886	40.2764	127.973	-1.6678	0.00045451	0.0020696	DOWN	--	--	--	--	--	--	--	--	--	PREDICTED: uncharacterized protein LOC104211209 [Nicotiana sylvestris]
243	Novel01888	734.586	2730.66	-1.8942	9.2903e-15	3.6101e-13	DOWN	GO:0008150//GO:0008152	biological_process//metabolic process	--	--	GO:0003824//GO:0003674	catalytic activity//molecular_function	no KO assigned | (RefSeq) 4-coumarate--CoA ligase-like 9	http://www.genome.jp/dbget-bin/www_bget?sot:102588059	--	PREDICTED: 4-coumarate--CoA ligase-like 9-like [Solanum tuberosum]
244	Novel01889	454.26	1291.71	-1.5077	3.2308e-09	4.9238e-08	DOWN	GO:0034645//GO:0006351//GO:0071704//GO:0097659//GO:0006725//GO:2001141//GO:1901576//GO:0044260//GO:0032984//GO:0051252//GO:0031556//GO:0008152//GO:1903506//GO:0009987//GO:0051171//GO:0080090//GO:1901362//GO:0019438//GO:0009889//GO:0044249//GO:0031323//GO:0050789//GO:0006353//GO:0006355//GO:0031326//GO:0008150//GO:2000112//GO:0043170//GO:0019222//GO:0019219//GO:0043244//GO:0009059//GO:0051128//GO:…	cellular macromolecule biosynthetic process//transcription, DNA-templated//organic substance metabolic process//nucleic acid-templated transcription//cellular aromatic compound metabolic process//regulation of RNA biosynthetic process//organic substance biosynthetic process//cellular macromolecule metabolic process//protein-containing complex disassembly//regulation of RNA metabolic process//tran…	--	--	GO:0016779//GO:0003674//GO:0003824//GO:0016740//GO:0070566//GO:0004781//GO:0004779//GO:0016772	nucleotidyltransferase activity//molecular_function//catalytic activity//transferase activity//adenylyltransferase activity//sulfate adenylyltransferase (ATP) activity//sulfate adenylyltransferase activity//transferase activity, transferring phosphorus-containing groups	K13811 3'-phosphoadenosine 5'-phosphosulfate synthase [EC:2.7.7.4 2.7.1.25] | (RefSeq) Stmet3-1; ATP sulfurylase 1, chloroplastic-like	http://www.genome.jp/dbget-bin/www_bget?sot:102593050	--	PREDICTED: ATP sulfurylase 1, chloroplastic-like [Solanum tuberosum]
245	Novel01908	87.4043	288.821	-1.7244	2.4683e-07	2.5199e-06	DOWN	--	--	--	--	--	--	--	--	--	--
246	Novel01913	725	1550.81	-1.097	9.6049e-06	6.7571e-05	DOWN	--	--	--	--	--	--	no KO assigned | (RefSeq) protein furry homolog-like	http://www.genome.jp/dbget-bin/www_bget?sot:102587154	--	PREDICTED: protein furry-like [Solanum tuberosum]
247	Novel01938	75.6714	208.797	-1.4643	4.8245e-05	0.00028549	DOWN	GO:0008150//GO:1901564//GO:0044249//GO:1901566//GO:0044283//GO:0019438//GO:0055114//GO:0006082//GO:0008652//GO:1901362//GO:0044281//GO:0009987//GO:0008152//GO:0006520//GO:1901576//GO:0006725//GO:0009073//GO:0071704//GO:0019752//GO:0006807//GO:0009058//GO:0043436//GO:0044238//GO:1901360//GO:0016053//GO:0044237//GO:0046394//GO:0009072	biological_process//organonitrogen compound metabolic process//cellular biosynthetic process//organonitrogen compound biosynthetic process//small molecule biosynthetic process//aromatic compound biosynthetic process//oxidation-reduction process//organic acid metabolic process//cellular amino acid biosynthetic process//organic cyclic compound biosynthetic process//small molecule metabolic process/…	--	--	GO:0016491//GO:0003824//GO:0003856//GO:0016829//GO:0003674//GO:0016835//GO:0016838	oxidoreductase activity//catalytic activity//3-dehydroquinate synthase activity//lyase activity//molecular_function//carbon-oxygen lyase activity//carbon-oxygen lyase activity, acting on phosphates	no KO assigned | (RefSeq) 3-dehydroquinate synthase homolog	http://www.genome.jp/dbget-bin/www_bget?sot:102596054	--	PREDICTED: uncharacterized protein LOC102596054 [Solanum tuberosum]
248	Novel01939	1247.82	3652.43	-1.5494	1.6145e-06	1.3702e-05	DOWN	GO:0009405//GO:0008150//GO:0051704	pathogenesis//biological_process//multi-organism process	GO:0005575//GO:0005576	cellular_component//extracellular region	--	--	K06617 raffinose synthase [EC:2.4.1.82] | (RefSeq) probable galactinol--sucrose galactosyltransferase 2	http://www.genome.jp/dbget-bin/www_bget?sot:102600756	--	PREDICTED: probable galactinol--sucrose galactosyltransferase 2-like isoform X1 [Solanum tuberosum]>gi|565392275|ref|XP_006361830.1| PREDICTED: probable galactinol--sucrose galactosyltransferase 2-like isoform X2 [Solanum tuberosum]
249	Novel01947	222.631	552.642	-1.3117	0.00015046	0.00078254	DOWN	GO:0008150//GO:0034660//GO:0008033//GO:0009987//GO:0006396//GO:0008152//GO:0006725//GO:0071704//GO:0044260//GO:0016070//GO:0034641//GO:0090304//GO:0046483//GO:0044238//GO:0034470//GO:0006807//GO:0010467//GO:0044237//GO:1901360//GO:0006139//GO:0006399//GO:0043170	biological_process//ncRNA metabolic process//tRNA processing//cellular process//RNA processing//metabolic process//cellular aromatic compound metabolic process//organic substance metabolic process//cellular macromolecule metabolic process//RNA metabolic process//cellular nitrogen compound metabolic process//nucleic acid metabolic process//heterocycle metabolic process//primary metabolic process//…	GO:0005737//GO:0005575//GO:0005623//GO:0044464//GO:0005622//GO:0044424	cytoplasm//cellular_component//cell//cell part//intracellular//intracellular part	GO:0030554//GO:0003824//GO:1901363//GO:0016879//GO:0097159//GO:0032553//GO:0005524//GO:0032550//GO:0035639//GO:0032555//GO:0043167//GO:0003674//GO:0036094//GO:0001883//GO:0000166//GO:0001882//GO:0043168//GO:0032559//GO:0032549//GO:0005488//GO:1901265//GO:0097367//GO:0016874//GO:0017076	adenyl nucleotide binding//catalytic activity//heterocyclic compound binding//ligase activity, forming carbon-nitrogen bonds//organic cyclic compound binding//ribonucleotide binding//ATP binding//purine ribonucleoside binding//purine ribonucleoside triphosphate binding//purine ribonucleotide binding//ion binding//molecular_function//small molecule binding//purine nucleoside binding//nucleotide bi…	--	--	--	DNA/RNA polymerases superfamily protein [Theobroma cacao]>gi|508711429|gb|EOY03326.1| DNA/RNA polymerases superfamily protein [Theobroma cacao]
250	Novel01948	707.211	1646.26	-1.219	9.0458e-07	8.2151e-06	DOWN	GO:0019438//GO:0006352//GO:0008150//GO:0044249//GO:1901362//GO:0009987//GO:0008152//GO:0006725//GO:0006351//GO:0034645//GO:0071704//GO:0097659//GO:1901576//GO:0044260//GO:0034654//GO:0018130//GO:0032774//GO:0034641//GO:0016070//GO:0090304//GO:0046483//GO:0044238//GO:0006807//GO:0009058//GO:0010467//GO:0044237//GO:0006139//GO:1901360//GO:0044271//GO:0043170//GO:0009059	aromatic compound biosynthetic process//DNA-templated transcription, initiation//biological_process//cellular biosynthetic process//organic cyclic compound biosynthetic process//cellular process//metabolic process//cellular aromatic compound metabolic process//transcription, DNA-templated//cellular macromolecule biosynthetic process//organic substance metabolic process//nucleic acid-templated tra…	GO:0043226//GO:0043227//GO:0005575//GO:0043231//GO:0005623//GO:0044464//GO:0005622//GO:0005634//GO:0044424//GO:0043229	organelle//membrane-bounded organelle//cellular_component//intracellular membrane-bounded organelle//cell//cell part//intracellular//nucleus//intracellular part//intracellular organelle	GO:0030554//GO:1901363//GO:0097159//GO:0032553//GO:0005524//GO:0032550//GO:0008270//GO:0035639//GO:0032555//GO:0043167//GO:0003674//GO:0036094//GO:0001883//GO:0000166//GO:0001882//GO:0043169//GO:0005515//GO:0046914//GO:0043168//GO:0032549//GO:0032559//GO:0005488//GO:1901265//GO:0097367//GO:0046872//GO:0017076	adenyl nucleotide binding//heterocyclic compound binding//organic cyclic compound binding//ribonucleotide binding//ATP binding//purine ribonucleoside binding//zinc ion binding//purine ribonucleoside triphosphate binding//purine ribonucleotide binding//ion binding//molecular_function//small molecule binding//purine nucleoside binding//nucleotide binding//nucleoside binding//cation binding//protein…	K15710 E3 ubiquitin-protein ligase SHPRH [EC:3.6.4.- 2.3.2.27] | (RefSeq) E3 ubiquitin-protein ligase SHPRH	http://www.genome.jp/dbget-bin/www_bget?sot:102582668	--	PREDICTED: E3 ubiquitin-protein ligase SHPRH-like [Solanum tuberosum]
251	Novel01958	3.46789	20.3817	-2.5551	0.017247	0.047024	DOWN	--	--	--	--	--	--	--	--	--	PREDICTED: uncharacterized protein LOC102588694 [Solanum tuberosum]
252	Novel01965	52.2902	120.108	-1.1997	0.0048536	0.015928	DOWN	--	--	--	--	GO:0003674//GO:0005515//GO:0005488	molecular_function//protein binding//binding	no KO assigned | (RefSeq) F-box/LRR-repeat protein At3g48880-like	http://www.genome.jp/dbget-bin/www_bget?sot:102600704	--	PREDICTED: F-box/LRR-repeat protein At3g48880-like isoform X4 [Solanum tuberosum]>gi|565373532|ref|XP_006353325.1| PREDICTED: F-box/LRR-repeat protein At3g48880-like isoform X5 [Solanum tuberosum]
253	Novel01973	16.7435	76.7381	-2.1963	0.00036358	0.0017071	DOWN	GO:0055085//GO:0051179//GO:0042493//GO:0050896//GO:0006855//GO:0015893//GO:0009987//GO:0006810//GO:0051234//GO:0008150//GO:0042221	transmembrane transport//localization//response to drug//response to stimulus//drug transmembrane transport//drug transport//cellular process//transport//establishment of localization//biological_process//response to chemical	GO:0005575//GO:0016020	cellular_component//membrane	GO:0022804//GO:0005215//GO:0003674//GO:0015291//GO:0015297//GO:0015238//GO:0022857	active transmembrane transporter activity//transporter activity//molecular_function//secondary active transmembrane transporter activity//antiporter activity//drug transmembrane transporter activity//transmembrane transporter activity	K03327 multidrug resistance protein, MATE family | (RefSeq) protein DETOXIFICATION 35-like	http://www.genome.jp/dbget-bin/www_bget?sot:102586300	--	PREDICTED: protein TRANSPARENT TESTA 12-like [Solanum tuberosum]
254	Novel01985	947.203	2679.4	-1.5002	6.954e-10	1.2267e-08	DOWN	GO:0006890//GO:0016192//GO:0048193//GO:0051179//GO:0051649//GO:0008152//GO:0051641//GO:0055114//GO:0046907//GO:0008150//GO:0006810//GO:0051234	retrograde vesicle-mediated transport, Golgi to ER//vesicle-mediated transport//Golgi vesicle transport//localization//establishment of localization in cell//metabolic process//cellular localization//oxidation-reduction process//intracellular transport//biological_process//transport//establishment of localization	--	--	GO:0004174//GO:0003674//GO:0004800//GO:0016649//GO:0003824//GO:0016645//GO:0016491	electron-transferring-flavoprotein dehydrogenase activity//molecular_function//thyroxine 5'-deiodinase activity//oxidoreductase activity, acting on the CH-NH group of donors, quinone or similar compound as acceptor//catalytic activity//oxidoreductase activity, acting on the CH-NH group of donors//oxidoreductase activity	K20473 neuroblastoma-amplified sequence | (RefSeq) MAG2-interacting protein 2	http://www.genome.jp/dbget-bin/www_bget?sot:102589454	--	PREDICTED: uncharacterized protein LOC102589454 [Solanum tuberosum]
255	Novel01998	2272.66	4748.88	-1.0632	0.0033317	0.011554	DOWN	--	--	--	--	--	--	no KO assigned | (RefSeq) uncharacterized LOC102604631	http://www.genome.jp/dbget-bin/www_bget?sot:102604631	--	PREDICTED: uncharacterized protein LOC102604631 isoform X1 [Solanum tuberosum]
256	Novel02009	161.723	363.049	-1.1666	0.00012933	0.00068357	DOWN	GO:0008152//GO:0051252//GO:0043207//GO:1903506//GO:0042742//GO:0012501//GO:0043067//GO:0006725//GO:0097659//GO:0051707//GO:0071704//GO:0034645//GO:0006351//GO:0044260//GO:1901576//GO:2001141//GO:0019438//GO:0009617//GO:2000112//GO:0008150//GO:0031326//GO:0006355//GO:0050789//GO:0044249//GO:0031323//GO:0009889//GO:1901362//GO:0080090//GO:0050830//GO:0009987//GO:0051171//GO:0016265//GO:0010941//GO:…	metabolic process//regulation of RNA metabolic process//response to external biotic stimulus//regulation of nucleic acid-templated transcription//defense response to bacterium//programmed cell death//regulation of programmed cell death//cellular aromatic compound metabolic process//nucleic acid-templated transcription//response to other organism//organic substance metabolic process//cellular macr…	GO:0043227//GO:0043231//GO:0005575//GO:0043226//GO:0044424//GO:0043229//GO:0005623//GO:0044464//GO:0005634//GO:0005622	membrane-bounded organelle//intracellular membrane-bounded organelle//cellular_component//organelle//intracellular part//intracellular organelle//cell//cell part//nucleus//intracellular	GO:0005524//GO:0032553//GO:0008270//GO:0032550//GO:0016787//GO:0032555//GO:0035639//GO:0043167//GO:0003700//GO:0036094//GO:0003674//GO:0030554//GO:0003824//GO:1901363//GO:0003676//GO:0097159//GO:0043168//GO:0032559//GO:0032549//GO:0005488//GO:1901265//GO:0046872//GO:0097367//GO:0017076//GO:0001883//GO:0003677//GO:0000166//GO:0001882//GO:0043169//GO:0046914	ATP binding//ribonucleotide binding//zinc ion binding//purine ribonucleoside binding//hydrolase activity//purine ribonucleotide binding//purine ribonucleoside triphosphate binding//ion binding//DNA-binding transcription factor activity//small molecule binding//molecular_function//adenyl nucleotide binding//catalytic activity//heterocyclic compound binding//nucleic acid binding//organic cyclic com…	no KO assigned | (RefSeq) DNA annealing helicase and endonuclease ZRANB3	http://www.genome.jp/dbget-bin/www_bget?sot:102603029	--	PREDICTED: DNA annealing helicase and endonuclease ZRANB3-like [Solanum tuberosum]
257	Novel02031	2854.65	6050.3	-1.0837	2.5918e-06	2.0943e-05	DOWN	GO:0008150//GO:0050789//GO:0023052//GO:0009987//GO:0051716//GO:0007154//GO:0065007//GO:0050794//GO:0050896//GO:0007165	biological_process//regulation of biological process//signaling//cellular process//cellular response to stimulus//cell communication//biological regulation//regulation of cellular process//response to stimulus//signal transduction	GO:0005575//GO:0044421//GO:0031012//GO:0005576	cellular_component//extracellular region part//extracellular matrix//extracellular region	GO:0005509//GO:0003674//GO:0043167//GO:0005488//GO:0046872//GO:0043169	calcium ion binding//molecular_function//ion binding//binding//metal ion binding//cation binding	no KO assigned | (RefSeq) polyadenylate-binding protein-interacting protein 4-like	http://www.genome.jp/dbget-bin/www_bget?sot:102606381	--	PREDICTED: PAB1-binding protein 1-like [Solanum tuberosum]
258	Novel02039	1.8726	29.2759	-3.9666	0.011563	0.033432	DOWN	--	--	--	--	--	--	no KO assigned | (RefSeq) pentatricopeptide repeat-containing protein At3g20730	http://www.genome.jp/dbget-bin/www_bget?sot:102587579	--	PREDICTED: pentatricopeptide repeat-containing protein At3g20730-like isoform X1 [Nicotiana tomentosiformis]>gi|697135292|ref|XP_009621698.1| PREDICTED: pentatricopeptide repeat-containing protein At3g20730-like isoform X1 [Nicotiana tomentosiformis]>gi|697135294|ref|XP_009621699.1| PREDICTED: pentatricopeptide repeat-containing protein At3g20730-like isoform X1 [Nicotiana tomentosiformis]
259	Novel02040	220.263	618.867	-1.4904	0.00056749	0.0025089	DOWN	GO:0019222//GO:0043170//GO:0019219//GO:0009059//GO:0009615//GO:0051704//GO:0006950//GO:0044237//GO:0009605//GO:1901360//GO:0006139//GO:0044271//GO:0090304//GO:0046483//GO:0044238//GO:0006807//GO:0009058//GO:0010467//GO:0060255//GO:0010556//GO:0034654//GO:0050896//GO:0050794//GO:0018130//GO:0032774//GO:0010468//GO:0065007//GO:0016070//GO:0034641//GO:0006725//GO:0097659//GO:0071704//GO:0051707//GO:…	regulation of metabolic process//macromolecule metabolic process//regulation of nucleobase-containing compound metabolic process//macromolecule biosynthetic process//response to virus//multi-organism process//response to stress//cellular metabolic process//response to external stimulus//organic cyclic compound metabolic process//nucleobase-containing compound metabolic process//cellular nitrogen …	GO:0043229//GO:0044424//GO:0044464//GO:0005622//GO:0005634//GO:0005623//GO:0043227//GO:0005575//GO:0043231//GO:0043226	intracellular organelle//intracellular part//cell part//intracellular//nucleus//cell//membrane-bounded organelle//cellular_component//intracellular membrane-bounded organelle//organelle	GO:1901265//GO:0046872//GO:0097367//GO:0017076//GO:0043168//GO:0032559//GO:0032549//GO:0005488//GO:0043169//GO:0005515//GO:0046914//GO:0001883//GO:0000166//GO:0001882//GO:0043167//GO:0003674//GO:0036094//GO:0032553//GO:0032550//GO:0008270//GO:0043531//GO:0032555//GO:0097159//GO:0030554//GO:1901363	nucleoside phosphate binding//metal ion binding//carbohydrate derivative binding//purine nucleotide binding//anion binding//adenyl ribonucleotide binding//ribonucleoside binding//binding//cation binding//protein binding//transition metal ion binding//purine nucleoside binding//nucleotide binding//nucleoside binding//ion binding//molecular_function//small molecule binding//ribonucleotide binding//…	--	--	--	PREDICTED: probable disease resistance protein At1g62630-like [Solanum tuberosum]
260	Novel02044	576.462	4643.62	-3.01	2.7292e-18	1.7886e-16	DOWN	--	--	--	--	GO:0003824//GO:0016853//GO:0036361//GO:0018112//GO:0003674//GO:0016854//GO:0016855//GO:0005515//GO:0005488//GO:0047661	catalytic activity//isomerase activity//racemase activity, acting on amino acids and derivatives//proline racemase activity//molecular_function//racemase and epimerase activity//racemase and epimerase activity, acting on amino acids and derivatives//protein binding//binding//amino-acid racemase activity	K10839 UV excision repair protein RAD23 | (RefSeq) ubiquitin receptor RAD23d-like	http://www.genome.jp/dbget-bin/www_bget?sot:102599587	--	PREDICTED: ubiquitin receptor RAD23c [Solanum lycopersicum]
261	Novel02050	316.538	669.027	-1.0797	8.1374e-05	0.0004547	DOWN	GO:0008150//GO:0006810//GO:0051234//GO:0051179	biological_process//transport//establishment of localization//localization	--	--	GO:0030554//GO:0003824//GO:0003676//GO:1901363//GO:0016788//GO:0097159//GO:0016462//GO:0004386//GO:0004518//GO:0032553//GO:0005524//GO:0032550//GO:0016787//GO:0035639//GO:0032555//GO:0043167//GO:0003674//GO:0036094//GO:0016818//GO:0001883//GO:0000166//GO:0016891//GO:0001882//GO:0004521//GO:0017111//GO:0004519//GO:0043168//GO:0032559//GO:0032549//GO:0016817//GO:0005488//GO:0016893//GO:1901265//GO:…	adenyl nucleotide binding//catalytic activity//nucleic acid binding//heterocyclic compound binding//hydrolase activity, acting on ester bonds//organic cyclic compound binding//pyrophosphatase activity//helicase activity//nuclease activity//ribonucleotide binding//ATP binding//purine ribonucleoside binding//hydrolase activity//purine ribonucleoside triphosphate binding//purine ribonucleotide bindi…	K14442 ATP-dependent RNA helicase DHX36 [EC:3.6.4.13] | (RefSeq) ATP-dependent RNA helicase DHX36-like	http://www.genome.jp/dbget-bin/www_bget?sot:102586003	--	PREDICTED: probable ATP-dependent RNA helicase DHX36-like [Solanum tuberosum]
262	Novel02055	6.64068	46.6797	-2.8134	0.00013468	0.00070868	DOWN	GO:0007166//GO:0008152//GO:0044260//GO:0071704//GO:0006725//GO:0050789//GO:0008150//GO:0023052//GO:0033554//GO:0009987//GO:0006281//GO:0006139//GO:1901360//GO:0051716//GO:0044237//GO:0006950//GO:0006974//GO:0007264//GO:0007154//GO:0043170//GO:0034641//GO:0006259//GO:0065007//GO:0050896//GO:0050794//GO:0006807//GO:0035556//GO:0006310//GO:0044238//GO:0046483//GO:0090304//GO:0007165	cell surface receptor signaling pathway//metabolic process//cellular macromolecule metabolic process//organic substance metabolic process//cellular aromatic compound metabolic process//regulation of biological process//biological_process//signaling//cellular response to stress//cellular process//DNA repair//nucleobase-containing compound metabolic process//organic cyclic compound metabolic proces…	GO:0005575//GO:0043231//GO:0043227//GO:0043226//GO:0044424//GO:0043229//GO:0005623//GO:0005622//GO:0005634//GO:0044464	cellular_component//intracellular membrane-bounded organelle//membrane-bounded organelle//organelle//intracellular part//intracellular organelle//cell//intracellular//nucleus//cell part	GO:0035639//GO:0043531//GO:0032555//GO:0016787//GO:0032550//GO:0032553//GO:0005524//GO:0016791//GO:0003674//GO:0016818//GO:0036094//GO:0043167//GO:0009378//GO:0016788//GO:0019001//GO:1901363//GO:0003824//GO:0030554//GO:0098519//GO:0016462//GO:0004386//GO:0097159//GO:0005488//GO:0016817//GO:0032549//GO:0032559//GO:0043168//GO:0017076//GO:0004871//GO:0097367//GO:1901265//GO:0001882//GO:0000166//GO:…	purine ribonucleoside triphosphate binding//ADP binding//purine ribonucleotide binding//hydrolase activity//purine ribonucleoside binding//ribonucleotide binding//ATP binding//phosphatase activity//molecular_function//hydrolase activity, acting on acid anhydrides, in phosphorus-containing anhydrides//small molecule binding//ion binding//four-way junction helicase activity//hydrolase activity, act…	no KO assigned | (RefSeq) putative late blight resistance protein homolog R1B-16	http://www.genome.jp/dbget-bin/www_bget?sot:102589910	--	PREDICTED: putative late blight resistance protein homolog R1B-17-like [Solanum tuberosum]
263	Novel02057	2.34813	145.204	-5.9504	0.00010857	0.00058484	DOWN	--	--	--	--	--	--	K13495 cis-zeatin O-glucosyltransferase [EC:2.4.1.215] | (RefSeq) zeatin O-xylosyltransferase-like	http://www.genome.jp/dbget-bin/www_bget?sot:102597760	--	PREDICTED: zeatin O-glucosyltransferase-like [Solanum tuberosum]
264	Novel02063	46.6417	107.851	-1.2093	0.006326	0.019986	DOWN	--	--	--	--	--	--	no KO assigned | (RefSeq) putative GEM-like protein 8	http://www.genome.jp/dbget-bin/www_bget?sot:102584010	--	PREDICTED: putative GEM-like protein 8-like [Solanum tuberosum]
265	Novel02076	448.367	2886.13	-2.6864	4.9559e-08	5.8744e-07	DOWN	GO:0050896//GO:0050794//GO:0065007//GO:0007165//GO:0051179//GO:0044237//GO:0051716//GO:0030153//GO:0007186//GO:0055085//GO:0007154//GO:0023052//GO:0008150//GO:0006810//GO:0051234//GO:0050789//GO:0006790//GO:0009987//GO:0009404//GO:0008152//GO:0000103//GO:0019748	response to stimulus//regulation of cellular process//biological regulation//signal transduction//localization//cellular metabolic process//cellular response to stimulus//bacteriocin immunity//G-protein coupled receptor signaling pathway//transmembrane transport//cell communication//signaling//biological_process//transport//establishment of localization//regulation of biological process//sulfur c…	GO:0031224//GO:0044425//GO:0016021//GO:0016020//GO:0005575	intrinsic component of membrane//membrane part//integral component of membrane//membrane//cellular_component	GO:0005525//GO:0001883//GO:0016887//GO:0000166//GO:0001882//GO:0016772//GO:0044877//GO:0060089//GO:0032561//GO:0017111//GO:0016773//GO:0005515//GO:0042626//GO:0005215//GO:0022804//GO:0015643//GO:0003924//GO:0043168//GO:0015405//GO:0032559//GO:0032549//GO:0016817//GO:0005488//GO:0042623//GO:1901265//GO:0004871//GO:0097367//GO:0017076//GO:0030554//GO:0003824//GO:1901363//GO:0016740//GO:0019001//GO:…	GTP binding//purine nucleoside binding//ATPase activity//nucleotide binding//nucleoside binding//transferase activity, transferring phosphorus-containing groups//protein-containing complex binding//molecular transducer activity//guanyl ribonucleotide binding//nucleoside-triphosphatase activity//phosphotransferase activity, alcohol group as acceptor//protein binding//ATPase activity, coupled to tr…	K05658 ATP-binding cassette, subfamily B (MDR/TAP), member 1 [EC:3.6.3.44] | (RefSeq) ABC transporter B family member 6-like	http://www.genome.jp/dbget-bin/www_bget?sot:102605701	--	PREDICTED: ABC transporter B family member 6-like [Solanum tuberosum]
266	Novel02081	0	12.5774	#NAME?	0.0019404	0.0072819	DOWN	--	--	--	--	--	--	no KO assigned | (RefSeq) protein RAFTIN 1B-like	http://www.genome.jp/dbget-bin/www_bget?sot:102586038	--	PREDICTED: protein RAFTIN 1B-like [Solanum tuberosum]
267	Novel02085	9.78114	189.415	-4.2754	1.3066e-09	2.1562e-08	DOWN	--	--	--	--	--	--	--	--	--	--
268	Novel02086	1499.82	3142.99	-1.0674	5.4138e-05	0.00031658	DOWN	--	--	--	--	GO:0016773//GO:0005515//GO:0016772//GO:0005488//GO:0016740//GO:0003824//GO:0003674	phosphotransferase activity, alcohol group as acceptor//protein binding//transferase activity, transferring phosphorus-containing groups//binding//transferase activity//catalytic activity//molecular_function	K00914 phosphatidylinositol 3-kinase [EC:2.7.1.137] | (RefSeq) phosphatidylinositol 3-kinase, root isoform	http://www.genome.jp/dbget-bin/www_bget?sot:102588478	--	PREDICTED: phosphatidylinositol 3-kinase, root isoform-like [Solanum tuberosum]
269	Novel02087	19.358	193.83	-3.3238	2.7668e-07	2.7959e-06	DOWN	--	--	GO:0044444//GO:0005623//GO:0005622//GO:0005576//GO:0044464//GO:0044424//GO:0044421//GO:0005615//GO:0043229//GO:0009536//GO:0043226//GO:0009507//GO:0005737//GO:0043231//GO:0005575//GO:0043227	cytoplasmic part//cell//intracellular//extracellular region//cell part//intracellular part//extracellular region part//extracellular space//intracellular organelle//plastid//organelle//chloroplast//cytoplasm//intracellular membrane-bounded organelle//cellular_component//membrane-bounded organelle	GO:0001882//GO:0001883//GO:0000166//GO:0032549//GO:0032559//GO:0005488//GO:0043168//GO:0017076//GO:1901265//GO:0097367//GO:0030554//GO:1901363//GO:0097159//GO:0032550//GO:0032555//GO:0035639//GO:0005524//GO:0032553//GO:0036094//GO:0003674//GO:0043167	nucleoside binding//purine nucleoside binding//nucleotide binding//ribonucleoside binding//adenyl ribonucleotide binding//binding//anion binding//purine nucleotide binding//nucleoside phosphate binding//carbohydrate derivative binding//adenyl nucleotide binding//heterocyclic compound binding//organic cyclic compound binding//purine ribonucleoside binding//purine ribonucleotide binding//purine rib…	--	--	--	PREDICTED: uncharacterized protein LOC102586952 [Solanum tuberosum]
270	Novel02093	4643.99	14033.9	-1.5955	4.1487e-09	6.1769e-08	DOWN	GO:0008150//GO:0009987//GO:0016043//GO:0007010//GO:0006996//GO:0071840	biological_process//cellular process//cellular component organization//cytoskeleton organization//organelle organization//cellular component organization or biogenesis	--	--	GO:0008092//GO:0003674//GO:0003779//GO:0005488//GO:0005515	cytoskeletal protein binding//molecular_function//actin binding//binding//protein binding	K05768 gelsolin | (RefSeq) villin-2	http://www.genome.jp/dbget-bin/www_bget?sot:102603517	--	PREDICTED: villin-2-like [Solanum tuberosum]
271	Novel02102	120.406	253.708	-1.0753	0.0089807	0.026983	DOWN	GO:0006996//GO:0071840//GO:0007049//GO:0016043//GO:0022402//GO:0000278//GO:0009987//GO:0008150//GO:0048285//GO:0000280//GO:1903047	organelle organization//cellular component organization or biogenesis//cell cycle//cellular component organization//cell cycle process//mitotic cell cycle//cellular process//biological_process//organelle fission//nuclear division//mitotic cell cycle process	GO:0005622//GO:0005634//GO:0044464//GO:0044427//GO:0043228//GO:0005623//GO:0044422//GO:0044446//GO:0043229//GO:0005694//GO:0043232//GO:0044424//GO:0000775//GO:0043226//GO:0098687//GO:0005575//GO:0043231//GO:0043227	intracellular//nucleus//cell part//chromosomal part//non-membrane-bounded organelle//cell//organelle part//intracellular organelle part//intracellular organelle//chromosome//intracellular non-membrane-bounded organelle//intracellular part//chromosome, centromeric region//organelle//chromosomal region//cellular_component//intracellular membrane-bounded organelle//membrane-bounded organelle	--	--	--	--	--	hypothetical protein VITISV_024658 [Vitis vinifera]
272	Novel02113	125.482	296.965	-1.2428	0.00011789	0.00063014	DOWN	--	--	GO:0005575//GO:0005576	cellular_component//extracellular region	--	--	--	--	--	--
273	Novel02123	588.04	4370.35	-2.8938	3.3943e-09	5.1544e-08	DOWN	GO:2001141//GO:1901576//GO:0044260//GO:0006351//GO:0034645//GO:0071704//GO:0097659//GO:0006725//GO:1903506//GO:0051252//GO:0008152//GO:0051171//GO:0009987//GO:0080090//GO:1901362//GO:0009889//GO:0031323//GO:0044249//GO:0050789//GO:0006355//GO:0031326//GO:0008150//GO:0006357//GO:2000112//GO:0019438//GO:0019219//GO:0009059//GO:0043170//GO:0019222//GO:0006139//GO:1901360//GO:0044271//GO:0044237//GO:…	regulation of RNA biosynthetic process//organic substance biosynthetic process//cellular macromolecule metabolic process//transcription, DNA-templated//cellular macromolecule biosynthetic process//organic substance metabolic process//nucleic acid-templated transcription//cellular aromatic compound metabolic process//regulation of nucleic acid-templated transcription//regulation of RNA metabolic p…	GO:0070013//GO:0005575//GO:0043231//GO:0032991//GO:0043227//GO:0043233//GO:0044451//GO:0043226//GO:0044422//GO:0005654//GO:0043229//GO:0044446//GO:0044428//GO:0016592//GO:0044424//GO:0031981//GO:0031974//GO:0005622//GO:0005634//GO:0044464//GO:0005623	intracellular organelle lumen//cellular_component//intracellular membrane-bounded organelle//protein-containing complex//membrane-bounded organelle//organelle lumen//nucleoplasm part//organelle//organelle part//nucleoplasm//intracellular organelle//intracellular organelle part//nuclear part//mediator complex//intracellular part//nuclear lumen//membrane-enclosed lumen//intracellular//nucleus//cell…	GO:0003674//GO:0000988//GO:0003712//GO:0000989//GO:0001076	molecular_function//transcription factor activity, protein binding//transcription coregulator activity//transcription factor activity, transcription factor binding//transcription factor activity, RNA polymerase II transcription factor binding	K15164 mediator of RNA polymerase II transcription subunit 13 | (RefSeq) mediator of RNA polymerase II transcription subunit 13	http://www.genome.jp/dbget-bin/www_bget?sot:102578156	--	PREDICTED: mediator of RNA polymerase II transcription subunit 13-like isoform X1 [Solanum tuberosum]
274	Novel02124	14.8507	60.441	-2.025	0.00095797	0.0039495	DOWN	GO:0007166//GO:0002253//GO:0048583//GO:0050852//GO:0050789//GO:0002682//GO:0008150//GO:0023052//GO:0050851//GO:0002376//GO:0002757//GO:0009987//GO:0002684//GO:0051716//GO:0002764//GO:0050778//GO:0048518//GO:0002768//GO:0007154//GO:0065007//GO:0050794//GO:0050896//GO:0002429//GO:0050776//GO:0048584//GO:0006955//GO:0007165	cell surface receptor signaling pathway//activation of immune response//regulation of response to stimulus//T cell receptor signaling pathway//regulation of biological process//regulation of immune system process//biological_process//signaling//antigen receptor-mediated signaling pathway//immune system process//immune response-activating signal transduction//cellular process//positive regulation …	--	--	GO:0004721//GO:0016787//GO:0016791//GO:0003674//GO:0016788//GO:0003824//GO:0004725//GO:0042578	phosphoprotein phosphatase activity//hydrolase activity//phosphatase activity//molecular_function//hydrolase activity, acting on ester bonds//catalytic activity//protein tyrosine phosphatase activity//phosphoric ester hydrolase activity	no KO assigned | (RefSeq) uncharacterized LOC102581598	http://www.genome.jp/dbget-bin/www_bget?sot:102581598	--	PREDICTED: uncharacterized protein LOC101254418 isoform X3 [Solanum lycopersicum]
275	Novel02135	3931.25	8269.11	-1.0727	3.0434e-06	2.4145e-05	DOWN	GO:0033036//GO:0006839//GO:0034613//GO:0051649//GO:0071702//GO:0051641//GO:0046907//GO:0065002//GO:0006626//GO:0009987//GO:0008150//GO:0006605//GO:0006810//GO:0051234//GO:1990542//GO:0017038//GO:0033365//GO:0007005//GO:0008104//GO:0055085//GO:0072655//GO:0016482//GO:0006996//GO:0051179//GO:0071806//GO:0071840//GO:0015031//GO:0016043//GO:0045184//GO:0072594//GO:0006886//GO:0030150//GO:0044743//GO:…	macromolecule localization//mitochondrial transport//cellular protein localization//establishment of localization in cell//organic substance transport//cellular localization//intracellular transport//intracellular protein transmembrane transport//protein targeting to mitochondrion//cellular process//biological_process//protein targeting//transport//establishment of localization//mitochondrial tra…	GO:0005575//GO:0098805//GO:0043231//GO:0043227//GO:0016020//GO:0031968//GO:0005739//GO:0098588//GO:0044429//GO:0032991//GO:0005737//GO:0005740//GO:0031975//GO:0043226//GO:0098799//GO:0098796//GO:0005742//GO:0098798//GO:0005741//GO:0044422//GO:0044446//GO:0043229//GO:0031090//GO:0031966//GO:0044425//GO:0044424//GO:0005622//GO:0044464//GO:0044455//GO:0019867//GO:0031967//GO:0005623//GO:0044444	cellular_component//whole membrane//intracellular membrane-bounded organelle//membrane-bounded organelle//membrane//organelle outer membrane//mitochondrion//bounding membrane of organelle//mitochondrial part//protein-containing complex//cytoplasm//mitochondrial envelope//envelope//organelle//outer mitochondrial membrane protein complex//membrane protein complex//mitochondrial outer membrane trans…	--	--	K04650 nuclear receptor co-repressor 1 | (RefSeq) uncharacterized LOC102602320	http://www.genome.jp/dbget-bin/www_bget?sot:102602320	--	PREDICTED: uncharacterized protein LOC102602320 [Solanum tuberosum]
276	Novel02150	61.7097	142.807	-1.2105	0.002459	0.0089217	DOWN	--	--	--	--	GO:0043167//GO:0003674//GO:0005509//GO:0043169//GO:0005515//GO:0046872//GO:0005488	ion binding//molecular_function//calcium ion binding//cation binding//protein binding//metal ion binding//binding	K13448 calcium-binding protein CML | (RefSeq) caltractin-like	http://www.genome.jp/dbget-bin/www_bget?sot:102596357	--	PREDICTED: probable calcium-binding protein CML20-like [Solanum tuberosum]
277	Novel02167	46.0134	115.598	-1.329	0.0020145	0.0075088	DOWN	GO:0009987//GO:0006281//GO:0033554//GO:0043412//GO:0008150//GO:0006725//GO:0071704//GO:0044260//GO:0008152//GO:0090304//GO:0044238//GO:0046483//GO:0036211//GO:0006807//GO:0019538//GO:0050896//GO:0044267//GO:0006259//GO:0034641//GO:0043170//GO:0006464//GO:0006950//GO:0006974//GO:0051716//GO:0044237//GO:0006139//GO:1901360	cellular process//DNA repair//cellular response to stress//macromolecule modification//biological_process//cellular aromatic compound metabolic process//organic substance metabolic process//cellular macromolecule metabolic process//metabolic process//nucleic acid metabolic process//primary metabolic process//heterocycle metabolic process//protein modification process//nitrogen compound metabolic …	--	--	GO:0043167//GO:0003674//GO:0016151//GO:0008270//GO:0043169//GO:0046914//GO:0046872//GO:0005488	ion binding//molecular_function//nickel cation binding//zinc ion binding//cation binding//transition metal ion binding//metal ion binding//binding	K03142 transcription initiation factor TFIIH subunit 2 | (RefSeq) GTF2H2; general transcription factor IIH subunit 2-like	http://www.genome.jp/dbget-bin/www_bget?sot:102601591	--	PREDICTED: general transcription factor IIH subunit 2-like [Solanum tuberosum]
278	Novel02178	1133.15	2368.31	-1.0635	9.4359e-06	6.6493e-05	DOWN	GO:0006725//GO:0097659//GO:0071704//GO:0034645//GO:0006351//GO:0044260//GO:1901576//GO:2001141//GO:0005975//GO:0051252//GO:0008152//GO:0006400//GO:0009451//GO:1903506//GO:0080090//GO:1901362//GO:0009987//GO:0051171//GO:0006281//GO:0006396//GO:0033554//GO:0019318//GO:0019438//GO:0043412//GO:0023052//GO:0006012//GO:0008150//GO:0031326//GO:0006810//GO:0006355//GO:0051234//GO:2000112//GO:0034660//GO:…	cellular aromatic compound metabolic process//nucleic acid-templated transcription//organic substance metabolic process//cellular macromolecule biosynthetic process//transcription, DNA-templated//cellular macromolecule metabolic process//organic substance biosynthetic process//regulation of RNA biosynthetic process//carbohydrate metabolic process//regulation of RNA metabolic process//metabolic pr…	GO:0005777//GO:0043227//GO:0005575//GO:0043231//GO:0005737//GO:0043226//GO:0043229//GO:0044424//GO:0042579//GO:0044464//GO:0005576//GO:0005622//GO:0005623//GO:0044444	peroxisome//membrane-bounded organelle//cellular_component//intracellular membrane-bounded organelle//cytoplasm//organelle//intracellular organelle//intracellular part//microbody//cell part//extracellular region//intracellular//cell//cytoplasmic part	GO:0043167//GO:0003674//GO:0036094//GO:0016818//GO:0032553//GO:0005524//GO:0004553//GO:0032550//GO:0016787//GO:0043531//GO:0035639//GO:0032555//GO:0097159//GO:0016462//GO:0004565//GO:0004386//GO:0030554//GO:0003824//GO:0003676//GO:1901363//GO:0009378//GO:0003724//GO:1901265//GO:0097367//GO:0017076//GO:0015925//GO:0043168//GO:0032559//GO:0032549//GO:0016817//GO:0016798//GO:0005488//GO:0003678//GO:…	ion binding//molecular_function//small molecule binding//hydrolase activity, acting on acid anhydrides, in phosphorus-containing anhydrides//ribonucleotide binding//ATP binding//hydrolase activity, hydrolyzing O-glycosyl compounds//purine ribonucleoside binding//hydrolase activity//ADP binding//purine ribonucleoside triphosphate binding//purine ribonucleotide binding//organic cyclic compound bind…	K13338 peroxin-1 | (RefSeq) peroxisome biogenesis protein 1	http://www.genome.jp/dbget-bin/www_bget?sot:102596636	--	PREDICTED: peroxisome biogenesis protein 1-like [Solanum tuberosum]
279	Novel02199	2.75621	19.8759	-2.8503	0.010614	0.031091	DOWN	--	--	--	--	GO:0005488//GO:0005515//GO:0003674	binding//protein binding//molecular_function	no KO assigned | (RefSeq) probable leucine-rich repeat receptor-like protein kinase At1g35710	http://www.genome.jp/dbget-bin/www_bget?sot:102583509	--	PREDICTED: probable leucine-rich repeat receptor-like protein kinase At1g35710-like [Solanum tuberosum]
280	Novel02209	1406.42	3879.3	-1.4638	4.2229e-09	6.2716e-08	DOWN	GO:1903506//GO:0042742//GO:0008152//GO:0051252//GO:0043207//GO:0044260//GO:1901576//GO:2001141//GO:0097659//GO:0051707//GO:0071704//GO:0034645//GO:0006351//GO:0006725//GO:0050789//GO:0044249//GO:0031323//GO:0009889//GO:2000112//GO:0008150//GO:0031326//GO:0006355//GO:0009617//GO:0019079//GO:0019438//GO:0009607//GO:0033554//GO:0055114//GO:0006281//GO:0009987//GO:0051171//GO:1901362//GO:0080090//GO:…	regulation of nucleic acid-templated transcription//defense response to bacterium//metabolic process//regulation of RNA metabolic process//response to external biotic stimulus//cellular macromolecule metabolic process//organic substance biosynthetic process//regulation of RNA biosynthetic process//nucleic acid-templated transcription//response to other organism//organic substance metabolic proces…	--	--	GO:0032555//GO:0035639//GO:0032550//GO:0016787//GO:0005524//GO:0032553//GO:0036094//GO:0016818//GO:0003674//GO:0043167//GO:0003724//GO:0016491//GO:0009378//GO:1901363//GO:0003676//GO:0030554//GO:0003824//GO:0050662//GO:0004386//GO:0016462//GO:0097159//GO:0005488//GO:0032559//GO:0032549//GO:0016817//GO:0043168//GO:0017076//GO:0048037//GO:0097367//GO:1901265//GO:0001882//GO:0000166//GO:0016887//GO:…	purine ribonucleotide binding//purine ribonucleoside triphosphate binding//purine ribonucleoside binding//hydrolase activity//ATP binding//ribonucleotide binding//small molecule binding//hydrolase activity, acting on acid anhydrides, in phosphorus-containing anhydrides//molecular_function//ion binding//RNA helicase activity//oxidoreductase activity//four-way junction helicase activity//heterocycl…	no KO assigned | (RefSeq) ATPase family AAA domain-containing protein At1g05910	http://www.genome.jp/dbget-bin/www_bget?sot:102583998	--	PREDICTED: ATPase family AAA domain-containing protein At1g05910-like isoform X1 [Solanum tuberosum]>gi|565341839|ref|XP_006338078.1| PREDICTED: ATPase family AAA domain-containing protein At1g05910-like isoform X2 [Solanum tuberosum]
281	Novel02210	2245.23	5849.45	-1.3814	9.7506e-05	0.00053154	DOWN	GO:0009059//GO:0000226//GO:0043170//GO:1901360//GO:0006139//GO:0044271//GO:0044237//GO:0022402//GO:0006807//GO:0007010//GO:0009058//GO:0010467//GO:0006996//GO:0071840//GO:0007049//GO:0090304//GO:0016043//GO:0046483//GO:0044238//GO:0032774//GO:0034641//GO:0016070//GO:0034654//GO:0043933//GO:0018130//GO:0044260//GO:1901576//GO:0006725//GO:0006351//GO:0034645//GO:0097659//GO:0071704//GO:1903047//GO:…	macromolecule biosynthetic process//microtubule cytoskeleton organization//macromolecule metabolic process//organic cyclic compound metabolic process//nucleobase-containing compound metabolic process//cellular nitrogen compound biosynthetic process//cellular metabolic process//cell cycle process//nitrogen compound metabolic process//cytoskeleton organization//biosynthetic process//gene expression…	GO:0044422//GO:0000780//GO:0043229//GO:0044446//GO:0044454//GO:0044428//GO:0000777//GO:0005694//GO:0000794//GO:0043232//GO:0031981//GO:0044424//GO:0005622//GO:0005634//GO:0031974//GO:0044464//GO:0043228//GO:0044427//GO:0005623//GO:0005819//GO:0000942//GO:0005575//GO:0043231//GO:0042729//GO:0072686//GO:0070013//GO:0015630//GO:0043227//GO:0032991//GO:0043233//GO:0000793//GO:0000776//GO:0000779//GO:…	organelle part//condensed nuclear chromosome, centromeric region//intracellular organelle//intracellular organelle part//nuclear chromosome part//nuclear part//condensed chromosome kinetochore//chromosome//condensed nuclear chromosome//intracellular non-membrane-bounded organelle//nuclear lumen//intracellular part//intracellular//nucleus//membrane-enclosed lumen//cell part//non-membrane-bounded o…	GO:0003899//GO:0005488//GO:0005515//GO:0016772//GO:0003677//GO:0003674//GO:0016779//GO:0034062//GO:0097159//GO:0016740//GO:0003824//GO:0003676//GO:1901363	DNA-directed 5'-3' RNA polymerase activity//binding//protein binding//transferase activity, transferring phosphorus-containing groups//DNA binding//molecular_function//nucleotidyltransferase activity//5'-3' RNA polymerase activity//organic cyclic compound binding//transferase activity//catalytic activity//nucleic acid binding//heterocyclic compound binding	no KO assigned | (RefSeq) BEACH domain-containing protein B	http://www.genome.jp/dbget-bin/www_bget?sot:102600723	--	PREDICTED: BEACH domain-containing protein lvsC-like isoform X1 [Solanum tuberosum]
282	Novel02213	688.162	1380.42	-1.0043	4.1156e-05	0.00024754	DOWN	GO:0009987//GO:0008037//GO:0048544//GO:0006796//GO:0043412//GO:0009856//GO:0008150//GO:0071704//GO:0044706//GO:0044260//GO:0008152//GO:0006793//GO:0044238//GO:0006468//GO:0036211//GO:0019538//GO:0044267//GO:0032501//GO:0009875//GO:0016310//GO:0007154//GO:0043170//GO:0044703//GO:0022414//GO:0006464//GO:0051704//GO:0044237	cellular process//cell recognition//recognition of pollen//phosphate-containing compound metabolic process//macromolecule modification//pollination//biological_process//organic substance metabolic process//multi-multicellular organism process//cellular macromolecule metabolic process//metabolic process//phosphorus metabolic process//primary metabolic process//protein phosphorylation//protein modi…	--	--	GO:0097159//GO:0003824//GO:0030554//GO:1901363//GO:0016740//GO:0043167//GO:0003674//GO:0036094//GO:0032553//GO:0005524//GO:0016301//GO:0032550//GO:0035639//GO:0032555//GO:0004674//GO:0016773//GO:0001883//GO:0000166//GO:0001882//GO:0016772//GO:0004672//GO:1901265//GO:0097367//GO:0017076//GO:0043168//GO:0032549//GO:0032559//GO:0005488	organic cyclic compound binding//catalytic activity//adenyl nucleotide binding//heterocyclic compound binding//transferase activity//ion binding//molecular_function//small molecule binding//ribonucleotide binding//ATP binding//kinase activity//purine ribonucleoside binding//purine ribonucleoside triphosphate binding//purine ribonucleotide binding//protein serine/threonine kinase activity//phospho…	no KO assigned | (RefSeq) G-type lectin S-receptor-like serine/threonine-protein kinase At4g27290	http://www.genome.jp/dbget-bin/www_bget?sot:102604991	--	PREDICTED: G-type lectin S-receptor-like serine/threonine-protein kinase At4g27290-like isoform X1 [Solanum tuberosum]
283	Novel02214	56.3884	888.664	-3.9782	7.8251e-07	7.2012e-06	DOWN	GO:0044237//GO:0051704//GO:0006464//GO:0016310//GO:0032501//GO:0009875//GO:0044703//GO:0022414//GO:0043170//GO:0007154//GO:0044267//GO:0019538//GO:0036211//GO:0044238//GO:0006468//GO:0006793//GO:0008152//GO:0044260//GO:0044706//GO:0071704//GO:0008150//GO:0043412//GO:0009856//GO:0008037//GO:0006796//GO:0048544//GO:0009987	cellular metabolic process//multi-organism process//cellular protein modification process//phosphorylation//multicellular organismal process//pollen-pistil interaction//multi-organism reproductive process//reproductive process//macromolecule metabolic process//cell communication//cellular protein metabolic process//protein metabolic process//protein modification process//primary metabolic process…	--	--	GO:0032549//GO:0032559//GO:0005488//GO:0043168//GO:0017076//GO:1901265//GO:0097367//GO:0016772//GO:0001882//GO:0004672//GO:0001883//GO:0000166//GO:0016773//GO:0004674//GO:0032550//GO:0032555//GO:0035639//GO:0005524//GO:0032553//GO:0016301//GO:0036094//GO:0003674//GO:0043167//GO:0016740//GO:0003824//GO:0030554//GO:1901363//GO:0097159	ribonucleoside binding//adenyl ribonucleotide binding//binding//anion binding//purine nucleotide binding//nucleoside phosphate binding//carbohydrate derivative binding//transferase activity, transferring phosphorus-containing groups//nucleoside binding//protein kinase activity//purine nucleoside binding//nucleotide binding//phosphotransferase activity, alcohol group as acceptor//protein serine/th…	no KO assigned | (RefSeq) G-type lectin S-receptor-like serine/threonine-protein kinase At4g27290	http://www.genome.jp/dbget-bin/www_bget?sot:102604991	--	PREDICTED: LOW QUALITY PROTEIN: G-type lectin S-receptor-like serine/threonine-protein kinase At4g27290 [Solanum lycopersicum]
284	Novel02219	3.86914	29.2507	-2.9184	0.0024937	0.0090294	DOWN	--	--	--	--	--	--	K05387 glutamate receptor, ionotropic, plant | (RefSeq) glutamate receptor 2.9-like	http://www.genome.jp/dbget-bin/www_bget?sot:102596125	--	PREDICTED: glutamate receptor 2.9-like [Solanum tuberosum]
285	Novel02223	13.9297	54.5059	-1.9682	0.0018004	0.0068203	DOWN	--	--	--	--	GO:0005488//GO:0003677//GO:0003674//GO:0009055//GO:0097159//GO:1901363//GO:0003676	binding//DNA binding//molecular_function//electron transfer activity//organic cyclic compound binding//heterocyclic compound binding//nucleic acid binding	no KO assigned | (RefSeq) B3 domain-containing protein Os01g0723500-like	http://www.genome.jp/dbget-bin/www_bget?sot:102589909	--	PREDICTED: B3 domain-containing protein Os01g0723500-like isoform X3 [Nicotiana sylvestris]
286	Novel02230	0.655185	29.0545	-5.4707	1.3474e-05	9.1224e-05	DOWN	--	--	--	--	--	--	--	--	--	--
287	Novel02234	48.8786	654.449	-3.743	1.8289e-06	1.5295e-05	DOWN	--	--	--	--	GO:0016788//GO:0003824//GO:0016787//GO:0016791//GO:0003674//GO:0042578	hydrolase activity, acting on ester bonds//catalytic activity//hydrolase activity//phosphatase activity//molecular_function//phosphoric ester hydrolase activity	no KO assigned | (RefSeq) uncharacterized LOC102593697	http://www.genome.jp/dbget-bin/www_bget?sot:102593697	--	PREDICTED: uncharacterized protein LOC102593697 [Solanum tuberosum]
288	Novel02235	525.625	2783	-2.4045	1.7783e-12	4.9618e-11	DOWN	--	--	--	--	--	--	no KO assigned | (RefSeq) zinc finger CCCH domain-containing protein 53-like	http://www.genome.jp/dbget-bin/www_bget?sot:102596190	--	PREDICTED: zinc finger CCCH domain-containing protein 53-like [Solanum lycopersicum]
289	Novel02240	966.933	2663.08	-1.4616	1.5271e-07	1.6238e-06	DOWN	--	--	--	--	GO:0005488//GO:0005515//GO:0003674	binding//protein binding//molecular_function	K12600 superkiller protein 3 | (RefSeq) tetratricopeptide repeat protein SKI3	http://www.genome.jp/dbget-bin/www_bget?sot:102592859	--	PREDICTED: tetratricopeptide repeat protein 37-like [Solanum tuberosum]
290	Novel02246	0.686169	28.2861	-5.3654	1.6135e-05	0.00010702	DOWN	--	--	--	--	--	--	no KO assigned | (RefSeq) uncharacterized LOC102595311	http://www.genome.jp/dbget-bin/www_bget?sot:102595311	--	PREDICTED: uncharacterized protein LOC102595311 [Solanum tuberosum]
291	Novel02279	61.8617	940.825	-3.9268	2.4394e-12	6.6624e-11	DOWN	--	--	--	--	GO:0005515//GO:0005488//GO:0003674	protein binding//binding//molecular_function	K09527 DnaJ homolog subfamily C member 7 | (RefSeq) uncharacterized LOC102595261	http://www.genome.jp/dbget-bin/www_bget?sot:102595261	--	PREDICTED: uncharacterized protein LOC102595261 [Solanum tuberosum]
292	Novel02291	11.1644	90.3058	-3.0159	9.0891e-08	1.0213e-06	DOWN	--	--	--	--	--	--	no KO assigned | (RefSeq) uncharacterized LOC102583464	http://www.genome.jp/dbget-bin/www_bget?sot:102583464	--	PREDICTED: F-box/FBD/LRR-repeat protein At1g13570-like isoform X1 [Solanum tuberosum]
293	Novel02302	2287.77	5392.11	-1.2369	1.2519e-07	1.3585e-06	DOWN	--	--	--	--	GO:0043167//GO:0003674//GO:0016818//GO:0036094//GO:0032553//GO:0035639//GO:0032555//GO:0016787//GO:0008270//GO:0032550//GO:0016462//GO:0097159//GO:0004518//GO:0003676//GO:1901363//GO:0003824//GO:0019001//GO:0016788//GO:0046872//GO:0097367//GO:1901265//GO:0004527//GO:0017076//GO:0003924//GO:0043168//GO:0005488//GO:0016817//GO:0032549//GO:0032561//GO:0043169//GO:0046914//GO:0017111//GO:0000166//GO:…	ion binding//molecular_function//hydrolase activity, acting on acid anhydrides, in phosphorus-containing anhydrides//small molecule binding//ribonucleotide binding//purine ribonucleoside triphosphate binding//purine ribonucleotide binding//hydrolase activity//zinc ion binding//purine ribonucleoside binding//pyrophosphatase activity//organic cyclic compound binding//nuclease activity//nucleic acid…	K20553 5'-3' exoribonuclease 4 [EC:3.1.13.-] | (RefSeq) 5'-3' exoribonuclease 4	http://www.genome.jp/dbget-bin/www_bget?sot:102604337	--	PREDICTED: 5'-3' exoribonuclease 4-like isoform X1 [Solanum tuberosum]>gi|565345954|ref|XP_006340039.1| PREDICTED: 5'-3' exoribonuclease 4-like isoform X2 [Solanum tuberosum]
294	Novel02303	1103.3	3026.36	-1.4558	1.1453e-05	7.9077e-05	DOWN	--	--	--	--	GO:0005488//GO:0003677//GO:0003674//GO:0003676//GO:1901363//GO:0097159	binding//DNA binding//molecular_function//nucleic acid binding//heterocyclic compound binding//organic cyclic compound binding	K15601 lysine-specific demethylase 3 [EC:1.14.11.-] | (RefSeq) lysine-specific demethylase JMJ25-like	http://www.genome.jp/dbget-bin/www_bget?sot:102601654	--	PREDICTED: uncharacterized protein LOC102601654 [Solanum tuberosum]
295	Novel02305	152.566	413.356	-1.4379	1.7779e-06	1.4894e-05	DOWN	GO:0044237//GO:0033014//GO:1901360//GO:0044271//GO:0018130//GO:0034641//GO:0046483//GO:0006807//GO:0009058//GO:0008152//GO:0033013//GO:0006725//GO:0071704//GO:1901576//GO:0019438//GO:1901564//GO:0008150//GO:0044249//GO:1901566//GO:1901362//GO:0009987	cellular metabolic process//tetrapyrrole biosynthetic process//organic cyclic compound metabolic process//cellular nitrogen compound biosynthetic process//heterocycle biosynthetic process//cellular nitrogen compound metabolic process//heterocycle metabolic process//nitrogen compound metabolic process//biosynthetic process//metabolic process//tetrapyrrole metabolic process//cellular aromatic compo…	--	--	GO:0016835//GO:0004852//GO:0016829//GO:0003674//GO:0003824//GO:0016836	carbon-oxygen lyase activity//uroporphyrinogen-III synthase activity//lyase activity//molecular_function//catalytic activity//hydro-lyase activity	K01719 uroporphyrinogen-III synthase [EC:4.2.1.75] | (RefSeq) uroporphyrinogen-III synthase, chloroplastic-like	http://www.genome.jp/dbget-bin/www_bget?sot:102585870	--	PREDICTED: uroporphyrinogen-III synthase, chloroplastic-like [Solanum tuberosum]
296	Novel02319	19.938	64.305	-1.6894	0.0036029	0.012374	DOWN	--	--	--	--	--	--	--	--	--	--
297	Novel02338	4832.36	10715.6	-1.1489	0.0099829	0.029534	DOWN	GO:0008150//GO:0051234//GO:0006810//GO:0009987//GO:0055085//GO:0051179	biological_process//establishment of localization//transport//cellular process//transmembrane transport//localization	GO:0005737//GO:0005575//GO:0005852//GO:0016020//GO:0032991//GO:0044425//GO:0044424//GO:0016021//GO:0005623//GO:0044444//GO:0005622//GO:0031224//GO:0044464	cytoplasm//cellular_component//eukaryotic translation initiation factor 3 complex//membrane//protein-containing complex//membrane part//intracellular part//integral component of membrane//cell//cytoplasmic part//intracellular//intrinsic component of membrane//cell part	GO:0016787//GO:0032550//GO:0035639//GO:0032555//GO:0032553//GO:0005524//GO:0003674//GO:0016818//GO:0036094//GO:0015399//GO:0003743//GO:0043167//GO:0008135//GO:0022857//GO:0030554//GO:0003824//GO:0003676//GO:1901363//GO:0043492//GO:0097159//GO:0016462//GO:0032559//GO:0016817//GO:0032549//GO:0005488//GO:0042623//GO:0043168//GO:0015405//GO:0017076//GO:1901265//GO:0097367//GO:0001882//GO:0001883//GO:…	hydrolase activity//purine ribonucleoside binding//purine ribonucleoside triphosphate binding//purine ribonucleotide binding//ribonucleotide binding//ATP binding//molecular_function//hydrolase activity, acting on acid anhydrides, in phosphorus-containing anhydrides//small molecule binding//primary active transmembrane transporter activity//translation initiation factor activity//ion binding//tran…	no KO assigned | (RefSeq) ABC transporter D family member 1	http://www.genome.jp/dbget-bin/www_bget?sot:102587630	--	PREDICTED: ABC transporter D family member 1-like isoform X1 [Solanum tuberosum]>gi|565377792|ref|XP_006355352.1| PREDICTED: ABC transporter D family member 1-like isoform X2 [Solanum tuberosum]
298	Novel02348	14.7785	81.8673	-2.4698	1.0058e-05	7.029e-05	DOWN	GO:0009987//GO:0006396//GO:0008033//GO:0008150//GO:0034660//GO:0043412//GO:0044260//GO:0071704//GO:0006725//GO:0009451//GO:0006400//GO:0008152//GO:0010467//GO:0006807//GO:0034470//GO:0044238//GO:0046483//GO:0090304//GO:0034641//GO:0016070//GO:0043170//GO:0006399//GO:1901360//GO:0006139//GO:0044237	cellular process//RNA processing//tRNA processing//biological_process//ncRNA metabolic process//macromolecule modification//cellular macromolecule metabolic process//organic substance metabolic process//cellular aromatic compound metabolic process//RNA modification//tRNA modification//metabolic process//gene expression//nitrogen compound metabolic process//ncRNA processing//primary metabolic proc…	--	--	GO:0016740//GO:0003824//GO:0008193//GO:0016779//GO:0003674//GO:0043167//GO:0000287//GO:0070568//GO:0043169//GO:0016772//GO:0008192//GO:0046872//GO:0005488	transferase activity//catalytic activity//tRNA guanylyltransferase activity//nucleotidyltransferase activity//molecular_function//ion binding//magnesium ion binding//guanylyltransferase activity//cation binding//transferase activity, transferring phosphorus-containing groups//RNA guanylyltransferase activity//metal ion binding//binding	no KO assigned | (RefSeq) uncharacterized LOC102587556	http://www.genome.jp/dbget-bin/www_bget?sot:102587556	--	PREDICTED: tRNA(His) guanylyltransferase 1-like [Solanum tuberosum]
299	Novel02349	625.212	3636.76	-2.5402	3.9999e-05	0.00024121	DOWN	--	--	--	--	--	--	K19026 spatacsin | (RefSeq) protein DDB_G0268328-like	http://www.genome.jp/dbget-bin/www_bget?sot:102604855	--	PREDICTED: uncharacterized protein LOC101246131 [Solanum lycopersicum]
300	Novel02354	3.11327	22.7794	-2.8712	0.0069137	0.021542	DOWN	--	--	--	--	--	--	--	--	--	--
301	Novel02363	824.274	2275.14	-1.4648	1.9984e-09	3.1785e-08	DOWN	--	--	--	--	--	--	--	--	--	--
302	Novel02368	32.8827	250.937	-2.9319	3.3991e-14	1.2144e-12	DOWN	--	--	--	--	GO:0005488//GO:0046872//GO:0046914//GO:0005515//GO:0043169//GO:0008270//GO:0003674//GO:0043167	binding//metal ion binding//transition metal ion binding//protein binding//cation binding//zinc ion binding//molecular_function//ion binding	K16282 E3 ubiquitin-protein ligase RHA2 [EC:2.3.2.27] | (RefSeq) probable E3 ubiquitin-protein ligase RHA2B	http://www.genome.jp/dbget-bin/www_bget?sot:102581773	--	PREDICTED: RING-H2 finger protein ATL56-like [Nicotiana tomentosiformis]
303	Novel02370	84.1703	175.871	-1.0631	0.0029672	0.010461	DOWN	--	--	--	--	--	--	no KO assigned | (RefSeq) subtilisin-like protease SBT1.2	http://www.genome.jp/dbget-bin/www_bget?sot:102584545	--	PREDICTED: subtilisin-like protease [Nicotiana sylvestris]
304	Novel02376	9220.84	35847.3	-1.9589	0.0058264	0.018623	DOWN	--	--	--	--	GO:0005488//GO:0019787//GO:0005515//GO:0004842//GO:0005179//GO:0003674//GO:0005102//GO:0003824//GO:0016740	binding//ubiquitin-like protein transferase activity//protein binding//ubiquitin-protein transferase activity//hormone activity//molecular_function//signaling receptor binding//catalytic activity//transferase activity	K10592 E3 ubiquitin-protein ligase HUWE1 [EC:2.3.2.26] | (RefSeq) E3 ubiquitin-protein ligase UPL1-like	http://www.genome.jp/dbget-bin/www_bget?sot:102596804	--	PREDICTED: E3 ubiquitin-protein ligase UPL1-like [Solanum tuberosum]
305	Novel02383	706.505	2381.69	-1.7532	8.2891e-13	2.4516e-11	DOWN	--	--	--	--	GO:0003674//GO:0097159//GO:0003676//GO:1901363//GO:0005488	molecular_function//organic cyclic compound binding//nucleic acid binding//heterocyclic compound binding//binding	K18667 activating signal cointegrator complex subunit 2 | (RefSeq) uncharacterized LOC102600101	http://www.genome.jp/dbget-bin/www_bget?sot:102600101	--	PREDICTED: uncharacterized protein LOC102600101 [Solanum tuberosum]
306	Novel02386	502.299	2251.97	-2.1646	2.1754e-18	1.4611e-16	DOWN	GO:0044238//GO:0006629//GO:0071704//GO:0008152//GO:0008150	primary metabolic process//lipid metabolic process//organic substance metabolic process//metabolic process//biological_process	--	--	--	--	no KO assigned | (RefSeq) patatin-like protein 3	http://www.genome.jp/dbget-bin/www_bget?sot:102606222	--	PREDICTED: patatin-3-Kuras 1-like [Solanum tuberosum]
307	Novel02400	2416.05	6212.48	-1.3625	4.2448e-09	6.2979e-08	DOWN	GO:0016310//GO:0043170//GO:0006464//GO:0044237//GO:0036211//GO:0006468//GO:0044238//GO:0019538//GO:0044267//GO:0071704//GO:0044260//GO:0008152//GO:0006793//GO:0009987//GO:0006796//GO:0043412//GO:0008150	phosphorylation//macromolecule metabolic process//cellular protein modification process//cellular metabolic process//protein modification process//protein phosphorylation//primary metabolic process//protein metabolic process//cellular protein metabolic process//organic substance metabolic process//cellular macromolecule metabolic process//metabolic process//phosphorus metabolic process//cellular …	--	--	GO:1901265//GO:0097367//GO:0017076//GO:0043168//GO:0032559//GO:0032549//GO:0005488//GO:0016773//GO:0001883//GO:0000166//GO:0016772//GO:0001882//GO:0004672//GO:0043167//GO:0036094//GO:0003674//GO:0005524//GO:0032553//GO:0016301//GO:0032550//GO:0032555//GO:0035639//GO:0097159//GO:0030554//GO:0003824//GO:1901363//GO:0016740	nucleoside phosphate binding//carbohydrate derivative binding//purine nucleotide binding//anion binding//adenyl ribonucleotide binding//ribonucleoside binding//binding//phosphotransferase activity, alcohol group as acceptor//purine nucleoside binding//nucleotide binding//transferase activity, transferring phosphorus-containing groups//nucleoside binding//protein kinase activity//ion binding//smal…	no KO assigned | (RefSeq) serine/threonine-protein kinase dst1	http://www.genome.jp/dbget-bin/www_bget?sot:102591004	--	PREDICTED: serine/threonine-protein kinase dst1-like [Solanum tuberosum]
308	Novel02406	344.327	851.032	-1.3054	7.2345e-07	6.7014e-06	DOWN	--	--	GO:0044425//GO:0016021//GO:0031224//GO:0016020//GO:0005575	membrane part//integral component of membrane//intrinsic component of membrane//membrane//cellular_component	GO:0043168//GO:0032549//GO:0032559//GO:0005488//GO:1901265//GO:0097367//GO:0017076//GO:0001883//GO:0000166//GO:0001882//GO:0032553//GO:0032550//GO:0043531//GO:0032555//GO:0043167//GO:0003674//GO:0036094//GO:0030554//GO:1901363//GO:0097159	anion binding//ribonucleoside binding//adenyl ribonucleotide binding//binding//nucleoside phosphate binding//carbohydrate derivative binding//purine nucleotide binding//purine nucleoside binding//nucleotide binding//nucleoside binding//ribonucleotide binding//purine ribonucleoside binding//ADP binding//purine ribonucleotide binding//ion binding//molecular_function//small molecule binding//adenyl …	no KO assigned | (RefSeq) putative late blight resistance protein homolog R1B-12	http://www.genome.jp/dbget-bin/www_bget?sot:102585344	--	PREDICTED: putative late blight resistance protein homolog R1B-12-like isoform X1 [Solanum tuberosum]>gi|565393759|ref|XP_006362538.1| PREDICTED: putative late blight resistance protein homolog R1B-12-like isoform X2 [Solanum tuberosum]>gi|565393765|ref|XP_006362541.1| PREDICTED: putative late blight resistance protein homolog R1B-12-like isoform X5 [Solanum tuberosum]>gi|565393767|ref|XP_0063625…
309	Novel02408	207.029	732.277	-1.8226	2.8389e-11	6.4485e-10	DOWN	--	--	--	--	GO:0005515//GO:0001883//GO:0000166//GO:0001882//GO:1901265//GO:0097367//GO:0017076//GO:0043168//GO:0032549//GO:0032559//GO:0005488//GO:0097159//GO:0030554//GO:1901363//GO:0043167//GO:0003674//GO:0036094//GO:0032553//GO:0005524//GO:0032550//GO:0035639//GO:0043531//GO:0032555	protein binding//purine nucleoside binding//nucleotide binding//nucleoside binding//nucleoside phosphate binding//carbohydrate derivative binding//purine nucleotide binding//anion binding//ribonucleoside binding//adenyl ribonucleotide binding//binding//organic cyclic compound binding//adenyl nucleotide binding//heterocyclic compound binding//ion binding//molecular_function//small molecule binding…	no KO assigned | (RefSeq) disease resistance protein RPP13-like	http://www.genome.jp/dbget-bin/www_bget?sot:102596725	--	PREDICTED: putative late blight resistance protein homolog R1B-12-like [Solanum tuberosum]
310	Novel02414	24.0842	516.106	-4.4215	0.0051821	0.01685	DOWN	--	--	--	--	GO:0004521//GO:0003723//GO:0033897//GO:0004519//GO:0005488//GO:0004540//GO:0003824//GO:0003676//GO:1901363//GO:0016788//GO:0097159//GO:0004518//GO:0016787//GO:0016894//GO:0016892//GO:0003674	endoribonuclease activity//RNA binding//ribonuclease T2 activity//endonuclease activity//binding//ribonuclease activity//catalytic activity//nucleic acid binding//heterocyclic compound binding//hydrolase activity, acting on ester bonds//organic cyclic compound binding//nuclease activity//hydrolase activity//endonuclease activity, active with either ribo- or deoxyribonucleic acids and producing 3'…	K01166 ribonuclease T2 [EC:3.1.27.1] | (RefSeq) rnase; intracellular ribonuclease LX	http://www.genome.jp/dbget-bin/www_bget?sot:102600839	--	PREDICTED: intracellular ribonuclease LX-like [Solanum tuberosum]
311	Novel02422	104.142	263.752	-1.3406	4.2702e-05	0.00025585	DOWN	GO:0009311//GO:0008152//GO:0044262//GO:0071704//GO:0005984//GO:0005975//GO:1901576//GO:0046351//GO:0016051//GO:0008150//GO:0044249//GO:0009987//GO:0009312//GO:0044237//GO:0005992//GO:0005991//GO:0034637//GO:0044238//GO:0009058	oligosaccharide metabolic process//metabolic process//cellular carbohydrate metabolic process//organic substance metabolic process//disaccharide metabolic process//carbohydrate metabolic process//organic substance biosynthetic process//disaccharide biosynthetic process//carbohydrate biosynthetic process//biological_process//cellular biosynthetic process//cellular process//oligosaccharide biosynth…	--	--	GO:0003674//GO:0003824	molecular_function//catalytic activity	K16055 trehalose 6-phosphate synthase/phosphatase [EC:2.4.1.15 3.1.3.12] | (RefSeq) probable alpha,alpha-trehalose-phosphate synthase [UDP-forming] 9	http://www.genome.jp/dbget-bin/www_bget?sot:102586734	--	PREDICTED: probable alpha,alpha-trehalose-phosphate synthase [UDP-forming] 9-like [Solanum tuberosum]
312	Novel02423	28.7952	95.2494	-1.7259	0.00041756	0.0019231	DOWN	GO:0044237//GO:0005992//GO:0005991//GO:0034637//GO:0044238//GO:0009058//GO:0009311//GO:0008152//GO:0044262//GO:0071704//GO:0005984//GO:1901576//GO:0005975//GO:0046351//GO:0008150//GO:0016051//GO:0044249//GO:0009987//GO:0009312	cellular metabolic process//trehalose biosynthetic process//trehalose metabolic process//cellular carbohydrate biosynthetic process//primary metabolic process//biosynthetic process//oligosaccharide metabolic process//metabolic process//cellular carbohydrate metabolic process//organic substance metabolic process//disaccharide metabolic process//organic substance biosynthetic process//carbohydrate …	--	--	GO:0003674//GO:0003824	molecular_function//catalytic activity	K16055 trehalose 6-phosphate synthase/phosphatase [EC:2.4.1.15 3.1.3.12] | (RefSeq) probable alpha,alpha-trehalose-phosphate synthase [UDP-forming] 9	http://www.genome.jp/dbget-bin/www_bget?sot:102586734	--	PREDICTED: probable alpha,alpha-trehalose-phosphate synthase [UDP-forming] 9 [Solanum lycopersicum]
313	Novel02428	21.8073	168.097	-2.9464	7.2508e-08	8.2984e-07	DOWN	--	--	--	--	--	--	--	--	--	--
314	Novel02429	632.787	3189.84	-2.3337	2.9646e-08	3.6996e-07	DOWN	GO:0065009//GO:0090304//GO:0046483//GO:0044238//GO:0006310//GO:0006807//GO:0050896//GO:0065007//GO:0006259//GO:0034641//GO:0019222//GO:0043170//GO:0006974//GO:0006950//GO:0051716//GO:0044237//GO:1901360//GO:0006139//GO:0006281//GO:0009987//GO:0033554//GO:0008150//GO:0050789//GO:0006725//GO:0071704//GO:0044260//GO:0008152//GO:0050790	regulation of molecular function//nucleic acid metabolic process//heterocycle metabolic process//primary metabolic process//DNA recombination//nitrogen compound metabolic process//response to stimulus//biological regulation//DNA metabolic process//cellular nitrogen compound metabolic process//regulation of metabolic process//macromolecule metabolic process//cellular response to DNA damage stimulu…	--	--	GO:0003678//GO:0017111//GO:0004197//GO:0005515//GO:0001883//GO:0000166//GO:0001882//GO:1901265//GO:0097367//GO:0017076//GO:0008233//GO:0043168//GO:0032549//GO:0016817//GO:0032559//GO:0005488//GO:0097159//GO:0070011//GO:0004386//GO:0016462//GO:0003824//GO:0030554//GO:1901363//GO:0009378//GO:0043167//GO:0036094//GO:0016818//GO:0008234//GO:0003674//GO:0005524//GO:0032553//GO:0032550//GO:0016787//GO:…	DNA helicase activity//nucleoside-triphosphatase activity//cysteine-type endopeptidase activity//protein binding//purine nucleoside binding//nucleotide binding//nucleoside binding//nucleoside phosphate binding//carbohydrate derivative binding//purine nucleotide binding//peptidase activity//anion binding//ribonucleoside binding//hydrolase activity, acting on acid anhydrides//adenyl ribonucleotide …	no KO assigned | (RefSeq) putative late blight resistance protein homolog R1B-23	http://www.genome.jp/dbget-bin/www_bget?sot:102596100	--	PREDICTED: putative late blight resistance protein homolog R1A-4 isoform X1 [Solanum lycopersicum]>gi|723698834|ref|XP_010320925.1| PREDICTED: putative late blight resistance protein homolog R1A-4 isoform X1 [Solanum lycopersicum]
315	Novel02432	64.2653	286.118	-2.1545	1.163e-09	1.943e-08	DOWN	GO:0043412//GO:0008150//GO:0006643//GO:0046474//GO:0006664//GO:0044249//GO:0009987//GO:0019637//GO:0008610//GO:0006796//GO:0008152//GO:0006661//GO:0006793//GO:1901137//GO:0006650//GO:0006505//GO:0006725//GO:0071704//GO:0034645//GO:0009247//GO:0006506//GO:0015074//GO:1901576//GO:0044260//GO:0046486//GO:0044267//GO:1901135//GO:0006629//GO:0006259//GO:0042157//GO:0034641//GO:0090407//GO:0090304//GO:…	macromolecule modification//biological_process//membrane lipid metabolic process//glycerophospholipid biosynthetic process//glycolipid metabolic process//cellular biosynthetic process//cellular process//organophosphate metabolic process//lipid biosynthetic process//phosphate-containing compound metabolic process//metabolic process//phosphatidylinositol biosynthetic process//phosphorus metabolic p…	GO:0016020//GO:0005575//GO:0031224//GO:0044425	membrane//cellular_component//intrinsic component of membrane//membrane part	GO:0003676//GO:1901363//GO:0097159//GO:0008270//GO:0043167//GO:0003674//GO:0043169//GO:0046914//GO:0005488//GO:0046872	nucleic acid binding//heterocyclic compound binding//organic cyclic compound binding//zinc ion binding//ion binding//molecular_function//cation binding//transition metal ion binding//binding//metal ion binding	no KO assigned | (RefSeq) putative F-box/LRR-repeat protein At5g02930	http://www.genome.jp/dbget-bin/www_bget?sot:102585642	--	PREDICTED: uncharacterized protein LOC101255821 [Solanum lycopersicum]
316	Novel02433	0.343085	13.3178	-5.2787	0.0044797	0.014868	DOWN	GO:0006855//GO:0015893//GO:0009987//GO:0042221//GO:0008150//GO:0051234//GO:0006810//GO:0051179//GO:0050896//GO:0042493//GO:0055085	drug transmembrane transport//drug transport//cellular process//response to chemical//biological_process//establishment of localization//transport//localization//response to stimulus//response to drug//transmembrane transport	GO:0016020//GO:0005575	membrane//cellular_component	GO:0015238//GO:0022857//GO:0015291//GO:0003674//GO:0015297//GO:0005215//GO:0022804	drug transmembrane transporter activity//transmembrane transporter activity//secondary active transmembrane transporter activity//molecular_function//antiporter activity//transporter activity//active transmembrane transporter activity	K03327 multidrug resistance protein, MATE family | (RefSeq) protein DETOXIFICATION 29-like	http://www.genome.jp/dbget-bin/www_bget?sot:102583444	--	PREDICTED: protein TRANSPARENT TESTA 12-like isoform X1 [Solanum tuberosum]
317	Novel02444	7.57563	41.3509	-2.4485	0.0016335	0.006268	DOWN	--	--	--	--	--	--	--	--	--	Retrotransposon gag protein [Solanum demissum]
318	Novel02449	428.105	1013.38	-1.2431	1.259e-06	1.1033e-05	DOWN	GO:0044237//GO:1901360//GO:0006139//GO:0043170//GO:0009059//GO:0034641//GO:0006259//GO:0044238//GO:0046483//GO:0090304//GO:0051179//GO:0009058//GO:0006807//GO:0008152//GO:0034645//GO:0071704//GO:0006725//GO:0044260//GO:1901576//GO:0044249//GO:0006810//GO:0051234//GO:0008150//GO:0009987//GO:0006260	cellular metabolic process//organic cyclic compound metabolic process//nucleobase-containing compound metabolic process//macromolecule metabolic process//macromolecule biosynthetic process//cellular nitrogen compound metabolic process//DNA metabolic process//primary metabolic process//heterocycle metabolic process//nucleic acid metabolic process//localization//biosynthetic process//nitrogen compo…	GO:0016020//GO:0005575	membrane//cellular_component	GO:0043168//GO:0003924//GO:0005488//GO:0032549//GO:0016817//GO:0032559//GO:0097367//GO:1901265//GO:0017076//GO:0016887//GO:0000166//GO:0001883//GO:0005525//GO:0016772//GO:0001882//GO:0032561//GO:0003678//GO:0017111//GO:0016301//GO:0005524//GO:0032553//GO:0032555//GO:0035639//GO:0032550//GO:0016787//GO:0043167//GO:0036094//GO:0016818//GO:0003674//GO:1901363//GO:0003824//GO:0030554//GO:0016740//GO:…	anion binding//GTPase activity//binding//ribonucleoside binding//hydrolase activity, acting on acid anhydrides//adenyl ribonucleotide binding//carbohydrate derivative binding//nucleoside phosphate binding//purine nucleotide binding//ATPase activity//nucleotide binding//purine nucleoside binding//GTP binding//transferase activity, transferring phosphorus-containing groups//nucleoside binding//guan…	no KO assigned | (RefSeq) ABC transporter G family member 32	http://www.genome.jp/dbget-bin/www_bget?sot:102595583	--	PREDICTED: ABC transporter G family member 32-like [Solanum tuberosum]
319	Novel02451	377.14	2582.84	-2.7758	1.1366e-10	2.3079e-09	DOWN	GO:0034622//GO:0065003//GO:0043933//GO:0044085//GO:0022607//GO:0071840//GO:0016043//GO:0043248//GO:0070271//GO:0008150//GO:0009987	cellular protein-containing complex assembly//protein-containing complex assembly//protein-containing complex subunit organization//cellular component biogenesis//cellular component assembly//cellular component organization or biogenesis//cellular component organization//proteasome assembly//obsolete protein complex biogenesis//biological_process//cellular process	--	--	GO:0005488//GO:0005515//GO:0003674	binding//protein binding//molecular_function	no KO assigned | (RefSeq) uncharacterized LOC102601188	http://www.genome.jp/dbget-bin/www_bget?sot:102601188	--	PREDICTED: uncharacterized protein LOC102601188 isoform X2 [Solanum tuberosum]
320	Novel02480	59.633	174.342	-1.5477	0.00011683	0.00062526	DOWN	GO:0051179//GO:0055085//GO:0006811//GO:0009987//GO:0008150//GO:0006810//GO:0051234	localization//transmembrane transport//ion transport//cellular process//biological_process//transport//establishment of localization	GO:0005575//GO:0016020	cellular_component//membrane	GO:0005215//GO:0022838//GO:0015075//GO:0022803//GO:0016740//GO:0016747//GO:0022857//GO:0003824//GO:0003674//GO:0005216//GO:0016746//GO:0015267	transporter activity//substrate-specific channel activity//ion transmembrane transporter activity//passive transmembrane transporter activity//transferase activity//transferase activity, transferring acyl groups other than amino-acyl groups//transmembrane transporter activity//catalytic activity//molecular_function//ion channel activity//transferase activity, transferring acyl groups//channel act…	--	--	--	PREDICTED: cyclic nucleotide-gated ion channel 1-like isoform X1 [Solanum lycopersicum]
321	Novel02485	186.753	478.673	-1.3579	1.3998e-05	9.4321e-05	DOWN	--	--	GO:0044424//GO:0044464//GO:0005622//GO:0005623//GO:0005575//GO:0005737	intracellular part//cell part//intracellular//cell//cellular_component//cytoplasm	GO:0046872//GO:0004668//GO:0005488//GO:0043169//GO:0005515//GO:0046914//GO:0016813//GO:0043167//GO:0003674//GO:0005509//GO:0008270//GO:0016787//GO:0003824//GO:0016810	metal ion binding//protein-arginine deiminase activity//binding//cation binding//protein binding//transition metal ion binding//hydrolase activity, acting on carbon-nitrogen (but not peptide) bonds, in linear amidines//ion binding//molecular_function//calcium ion binding//zinc ion binding//hydrolase activity//catalytic activity//hydrolase activity, acting on carbon-nitrogen (but not peptide) bonds	no KO assigned | (RefSeq) uncharacterized LOC102601290	http://www.genome.jp/dbget-bin/www_bget?sot:102601290	--	PREDICTED: uncharacterized protein LOC102601290 isoform X1 [Solanum tuberosum]>gi|565378533|ref|XP_006355710.1| PREDICTED: uncharacterized protein LOC102601290 isoform X2 [Solanum tuberosum]>gi|565378535|ref|XP_006355711.1| PREDICTED: uncharacterized protein LOC102601290 isoform X3 [Solanum tuberosum]
322	Novel02487	5.45837	27.903	-2.3539	0.0080689	0.02464	DOWN	GO:0006950//GO:0050896//GO:0006952//GO:0008150//GO:0009607	response to stress//response to stimulus//defense response//biological_process//response to biotic stimulus	--	--	--	--	no KO assigned | (RefSeq) kirola-like	http://www.genome.jp/dbget-bin/www_bget?sot:102587737	--	PREDICTED: kirola-like [Solanum tuberosum]
323	Novel02488	18.561	85.372	-2.2015	3.4646e-05	0.0002126	DOWN	GO:0050896//GO:0044267//GO:0050794//GO:0019752//GO:0018130//GO:0010556//GO:0060255//GO:0034654//GO:0016070//GO:0034641//GO:0032870//GO:0010468//GO:0032774//GO:0065007//GO:0043436//GO:0044238//GO:0046483//GO:0006418//GO:0006412//GO:0090304//GO:0070887//GO:0007165//GO:0010467//GO:0043603//GO:0006807//GO:0009058//GO:0019538//GO:0044237//GO:0051716//GO:0006139//GO:1901360//GO:0044271//GO:0009719//GO:…	response to stimulus//cellular protein metabolic process//regulation of cellular process//carboxylic acid metabolic process//heterocycle biosynthetic process//regulation of macromolecule biosynthetic process//regulation of macromolecule metabolic process//nucleobase-containing compound biosynthetic process//RNA metabolic process//cellular nitrogen compound metabolic process//cellular response to …	--	--	GO:0000166//GO:0001883//GO:0001882//GO:0043168//GO:0005488//GO:0032559//GO:0032549//GO:0097367//GO:1901265//GO:0016875//GO:0017076//GO:0016874//GO:1901363//GO:0030554//GO:0003824//GO:0004812//GO:0097159//GO:0032553//GO:0005524//GO:0035639//GO:0032555//GO:0032550//GO:0043167//GO:0003674//GO:0036094	nucleotide binding//purine nucleoside binding//nucleoside binding//anion binding//binding//adenyl ribonucleotide binding//ribonucleoside binding//carbohydrate derivative binding//nucleoside phosphate binding//ligase activity, forming carbon-oxygen bonds//purine nucleotide binding//ligase activity//heterocyclic compound binding//adenyl nucleotide binding//catalytic activity//aminoacyl-tRNA ligase …	K01874 methionyl-tRNA synthetase [EC:6.1.1.10] | (RefSeq) methionine--tRNA ligase, cytoplasmic-like	http://www.genome.jp/dbget-bin/www_bget?sot:102583584	--	PREDICTED: probable methionine--tRNA ligase [Nelumbo nucifera]
324	Novel02515	25.1268	110.72	-2.1396	8.2764e-06	5.8951e-05	DOWN	--	--	--	--	--	--	--	--	--	--
325	Novel02519	8081.4	16813.9	-1.057	3.678e-06	2.8675e-05	DOWN	GO:0019219//GO:0009059//GO:0032501//GO:0019222//GO:0043170//GO:1901360//GO:0006139//GO:0044271//GO:0044237//GO:0006807//GO:0009058//GO:0010467//GO:0090304//GO:0046483//GO:0044238//GO:0007275//GO:0032774//GO:0010468//GO:0065007//GO:0016070//GO:0034641//GO:0060255//GO:0010556//GO:0034654//GO:0050794//GO:0018130//GO:0044260//GO:1901576//GO:2001141//GO:0006725//GO:0097659//GO:0071704//GO:0006351//GO:…	regulation of nucleobase-containing compound metabolic process//macromolecule biosynthetic process//multicellular organismal process//regulation of metabolic process//macromolecule metabolic process//organic cyclic compound metabolic process//nucleobase-containing compound metabolic process//cellular nitrogen compound biosynthetic process//cellular metabolic process//nitrogen compound metabolic p…	GO:0005576//GO:0005575	extracellular region//cellular_component	GO:0048037//GO:0046872//GO:0008131//GO:0005488//GO:0005515//GO:0046914//GO:0043169//GO:0005179//GO:0003674//GO:0005507//GO:0003700//GO:0043167//GO:0048038//GO:0016638//GO:0016491//GO:0003824//GO:0005102//GO:0016641	cofactor binding//metal ion binding//primary amine oxidase activity//binding//protein binding//transition metal ion binding//cation binding//hormone activity//molecular_function//copper ion binding//DNA-binding transcription factor activity//ion binding//quinone binding//oxidoreductase activity, acting on the CH-NH2 group of donors//oxidoreductase activity//catalytic activity//signaling receptor …	K00276 primary-amine oxidase [EC:1.4.3.21] | (RefSeq) copper methylamine oxidase-like	http://www.genome.jp/dbget-bin/www_bget?sot:102584319	--	PREDICTED: copper amine oxidase 1-like [Solanum tuberosum]
326	Novel02522	251.081	1487.44	-2.5666	2.0146e-22	2.1437e-20	DOWN	--	--	--	--	--	--	K18723 nucleoporin GLE1 | (RefSeq) protein GLE1	http://www.genome.jp/dbget-bin/www_bget?sot:102586428	--	PREDICTED: nucleoporin GLE1 isoform X2 [Solanum lycopersicum]
327	Novel02537	3055.73	6204.14	-1.0217	1.1262e-05	7.7846e-05	DOWN	GO:0033365//GO:0017038//GO:0006913//GO:0006810//GO:0006605//GO:0051234//GO:0008150//GO:0046907//GO:0051641//GO:0071702//GO:0051649//GO:0034504//GO:0034613//GO:0051170//GO:0033036//GO:0070727//GO:0006886//GO:0072594//GO:0045184//GO:0015031//GO:0051169//GO:0051179//GO:0016482//GO:0006891//GO:0006606//GO:0008104//GO:0016192//GO:0048193	protein localization to organelle//protein import//nucleocytoplasmic transport//transport//protein targeting//establishment of localization//biological_process//intracellular transport//cellular localization//organic substance transport//establishment of localization in cell//protein localization to nucleus//cellular protein localization//import into nucleus//macromolecule localization//cellular …	GO:0044431//GO:0017119//GO:0043226//GO:0005737//GO:0005794//GO:0032991//GO:0043227//GO:0043231//GO:0005575//GO:0044444//GO:0005623//GO:0044464//GO:0012505//GO:0005622//GO:0044424//GO:0043229//GO:0044446//GO:0044422	Golgi apparatus part//Golgi transport complex//organelle//cytoplasm//Golgi apparatus//protein-containing complex//membrane-bounded organelle//intracellular membrane-bounded organelle//cellular_component//cytoplasmic part//cell//cell part//endomembrane system//intracellular//intracellular part//intracellular organelle//intracellular organelle part//organelle part	--	--	K12879 THO complex subunit 2 | (RefSeq) THO complex subunit 2	http://www.genome.jp/dbget-bin/www_bget?sot:102606042	--	PREDICTED: THO complex subunit 2-like [Solanum tuberosum]
328	Novel02539	2331.1	5196.62	-1.1566	5.9169e-07	5.5801e-06	DOWN	GO:0044237//GO:0006464//GO:0016310//GO:0043170//GO:0044267//GO:0019538//GO:0006468//GO:0044238//GO:0036211//GO:0006793//GO:0008152//GO:0044260//GO:0071704//GO:0008150//GO:0043412//GO:0006796//GO:0009987	cellular metabolic process//cellular protein modification process//phosphorylation//macromolecule metabolic process//cellular protein metabolic process//protein metabolic process//protein phosphorylation//primary metabolic process//protein modification process//phosphorus metabolic process//metabolic process//cellular macromolecule metabolic process//organic substance metabolic process//biologica…	--	--	GO:0032549//GO:0032559//GO:0005488//GO:0043168//GO:0017076//GO:1901265//GO:0097367//GO:0001882//GO:0016772//GO:0004672//GO:0001883//GO:0000166//GO:0016773//GO:0032550//GO:0035639//GO:0032555//GO:0032553//GO:0005524//GO:0016301//GO:0003674//GO:0036094//GO:0043167//GO:0016740//GO:0003824//GO:0030554//GO:1901363//GO:0097159	ribonucleoside binding//adenyl ribonucleotide binding//binding//anion binding//purine nucleotide binding//nucleoside phosphate binding//carbohydrate derivative binding//nucleoside binding//transferase activity, transferring phosphorus-containing groups//protein kinase activity//purine nucleoside binding//nucleotide binding//phosphotransferase activity, alcohol group as acceptor//purine ribonucleo…	no KO assigned | (RefSeq) protein phosphatase 2C and cyclic nucleotide-binding/kinase domain-containing protein	http://www.genome.jp/dbget-bin/www_bget?sot:102591383	--	PREDICTED: protein phosphatase 2C and cyclic nucleotide-binding/kinase domain-containing protein-like [Solanum tuberosum]
329	Novel02557	9.6487	44.9348	-2.2194	0.0020321	0.007561	DOWN	GO:0090304//GO:0046483//GO:0044238//GO:0006807//GO:0006259//GO:0034641//GO:0043170//GO:0044237//GO:0006139//GO:1901360//GO:0009987//GO:0008150//GO:0006725//GO:0071704//GO:0015074//GO:0044260//GO:0008152	nucleic acid metabolic process//heterocycle metabolic process//primary metabolic process//nitrogen compound metabolic process//DNA metabolic process//cellular nitrogen compound metabolic process//macromolecule metabolic process//cellular metabolic process//nucleobase-containing compound metabolic process//organic cyclic compound metabolic process//cellular process//biological_process//cellular ar…	--	--	GO:0043169//GO:0046914//GO:0046872//GO:0005488//GO:0097159//GO:0003676//GO:1901363//GO:0043167//GO:0003674//GO:0008270	cation binding//transition metal ion binding//metal ion binding//binding//organic cyclic compound binding//nucleic acid binding//heterocyclic compound binding//ion binding//molecular_function//zinc ion binding	no KO assigned | (RefSeq) putative late blight resistance protein homolog R1A-3	http://www.genome.jp/dbget-bin/www_bget?sot:102592255	--	hypothetical protein VITISV_033373 [Vitis vinifera]
330	Novel02561	1424.62	2859.3	-1.0051	1.9404e-05	0.00012655	DOWN	GO:0008654//GO:0044237//GO:0044255//GO:0006644//GO:0006629//GO:0090407//GO:0044238//GO:0009058//GO:0008152//GO:0006793//GO:0071704//GO:1901576//GO:0008150//GO:0044249//GO:0009987//GO:0019637//GO:0008610//GO:0006796	phospholipid biosynthetic process//cellular metabolic process//cellular lipid metabolic process//phospholipid metabolic process//lipid metabolic process//organophosphate biosynthetic process//primary metabolic process//biosynthetic process//metabolic process//phosphorus metabolic process//organic substance metabolic process//organic substance biosynthetic process//biological_process//cellular bio…	GO:0016020//GO:0005575	membrane//cellular_component	GO:0016772//GO:0016780//GO:0003674//GO:0003824//GO:0016740	transferase activity, transferring phosphorus-containing groups//phosphotransferase activity, for other substituted phosphate groups//molecular_function//catalytic activity//transferase activity	no KO assigned | (RefSeq) uncharacterized LOC102602959	http://www.genome.jp/dbget-bin/www_bget?sot:102602959	--	PREDICTED: putative GPI-anchored protein PB15E9.01c-like isoform X1 [Solanum tuberosum]
331	Novel02573	684.38	1456.86	-1.09	1.0126e-05	7.067e-05	DOWN	--	--	--	--	GO:0005524//GO:0032553//GO:0032550//GO:0016787//GO:0032555//GO:0035639//GO:0043167//GO:0036094//GO:0003674//GO:0030554//GO:0003824//GO:1901363//GO:0003676//GO:0097159//GO:0043168//GO:0032559//GO:0032549//GO:0005488//GO:1901265//GO:0097367//GO:0017076//GO:0001883//GO:0003677//GO:0000166//GO:0001882	ATP binding//ribonucleotide binding//purine ribonucleoside binding//hydrolase activity//purine ribonucleotide binding//purine ribonucleoside triphosphate binding//ion binding//small molecule binding//molecular_function//adenyl nucleotide binding//catalytic activity//heterocyclic compound binding//nucleic acid binding//organic cyclic compound binding//anion binding//adenyl ribonucleotide binding//…	K12614 ATP-dependent RNA helicase DDX6/DHH1 [EC:3.6.4.13] | (RefSeq) DEAD-box ATP-dependent RNA helicase 8	http://www.genome.jp/dbget-bin/www_bget?sot:102587039	--	PREDICTED: DEAD-box ATP-dependent RNA helicase 8-like [Solanum tuberosum]
332	Novel02586	1802.21	8692.91	-2.2701	0.00058231	0.0025604	DOWN	GO:0034641//GO:0006259//GO:0050896//GO:0006807//GO:0006310//GO:0044238//GO:0046483//GO:0090304//GO:0006139//GO:1901360//GO:0051716//GO:0044237//GO:0006950//GO:0006974//GO:0043170//GO:0008150//GO:0033554//GO:0009987//GO:0006281//GO:0008152//GO:0044260//GO:0071704//GO:0006725	cellular nitrogen compound metabolic process//DNA metabolic process//response to stimulus//nitrogen compound metabolic process//DNA recombination//primary metabolic process//heterocycle metabolic process//nucleic acid metabolic process//nucleobase-containing compound metabolic process//organic cyclic compound metabolic process//cellular response to stimulus//cellular metabolic process//response t…	GO:0005575//GO:0016020	cellular_component//membrane	GO:0001882//GO:0016772//GO:0016887//GO:0000166//GO:0005525//GO:0042578//GO:0001883//GO:0017111//GO:0032561//GO:0003678//GO:0005488//GO:0016817//GO:0032549//GO:0032559//GO:0003924//GO:0043168//GO:0017076//GO:0097367//GO:1901265//GO:0009378//GO:0016788//GO:0019001//GO:0016740//GO:1901363//GO:0003824//GO:0030554//GO:0098519//GO:0016462//GO:0004386//GO:0097159//GO:0035639//GO:0032555//GO:0016787//GO:…	nucleoside binding//transferase activity, transferring phosphorus-containing groups//ATPase activity//nucleotide binding//GTP binding//phosphoric ester hydrolase activity//purine nucleoside binding//nucleoside-triphosphatase activity//guanyl ribonucleotide binding//DNA helicase activity//binding//hydrolase activity, acting on acid anhydrides//ribonucleoside binding//adenyl ribonucleotide binding/…	no KO assigned | (RefSeq) pleiotropic drug resistance protein 1	http://www.genome.jp/dbget-bin/www_bget?sot:102584018	--	PREDICTED: pleiotropic drug resistance protein 1-like [Solanum lycopersicum]
333	Novel02616	3054.36	6505.05	-1.0907	1.869e-06	1.5586e-05	DOWN	GO:0009987//GO:0008150//GO:0008152//GO:0015979//GO:0044237	cellular process//biological_process//metabolic process//photosynthesis//cellular metabolic process	--	--	GO:0097159//GO:0003676//GO:1901363//GO:0003674//GO:0003677//GO:0005488	organic cyclic compound binding//nucleic acid binding//heterocyclic compound binding//molecular_function//DNA binding//binding	no KO assigned | (RefSeq) uncharacterized LOC102604173	http://www.genome.jp/dbget-bin/www_bget?sot:102604173	--	PREDICTED: caldesmon-like isoform X1 [Solanum tuberosum]
334	Novel02625	1392.44	2875.77	-1.0463	1.016e-05	7.0881e-05	DOWN	GO:0009966//GO:0033036//GO:0048583//GO:0051649//GO:0034613//GO:0071702//GO:0051641//GO:0032502//GO:0046907//GO:0009987//GO:0008150//GO:0006810//GO:0051234//GO:0050789//GO:0023052//GO:0048193//GO:0032501//GO:0016192//GO:0007154//GO:0023051//GO:0008104//GO:0010646//GO:0051716//GO:0016482//GO:0051179//GO:0015031//GO:0007165//GO:0006886//GO:0007275//GO:0045184//GO:0065007//GO:0006888//GO:0070727//GO:…	regulation of signal transduction//macromolecule localization//regulation of response to stimulus//establishment of localization in cell//cellular protein localization//organic substance transport//cellular localization//developmental process//intracellular transport//cellular process//biological_process//transport//establishment of localization//regulation of biological process//signaling//Golgi…	GO:0098805//GO:0043231//GO:0005575//GO:0030127//GO:0030135//GO:0030662//GO:0043227//GO:0016020//GO:0032991//GO:0098588//GO:0005737//GO:0030133//GO:0030134//GO:0043226//GO:0098796//GO:0030117//GO:0012507//GO:0030120//GO:0043229//GO:0044446//GO:0044422//GO:0031090//GO:0044433//GO:0031410//GO:0044425//GO:0012506//GO:0044424//GO:0005622//GO:0030659//GO:0012505//GO:0044464//GO:0030658//GO:0048475//GO:…	whole membrane//intracellular membrane-bounded organelle//cellular_component//COPII vesicle coat//coated vesicle//coated vesicle membrane//membrane-bounded organelle//membrane//protein-containing complex//bounding membrane of organelle//cytoplasm//transport vesicle//COPII-coated ER to Golgi transport vesicle//organelle//membrane protein complex//membrane coat//ER to Golgi transport vesicle membra…	GO:0003674//GO:0043167//GO:0008270//GO:0097159//GO:1901363//GO:0003676//GO:0046872//GO:0005488//GO:0046914//GO:0005515//GO:0043169//GO:0003677	molecular_function//ion binding//zinc ion binding//organic cyclic compound binding//heterocyclic compound binding//nucleic acid binding//metal ion binding//binding//transition metal ion binding//protein binding//cation binding//DNA binding	no KO assigned | (RefSeq) E3 SUMO-protein ligase SIZ1-like	http://www.genome.jp/dbget-bin/www_bget?sot:102599774	--	PREDICTED: E3 SUMO-protein ligase SIZ1-like [Solanum tuberosum]
335	Novel02643	588.645	1262.65	-1.101	9.9846e-06	6.9828e-05	DOWN	GO:0019538//GO:0044238//GO:0006468//GO:0036211//GO:0044267//GO:0006464//GO:0016310//GO:0043170//GO:0044237//GO:0006796//GO:0009987//GO:0008150//GO:0043412//GO:0044260//GO:0071704//GO:0006793//GO:0008152	protein metabolic process//primary metabolic process//protein phosphorylation//protein modification process//cellular protein metabolic process//cellular protein modification process//phosphorylation//macromolecule metabolic process//cellular metabolic process//phosphate-containing compound metabolic process//cellular process//biological_process//macromolecule modification//cellular macromolecule…	--	--	GO:0016773//GO:0001882//GO:0016772//GO:0004672//GO:0001883//GO:0000166//GO:0017076//GO:1901265//GO:0097367//GO:0032559//GO:0032549//GO:0005488//GO:0043168//GO:0097159//GO:0016740//GO:0030554//GO:0003824//GO:1901363//GO:0003674//GO:0036094//GO:0043167//GO:0032550//GO:0035639//GO:0032555//GO:0032553//GO:0005524//GO:0016301	phosphotransferase activity, alcohol group as acceptor//nucleoside binding//transferase activity, transferring phosphorus-containing groups//protein kinase activity//purine nucleoside binding//nucleotide binding//purine nucleotide binding//nucleoside phosphate binding//carbohydrate derivative binding//adenyl ribonucleotide binding//ribonucleoside binding//binding//anion binding//organic cyclic co…	K08869 aarF domain-containing kinase | (RefSeq) putative ABC1 protein At2g40090	http://www.genome.jp/dbget-bin/www_bget?sot:102588073	--	PREDICTED: putative ABC1 protein At2g40090-like [Solanum tuberosum]
336	Novel02645	33.1661	127.461	-1.9423	1.117e-05	7.73e-05	DOWN	--	--	--	--	--	--	no KO assigned | (RefSeq) uncharacterized LOC102598776	http://www.genome.jp/dbget-bin/www_bget?sot:102598776	--	PREDICTED: uncharacterized protein LOC102598776 [Solanum tuberosum]
337	Novel02648	34.8186	103.169	-1.5671	0.0045556	0.015083	DOWN	--	--	--	--	--	--	--	--	--	--
338	Novel02650	2.56728	35.3081	-3.7817	0.016499	0.0453	DOWN	GO:0009987//GO:0008150//GO:0050789//GO:0023052//GO:0007165//GO:0065007//GO:0050794//GO:0050896//GO:0007154//GO:0051716	cellular process//biological_process//regulation of biological process//signaling//signal transduction//biological regulation//regulation of cellular process//response to stimulus//cell communication//cellular response to stimulus	--	--	--	--	--	--	--	hypothetical protein VITISV_043861 [Vitis vinifera]
339	Novel02653	413.892	1872.26	-2.1775	0.0012674	0.0050317	DOWN	GO:0006811//GO:0055085//GO:0006820//GO:0051179//GO:0015698//GO:0015689//GO:0008150//GO:0051234//GO:0006810//GO:0009987	ion transport//transmembrane transport//anion transport//localization//inorganic anion transport//molybdate ion transport//biological_process//establishment of localization//transport//cellular process	GO:0016020//GO:0005575	membrane//cellular_component	GO:0015075//GO:0008509//GO:0005215//GO:0015098//GO:0003674//GO:0015103//GO:0022857	ion transmembrane transporter activity//anion transmembrane transporter activity//transporter activity//molybdate ion transmembrane transporter activity//molecular_function//inorganic anion transmembrane transporter activity//transmembrane transporter activity	K06901 putative MFS transporter, AGZA family, xanthine/uracil permease | (RefSeq) adenine/guanine permease AZG1	http://www.genome.jp/dbget-bin/www_bget?sot:102605023	--	PREDICTED: adenine/guanine permease AZG1-like isoform X1 [Solanum tuberosum]>gi|565391209|ref|XP_006361316.1| PREDICTED: adenine/guanine permease AZG1-like isoform X2 [Solanum tuberosum]
340	Novel02658	173.012	542.921	-1.6499	8.7602e-09	1.2227e-07	DOWN	--	--	--	--	--	--	K15437 aminoacyl tRNA synthase complex-interacting multifunctional protein 1 | (RefSeq) aminoacyl tRNA synthase complex-interacting multifunctional protein 1	http://www.genome.jp/dbget-bin/www_bget?sot:102591263	--	PREDICTED: methionine--tRNA ligase, cytoplasmic-like [Solanum tuberosum]
341	Novel02659	1061.69	2215.91	-1.0615	8.7236e-06	6.187e-05	DOWN	--	--	--	--	--	--	no KO assigned | (RefSeq) uncharacterized LOC102585852	http://www.genome.jp/dbget-bin/www_bget?sot:102585852	--	PREDICTED: uncharacterized protein LOC102585852 isoform X1 [Solanum tuberosum]>gi|565381923|ref|XP_006357307.1| PREDICTED: uncharacterized protein LOC102585852 isoform X2 [Solanum tuberosum]
342	Novel02672	2001.43	4334.25	-1.1147	1.8414e-06	1.5386e-05	DOWN	--	--	GO:0044425//GO:0016021//GO:0031224//GO:0005575//GO:0016020	membrane part//integral component of membrane//intrinsic component of membrane//cellular_component//membrane	GO:0005488//GO:0003723//GO:0003674//GO:1901363//GO:0003676//GO:0097159	binding//RNA binding//molecular_function//heterocyclic compound binding//nucleic acid binding//organic cyclic compound binding	no KO assigned | (RefSeq) flowering time control protein FPA	http://www.genome.jp/dbget-bin/www_bget?sot:102604195	--	PREDICTED: flowering time control protein FPA-like isoform X1 [Solanum tuberosum]>gi|565368153|ref|XP_006350717.1| PREDICTED: flowering time control protein FPA-like isoform X2 [Solanum tuberosum]
343	Novel02680	142.477	451.45	-1.6638	2.8218e-07	2.8456e-06	DOWN	--	--	--	--	--	--	--	--	--	--
344	Novel02696	12.6575	47.0996	-1.8957	0.0047582	0.015666	DOWN	--	--	--	--	--	--	no KO assigned | (RefSeq) glutamyl-tRNA(Gln) amidotransferase subunit A-like	http://www.genome.jp/dbget-bin/www_bget?sot:102586146	--	PREDICTED: glutamyl-tRNA(Gln) amidotransferase subunit A, mitochondrial-like isoform X1 [Solanum lycopersicum]
345	Novel02700	1295.48	2897.89	-1.1615	1.2446e-06	1.0912e-05	DOWN	--	--	--	--	--	--	no KO assigned | (RefSeq) uncharacterized LOC102606113	http://www.genome.jp/dbget-bin/www_bget?sot:102606113	--	PREDICTED: uncharacterized protein LOC102606113 isoform X1 [Solanum tuberosum]>gi|565376530|ref|XP_006354756.1| PREDICTED: uncharacterized protein LOC102606113 isoform X2 [Solanum tuberosum]
346	Novel02705	2225.21	6572.3	-1.5625	9.7525e-05	0.00053154	DOWN	GO:0009987//GO:0046907//GO:0008150//GO:0051234//GO:0006810//GO:0006725//GO:0071704//GO:0034613//GO:0051649//GO:0015074//GO:0044260//GO:0033036//GO:0008152//GO:0071702//GO:0051641//GO:0090304//GO:0015031//GO:0046483//GO:0044238//GO:0045184//GO:0006886//GO:0006807//GO:0051179//GO:0070727//GO:0006259//GO:0034641//GO:0043170//GO:0044237//GO:0008104//GO:0006139//GO:1901360	cellular process//intracellular transport//biological_process//establishment of localization//transport//cellular aromatic compound metabolic process//organic substance metabolic process//cellular protein localization//establishment of localization in cell//DNA integration//cellular macromolecule metabolic process//macromolecule localization//metabolic process//organic substance transport//cellul…	--	--	GO:0008536//GO:0097159//GO:0003676//GO:1901363//GO:0051020//GO:0003674//GO:0005515//GO:0017016//GO:0003677//GO:0031267//GO:0019899//GO:0005488	Ran GTPase binding//organic cyclic compound binding//nucleic acid binding//heterocyclic compound binding//GTPase binding//molecular_function//protein binding//Ras GTPase binding//DNA binding//small GTPase binding//enzyme binding//binding	K15436 transportin-3 | (RefSeq) transportin-3	http://www.genome.jp/dbget-bin/www_bget?sot:102594686	--	PREDICTED: transportin-3-like [Solanum tuberosum]
347	Novel02715	179.262	368.428	-1.0393	0.00049522	0.0022316	DOWN	--	--	--	--	--	--	no KO assigned | (RefSeq) uncharacterized LOC102585548	http://www.genome.jp/dbget-bin/www_bget?sot:102585548	--	PREDICTED: uncharacterized protein LOC102585548 [Solanum tuberosum]
348	Novel02724	17.1686	132.848	-2.9519	4.3786e-07	4.2425e-06	DOWN	GO:0018130//GO:0006824//GO:0034641//GO:0046483//GO:0051179//GO:0006807//GO:0009110//GO:0009058//GO:0006767//GO:0044237//GO:0042364//GO:0006811//GO:1901360//GO:0009235//GO:0044271//GO:0006812//GO:0033014//GO:0072511//GO:0030001//GO:0044283//GO:0019438//GO:0044249//GO:1901566//GO:0051234//GO:0006810//GO:1901564//GO:0008150//GO:0009987//GO:1901362//GO:0044281//GO:0006766//GO:0000041//GO:0009236//GO:…	heterocycle biosynthetic process//cobalt ion transport//cellular nitrogen compound metabolic process//heterocycle metabolic process//localization//nitrogen compound metabolic process//vitamin biosynthetic process//biosynthetic process//water-soluble vitamin metabolic process//cellular metabolic process//water-soluble vitamin biosynthetic process//ion transport//organic cyclic compound metabolic p…	GO:0016020//GO:0005575	membrane//cellular_component	GO:0008324//GO:0008757//GO:0015075//GO:0022890//GO:0015087//GO:0005215//GO:0046873//GO:0016278//GO:0042054//GO:0008276//GO:0003824//GO:0018024//GO:0022857//GO:0046915//GO:0016740//GO:0016741//GO:0008170//GO:0008168//GO:0003674//GO:0016279	cation transmembrane transporter activity//S-adenosylmethionine-dependent methyltransferase activity//ion transmembrane transporter activity//inorganic cation transmembrane transporter activity//cobalt ion transmembrane transporter activity//transporter activity//metal ion transmembrane transporter activity//lysine N-methyltransferase activity//histone methyltransferase activity//protein methyltr…	no KO assigned | (RefSeq) histone-lysine N-methyltransferase SUVR2	http://www.genome.jp/dbget-bin/www_bget?sot:102580002	--	PREDICTED: uncharacterized protein LOC101264639 isoform X3 [Solanum lycopersicum]
349	Novel02730	6.22577	79.977	-3.6833	1.1338e-08	1.5462e-07	DOWN	--	--	--	--	--	--	--	--	--	PREDICTED: putative late blight resistance protein homolog R1B-14-like [Solanum tuberosum]
350	Novel02749	229.335	581.615	-1.3426	0.00022359	0.0011137	DOWN	GO:1901657//GO:0015672//GO:0006164//GO:0044249//GO:1901566//GO:0051234//GO:0009199//GO:0098662//GO:0006810//GO:1901564//GO:0008150//GO:0006163//GO:0009126//GO:0042455//GO:0046128//GO:0019438//GO:0015986//GO:0009201//GO:0009163//GO:0009142//GO:0006796//GO:0009260//GO:0019637//GO:0009987//GO:0042451//GO:0006754//GO:0009152//GO:0098655//GO:1901362//GO:0044281//GO:0046129//GO:0009141//GO:0006793//GO:…	glycosyl compound metabolic process//monovalent inorganic cation transport//purine nucleotide biosynthetic process//cellular biosynthetic process//organonitrogen compound biosynthetic process//establishment of localization//ribonucleoside triphosphate metabolic process//inorganic cation transmembrane transport//transport//organonitrogen compound metabolic process//biological_process//purine nucle…	GO:0098796//GO:0005743//GO:0098798//GO:0033177//GO:0098800//GO:0043226//GO:0031975//GO:0005740//GO:0005737//GO:0005575//GO:0043231//GO:0016469//GO:0005739//GO:0032991//GO:0044429//GO:0016020//GO:0043227//GO:0031967//GO:0045263//GO:0044444//GO:0005623//GO:0019866//GO:0005622//GO:0044464//GO:0044455//GO:0000276//GO:0031966//GO:0045259//GO:0044424//GO:0044425//GO:0044422//GO:0043229//GO:0044446//GO:…	membrane protein complex//mitochondrial inner membrane//mitochondrial protein complex//proton-transporting two-sector ATPase complex, proton-transporting domain//inner mitochondrial membrane protein complex//organelle//envelope//mitochondrial envelope//cytoplasm//cellular_component//intracellular membrane-bounded organelle//proton-transporting two-sector ATPase complex//mitochondrion//protein-con…	GO:0022857//GO:0008270//GO:0015077//GO:0003674//GO:0043167//GO:0022890//GO:0008324//GO:0015075//GO:0005215//GO:0046914//GO:0043169//GO:0005488//GO:0046872//GO:0015078	transmembrane transporter activity//zinc ion binding//monovalent inorganic cation transmembrane transporter activity//molecular_function//ion binding//inorganic cation transmembrane transporter activity//cation transmembrane transporter activity//ion transmembrane transporter activity//transporter activity//transition metal ion binding//cation binding//binding//metal ion binding//proton transmemb…	no KO assigned | (RefSeq) uncharacterized LOC102581842	http://www.genome.jp/dbget-bin/www_bget?sot:102581842	--	PREDICTED: uncharacterized protein LOC102581842 [Solanum tuberosum]
351	Novel02751	442.646	1129.62	-1.3516	1.2527e-07	1.3588e-06	DOWN	--	--	--	--	--	--	--	--	--	--
352	Novel02757	18.5022	172.936	-3.2245	4.4933e-13	1.3824e-11	DOWN	GO:0008150//GO:0051234//GO:0006810//GO:0051179	biological_process//establishment of localization//transport//localization	GO:0016020//GO:0005575	membrane//cellular_component	GO:0003674//GO:0005215	molecular_function//transporter activity	--	--	--	PREDICTED: uncharacterized protein LOC104249929 [Nicotiana sylvestris]
353	Novel02759	127.691	471.822	-1.8856	5.5484e-06	4.1201e-05	DOWN	GO:0006807//GO:0044238//GO:0046483//GO:0090304//GO:0034641//GO:0006259//GO:0043170//GO:0006139//GO:1901360//GO:0044237//GO:0009399//GO:0055114//GO:0009987//GO:0071941//GO:0008150//GO:0044260//GO:0015074//GO:0071704//GO:0006725//GO:0008152	nitrogen compound metabolic process//primary metabolic process//heterocycle metabolic process//nucleic acid metabolic process//cellular nitrogen compound metabolic process//DNA metabolic process//macromolecule metabolic process//nucleobase-containing compound metabolic process//organic cyclic compound metabolic process//cellular metabolic process//nitrogen fixation//oxidation-reduction process//c…	GO:0005576//GO:0005575	extracellular region//cellular_component	GO:0016491//GO:0003824//GO:0016732//GO:0003674//GO:0016163//GO:0016730	oxidoreductase activity//catalytic activity//oxidoreductase activity, acting on iron-sulfur proteins as donors, dinitrogen as acceptor//molecular_function//nitrogenase activity//oxidoreductase activity, acting on iron-sulfur proteins as donors	no KO assigned | (RefSeq) F-box/LRR-repeat protein At5g02910-like	http://www.genome.jp/dbget-bin/www_bget?sot:102582912	--	hypothetical protein VITISV_002159 [Vitis vinifera]
354	Novel02782	30.1614	94.1599	-1.6424	0.00057005	0.0025188	DOWN	GO:1901576//GO:0071704//GO:0042440//GO:0008152//GO:0046148//GO:0055114//GO:0008610//GO:0006720//GO:0009987//GO:0044249//GO:0008150//GO:0016114//GO:0006721//GO:0016117//GO:0016116//GO:0044255//GO:0044237//GO:0016108//GO:0009058//GO:0044238//GO:0008299//GO:0016109//GO:0006629	organic substance biosynthetic process//organic substance metabolic process//pigment metabolic process//metabolic process//pigment biosynthetic process//oxidation-reduction process//lipid biosynthetic process//isoprenoid metabolic process//cellular process//cellular biosynthetic process//biological_process//terpenoid biosynthetic process//terpenoid metabolic process//carotenoid biosynthetic proce…	--	--	GO:0003674//GO:0036094//GO:0043167//GO:0050660//GO:0050662//GO:0097159//GO:0016491//GO:1901363//GO:0003824//GO:0048037//GO:0016614//GO:1901265//GO:0005488//GO:0043168//GO:0016705//GO:0000166	molecular_function//small molecule binding//ion binding//flavin adenine dinucleotide binding//coenzyme binding//organic cyclic compound binding//oxidoreductase activity//heterocyclic compound binding//catalytic activity//cofactor binding//oxidoreductase activity, acting on CH-OH group of donors//nucleoside phosphate binding//binding//anion binding//oxidoreductase activity, acting on paired donors…	no KO assigned | (RefSeq) protein HOTHEAD-like	http://www.genome.jp/dbget-bin/www_bget?sot:102603229	--	PREDICTED: protein HOTHEAD-like [Solanum tuberosum]
355	Novel02792	953.558	2492.54	-1.3862	1.0717e-08	1.4682e-07	DOWN	--	--	GO:0005575//GO:0016020//GO:0031224//GO:0044425//GO:0016021	cellular_component//membrane//intrinsic component of membrane//membrane part//integral component of membrane	GO:0008270//GO:0003674//GO:0043167//GO:0005515//GO:0046914//GO:0043169//GO:0005488//GO:0046872	zinc ion binding//molecular_function//ion binding//protein binding//transition metal ion binding//cation binding//binding//metal ion binding	no KO assigned | (RefSeq) histone-lysine N-methyltransferase ASHH2-like	http://www.genome.jp/dbget-bin/www_bget?sot:102595858	--	PREDICTED: histone-lysine N-methyltransferase ASHH2-like [Solanum tuberosum]
356	Novel02802	708.23	1682.24	-1.2481	3.7544e-07	3.6981e-06	DOWN	GO:0051252//GO:0008152//GO:1903506//GO:0034645//GO:0006351//GO:0071704//GO:0097659//GO:0006725//GO:2001141//GO:1901576//GO:0044260//GO:0019438//GO:0009889//GO:0044249//GO:0031323//GO:0050789//GO:0006355//GO:0031326//GO:0008150//GO:2000112//GO:0009987//GO:0051171//GO:0080090//GO:1901362//GO:0044237//GO:0006139//GO:1901360//GO:0044271//GO:0043170//GO:0019222//GO:0019219//GO:0009059//GO:0018130//GO:…	regulation of RNA metabolic process//metabolic process//regulation of nucleic acid-templated transcription//cellular macromolecule biosynthetic process//transcription, DNA-templated//organic substance metabolic process//nucleic acid-templated transcription//cellular aromatic compound metabolic process//regulation of RNA biosynthetic process//organic substance biosynthetic process//cellular macrom…	GO:0043227//GO:0005575//GO:0043231//GO:0043226//GO:0044424//GO:0043229//GO:0005623//GO:0044464//GO:0005622//GO:0005634	membrane-bounded organelle//cellular_component//intracellular membrane-bounded organelle//organelle//intracellular part//intracellular organelle//cell//cell part//intracellular//nucleus	GO:0003674//GO:0005488//GO:0005515	molecular_function//binding//protein binding	K03130 transcription initiation factor TFIID subunit 5 | (RefSeq) transcription initiation factor TFIID subunit 5	http://www.genome.jp/dbget-bin/www_bget?sot:102605539	--	PREDICTED: transcription initiation factor TFIID subunit 5-like [Solanum tuberosum]
357	Novel02818	2601.93	5723.77	-1.1374	1.0555e-06	9.4387e-06	DOWN	--	--	--	--	--	--	K20286 TATA element modulatory factor | (RefSeq) golgin candidate 5	http://www.genome.jp/dbget-bin/www_bget?sot:102605784	--	PREDICTED: golgin candidate 5-like isoform X2 [Solanum tuberosum]
358	Novel02820	256.225	540.086	-1.0758	0.00011886	0.00063446	DOWN	--	--	--	--	GO:0043167//GO:0003674//GO:0008270//GO:0043169//GO:0046914//GO:0046872//GO:0005488	ion binding//molecular_function//zinc ion binding//cation binding//transition metal ion binding//metal ion binding//binding	no KO assigned | (RefSeq) protein FAR1-RELATED SEQUENCE 6	http://www.genome.jp/dbget-bin/www_bget?sot:102599522	--	PREDICTED: protein FAR1-RELATED SEQUENCE 6-like [Nicotiana tomentosiformis]
359	Novel02858	14.9631	55.0454	-1.8792	0.0028481	0.010097	DOWN	--	--	--	--	--	--	--	--	--	--
360	Novel02881	1384.12	7687.17	-2.4735	0.0019042	0.0071605	DOWN	GO:0044255//GO:0006644//GO:0044237//GO:0044238//GO:0046488//GO:0046486//GO:0006629//GO:0071704//GO:0006650//GO:0008152//GO:0006793//GO:0009987//GO:0006796//GO:0019637//GO:0008150	cellular lipid metabolic process//phospholipid metabolic process//cellular metabolic process//primary metabolic process//phosphatidylinositol metabolic process//glycerolipid metabolic process//lipid metabolic process//organic substance metabolic process//glycerophospholipid metabolic process//metabolic process//phosphorus metabolic process//cellular process//phosphate-containing compound metaboli…	--	--	GO:0097367//GO:0046872//GO:1901265//GO:0016307//GO:0017076//GO:0043168//GO:0005488//GO:0032549//GO:0032559//GO:0043169//GO:0016773//GO:0000166//GO:0001883//GO:0016772//GO:0001882//GO:0043167//GO:0036094//GO:0003674//GO:0016301//GO:0005524//GO:0032553//GO:0032555//GO:0035639//GO:0032550//GO:0097159//GO:1901363//GO:0003824//GO:0030554//GO:0016740	carbohydrate derivative binding//metal ion binding//nucleoside phosphate binding//phosphatidylinositol phosphate kinase activity//purine nucleotide binding//anion binding//binding//ribonucleoside binding//adenyl ribonucleotide binding//cation binding//phosphotransferase activity, alcohol group as acceptor//nucleotide binding//purine nucleoside binding//transferase activity, transferring phosphoru…	K00921 1-phosphatidylinositol-3-phosphate 5-kinase [EC:2.7.1.150] | (RefSeq) 1-phosphatidylinositol-3-phosphate 5-kinase FAB1B-like	http://www.genome.jp/dbget-bin/www_bget?sot:102588439	--	PREDICTED: 1-phosphatidylinositol-3-phosphate 5-kinase FAB1B-like isoform X5 [Solanum tuberosum]
361	Novel02882	2895.62	7554.98	-1.3836	0.00058009	0.0025529	DOWN	GO:0019438//GO:0050789//GO:0044249//GO:0031323//GO:0009889//GO:2000112//GO:0008150//GO:0031326//GO:0006355//GO:0009987//GO:0051171//GO:1901362//GO:0080090//GO:0008152//GO:0051252//GO:1903506//GO:0097659//GO:0071704//GO:0034645//GO:0006351//GO:0006725//GO:0044260//GO:1901576//GO:2001141//GO:0050794//GO:0018130//GO:0060255//GO:0010556//GO:0034654//GO:0016070//GO:0034641//GO:0032774//GO:0010468//GO:…	aromatic compound biosynthetic process//regulation of biological process//cellular biosynthetic process//regulation of cellular metabolic process//regulation of biosynthetic process//regulation of cellular macromolecule biosynthetic process//biological_process//regulation of cellular biosynthetic process//regulation of transcription, DNA-templated//cellular process//regulation of nitrogen compoun…	--	--	GO:0003674//GO:0005515//GO:0005488	molecular_function//protein binding//binding	K12115 clock-associated PAS protein ZTL | (RefSeq) adagio protein 1-like	http://www.genome.jp/dbget-bin/www_bget?sot:102583269	--	PREDICTED: adagio protein 1-like [Solanum tuberosum]
362	Novel02885	4.87121	36.7103	-2.9138	0.00054889	0.0024343	DOWN	--	--	--	--	--	--	no KO assigned | (RefSeq) uncharacterized LOC102578984	http://www.genome.jp/dbget-bin/www_bget?sot:102578984	--	PREDICTED: uncharacterized protein LOC102578984 [Solanum tuberosum]
363	Novel02888	129.907	923.496	-2.8296	2.7224e-08	3.4364e-07	DOWN	--	--	--	--	GO:0003674//GO:0005515//GO:0005488	molecular_function//protein binding//binding	no KO assigned | (RefSeq) VIN3-like protein 2	http://www.genome.jp/dbget-bin/www_bget?sot:102598718	--	PREDICTED: VIN3-like protein 2-like [Solanum tuberosum]
364	Novel02893	7.61814	65.1338	-3.0959	2.2489e-05	0.00014436	DOWN	--	--	--	--	--	--	--	--	--	--
365	Novel02910	2634.91	5974.83	-1.1811	3.8026e-07	3.7406e-06	DOWN	--	--	--	--	--	--	no KO assigned | (RefSeq) uncharacterized LOC102591301	http://www.genome.jp/dbget-bin/www_bget?sot:102591301	--	PREDICTED: uncharacterized protein LOC102591301 isoform X1 [Solanum tuberosum]
366	Novel02918	183.843	1034.49	-2.4924	7.4723e-16	3.5608e-14	DOWN	--	--	--	--	--	--	no KO assigned | (RefSeq) chloroplast envelope membrane protein	http://www.genome.jp/dbget-bin/www_bget?sot:102580425	--	PREDICTED: chloroplast envelope membrane protein-like [Solanum tuberosum]
367	Novel02921	113.506	308.787	-1.4438	6.0879e-06	4.4737e-05	DOWN	--	--	--	--	GO:0005488//GO:0003723//GO:0003674//GO:0097159//GO:0003676//GO:1901363	binding//RNA binding//molecular_function//organic cyclic compound binding//nucleic acid binding//heterocyclic compound binding	no KO assigned | (RefSeq) anthocyanidin 3-O-glucosyltransferase 2-like	http://www.genome.jp/dbget-bin/www_bget?sot:102594683	--	PREDICTED: putative UDP-glucose flavonoid 3-O-glucosyltransferase 3-like [Solanum tuberosum]
368	Novel02948	59.7793	139.42	-1.2217	0.0018737	0.0070565	DOWN	GO:0044271//GO:0006139//GO:1901360//GO:0044237//GO:0009059//GO:0043170//GO:0034641//GO:0016070//GO:0032774//GO:0018130//GO:0034654//GO:0010467//GO:0009058//GO:0006807//GO:0044238//GO:0046483//GO:0090304//GO:0008152//GO:1901576//GO:0044260//GO:0034645//GO:0006351//GO:0071704//GO:0097659//GO:0006725//GO:0044249//GO:0008150//GO:0019438//GO:0009987//GO:1901362	cellular nitrogen compound biosynthetic process//nucleobase-containing compound metabolic process//organic cyclic compound metabolic process//cellular metabolic process//macromolecule biosynthetic process//macromolecule metabolic process//cellular nitrogen compound metabolic process//RNA metabolic process//RNA biosynthetic process//heterocycle biosynthetic process//nucleobase-containing compound …	--	--	GO:0005488//GO:0003899//GO:0016772//GO:0003677//GO:0034062//GO:0016779//GO:0003674//GO:0016740//GO:1901363//GO:0003676//GO:0003824//GO:0097159	binding//DNA-directed 5'-3' RNA polymerase activity//transferase activity, transferring phosphorus-containing groups//DNA binding//5'-3' RNA polymerase activity//nucleotidyltransferase activity//molecular_function//transferase activity//heterocyclic compound binding//nucleic acid binding//catalytic activity//organic cyclic compound binding	no KO assigned | (RefSeq) formin-like protein 3	http://www.genome.jp/dbget-bin/www_bget?sot:102580908	--	PREDICTED: formin-like protein 5-like [Solanum tuberosum]
369	Novel02952	47.2613	100.125	-1.0831	0.014004	0.039378	DOWN	--	--	--	--	GO:0003674//GO:0005488//GO:0005515	molecular_function//binding//protein binding	K04733 interleukin-1 receptor-associated kinase 4 [EC:2.7.11.1] | (RefSeq) G-type lectin S-receptor-like serine/threonine-protein kinase SD2-5	http://www.genome.jp/dbget-bin/www_bget?sot:102584078	--	PREDICTED: G-type lectin S-receptor-like serine/threonine-protein kinase SD2-5-like [Solanum tuberosum]
370	Novel02964	36.3515	123.075	-1.7595	6.2163e-05	0.0003587	DOWN	--	--	--	--	GO:0005488//GO:0005515//GO:0003674	binding//protein binding//molecular_function	no KO assigned | (RefSeq) ankyrin repeat-containing protein At5g02620-like	http://www.genome.jp/dbget-bin/www_bget?sot:102585485	--	PREDICTED: ankyrin repeat-containing protein At3g12360-like, partial [Solanum tuberosum]
371	Novel02972	2725.85	6142.11	-1.172	8.1692e-07	7.4854e-06	DOWN	GO:0008150//GO:0050789//GO:0023052//GO:0009987//GO:0065007//GO:0050896//GO:0044419//GO:0050794//GO:0007165//GO:0044764//GO:0044403//GO:0016032//GO:0051716//GO:0051704//GO:0007154	biological_process//regulation of biological process//signaling//cellular process//biological regulation//response to stimulus//interspecies interaction between organisms//regulation of cellular process//signal transduction//multi-organism cellular process//symbiont process//viral process//cellular response to stimulus//multi-organism process//cell communication	GO:0005575//GO:0005576//GO:0044421//GO:0005615	cellular_component//extracellular region//extracellular region part//extracellular space	GO:0016740//GO:0003824//GO:0004673//GO:0016301//GO:0003674//GO:0038023//GO:0016772//GO:0004672//GO:0016775//GO:0000155//GO:0016773//GO:0005515//GO:0060089//GO:0005057//GO:0005488//GO:0004871	transferase activity//catalytic activity//protein histidine kinase activity//kinase activity//molecular_function//signaling receptor activity//transferase activity, transferring phosphorus-containing groups//protein kinase activity//phosphotransferase activity, nitrogenous group as acceptor//phosphorelay sensor kinase activity//phosphotransferase activity, alcohol group as acceptor//protein bindi…	K12616 enhancer of mRNA-decapping protein 4 | (RefSeq) enhancer of mRNA-decapping protein 4	http://www.genome.jp/dbget-bin/www_bget?sot:102599686	--	PREDICTED: enhancer of mRNA-decapping protein 4-like [Solanum tuberosum]
372	Novel02985	13.9322	53.5168	-1.9416	0.0019986	0.0074589	DOWN	--	--	--	--	--	--	no KO assigned | (RefSeq) uncharacterized LOC102600562	http://www.genome.jp/dbget-bin/www_bget?sot:102600562	--	PREDICTED: uncharacterized protein LOC102600562 isoform X1 [Solanum tuberosum]>gi|565355747|ref|XP_006344744.1| PREDICTED: uncharacterized protein LOC102600562 isoform X2 [Solanum tuberosum]
373	Novel03003	266.545	2381.32	-3.1593	1.3697e-14	5.1472e-13	DOWN	--	--	--	--	--	--	no KO assigned | (RefSeq) uncharacterized LOC102593697	http://www.genome.jp/dbget-bin/www_bget?sot:102593697	--	PREDICTED: uncharacterized protein LOC102593697 [Solanum tuberosum]
374	Novel03029	1.31037	25.15	-4.2625	0.00032892	0.0015647	DOWN	--	--	--	--	--	--	--	--	--	--
375	Novel03035	13.1237	206.621	-3.9767	1.1529e-16	6.14e-15	DOWN	--	--	--	--	--	--	K08900 mitochondrial chaperone BCS1 | (RefSeq) AAA-ATPase At3g50940-like	http://www.genome.jp/dbget-bin/www_bget?sot:102583264	--	putative RNA-directed DNA polymerase (Reverse transcriptase) [Malus domestica]
376	Novel03037	22.6377	176.046	-2.9591	1.1011e-11	2.6817e-10	DOWN	GO:0009987//GO:0008150//GO:0051234//GO:0006810//GO:0051179//GO:0055085	cellular process//biological_process//establishment of localization//transport//localization//transmembrane transport	GO:0005575//GO:0016020//GO:0031224//GO:0016021//GO:0044425	cellular_component//membrane//intrinsic component of membrane//integral component of membrane//membrane part	GO:0022857//GO:0003674//GO:0005215	transmembrane transporter activity//molecular_function//transporter activity	no KO assigned | (RefSeq) organic cation/carnitine transporter 7-like	http://www.genome.jp/dbget-bin/www_bget?sot:102582543	--	PREDICTED: organic cation/carnitine transporter 7-like [Solanum tuberosum]
377	Novel03044	18.7964	195.826	-3.381	8.7312e-07	7.9586e-06	DOWN	--	--	--	--	--	--	no KO assigned | (RefSeq) uncharacterized LOC102585412	http://www.genome.jp/dbget-bin/www_bget?sot:102585412	--	PREDICTED: uncharacterized protein LOC102585412 [Solanum tuberosum]
378	Novel03045	1147.23	2548.88	-1.1517	1.1771e-06	1.0379e-05	DOWN	--	--	--	--	--	--	no KO assigned | (RefSeq) uncharacterized LOC102578140	http://www.genome.jp/dbget-bin/www_bget?sot:102578140	--	PREDICTED: flocculation protein FLO11-like isoform X2 [Solanum tuberosum]
379	Novel03048	1035.04	2371.94	-1.1964	5.7874e-07	5.4701e-06	DOWN	GO:0008152//GO:0005975//GO:0071704//GO:0008150//GO:0044238	metabolic process//carbohydrate metabolic process//organic substance metabolic process//biological_process//primary metabolic process	--	--	GO:0016853//GO:0003674//GO:0003824//GO:0016866//GO:0016868	isomerase activity//molecular_function//catalytic activity//intramolecular transferase activity//intramolecular transferase activity, phosphotransferases	K01835 phosphoglucomutase [EC:5.4.2.2] | (RefSeq) phosphoglucomutase, cytoplasmic-like	http://www.genome.jp/dbget-bin/www_bget?sot:102593173	--	PREDICTED: phosphoglucomutase, cytoplasmic-like [Solanum tuberosum]
380	Novel03062	18.7189	86.4087	-2.2067	2.5987e-05	0.00016457	DOWN	--	--	--	--	--	--	--	--	--	PREDICTED: uncharacterized protein LOC102596609 [Solanum tuberosum]
381	Novel03063	717.488	1790.16	-1.3191	6.3571e-08	7.3694e-07	DOWN	GO:0051204//GO:0061024//GO:0009987//GO:0051234//GO:0008150//GO:0007006//GO:0032978//GO:0033365//GO:0033036//GO:0051649//GO:0034613//GO:0051641//GO:0051205//GO:0072657//GO:0071840//GO:0051179//GO:0006996//GO:0016043//GO:0072594//GO:0045184//GO:0070727//GO:0070585//GO:0090150//GO:0007005//GO:0008104//GO:0032979//GO:0072655	protein insertion into mitochondrial membrane//membrane organization//cellular process//establishment of localization//biological_process//mitochondrial membrane organization//protein insertion into membrane from inner side//protein localization to organelle//macromolecule localization//establishment of localization in cell//cellular protein localization//cellular localization//protein insertion …	GO:0031975//GO:0005740//GO:0043226//GO:0005743//GO:0043231//GO:0005575//GO:0016020//GO:0043227//GO:0044429//GO:0005739//GO:0005737//GO:0005622//GO:0044464//GO:0031967//GO:0019866//GO:0044444//GO:0005623//GO:0043229//GO:0044446//GO:0044422//GO:0031090//GO:0031966//GO:0044424	envelope//mitochondrial envelope//organelle//mitochondrial inner membrane//intracellular membrane-bounded organelle//cellular_component//membrane//membrane-bounded organelle//mitochondrial part//mitochondrion//cytoplasm//intracellular//cell part//organelle envelope//organelle inner membrane//cytoplasmic part//cell//intracellular organelle//intracellular organelle part//organelle part//organelle m…	--	--	no KO assigned | (RefSeq) protein LAZ1	http://www.genome.jp/dbget-bin/www_bget?sot:102602198	--	PREDICTED: transmembrane protein 184C-like isoform X1 [Solanum tuberosum]
382	Novel03078	603.405	1434.64	-1.2495	6.6371e-07	6.1924e-06	DOWN	GO:0044237//GO:0016310//GO:0043170//GO:0006464//GO:0044267//GO:0006468//GO:0044238//GO:0036211//GO:0019538//GO:0008152//GO:0006793//GO:0071704//GO:0044260//GO:0043412//GO:0008150//GO:0009987//GO:0006796	cellular metabolic process//phosphorylation//macromolecule metabolic process//cellular protein modification process//cellular protein metabolic process//protein phosphorylation//primary metabolic process//protein modification process//protein metabolic process//metabolic process//phosphorus metabolic process//organic substance metabolic process//cellular macromolecule metabolic process//macromole…	GO:0016020//GO:0005575	membrane//cellular_component	GO:0043168//GO:0032549//GO:0032559//GO:0005488//GO:1901265//GO:0097367//GO:0017076//GO:0001883//GO:0000166//GO:0001882//GO:0016772//GO:0004672//GO:0016773//GO:0032553//GO:0005524//GO:0016301//GO:0032550//GO:0035639//GO:0032555//GO:0043167//GO:0003674//GO:0036094//GO:0003824//GO:0030554//GO:1901363//GO:0016740//GO:0097159	anion binding//ribonucleoside binding//adenyl ribonucleotide binding//binding//nucleoside phosphate binding//carbohydrate derivative binding//purine nucleotide binding//purine nucleoside binding//nucleotide binding//nucleoside binding//transferase activity, transferring phosphorus-containing groups//protein kinase activity//phosphotransferase activity, alcohol group as acceptor//ribonucleotide bi…	K08838 serine/threonine-protein kinase 24/25/MST4 [EC:2.7.11.1] | (RefSeq) serine/threonine-protein kinase sid1	http://www.genome.jp/dbget-bin/www_bget?sot:102595112	--	PREDICTED: serine/threonine-protein kinase sid1-like [Solanum tuberosum]
383	Novel03087	1132.4	4863.76	-2.1027	8.1399e-13	2.4166e-11	DOWN	GO:0009987//GO:0006796//GO:0043412//GO:0008150//GO:0071704//GO:0044260//GO:0008152//GO:0006793//GO:0036211//GO:0006468//GO:0044238//GO:0019538//GO:0044267//GO:0043170//GO:0016310//GO:0006464//GO:0044237	cellular process//phosphate-containing compound metabolic process//macromolecule modification//biological_process//organic substance metabolic process//cellular macromolecule metabolic process//metabolic process//phosphorus metabolic process//protein modification process//protein phosphorylation//primary metabolic process//protein metabolic process//cellular protein metabolic process//macromolecu…	GO:0016020//GO:0005575	membrane//cellular_component	GO:0097159//GO:1901363//GO:0003824//GO:0030554//GO:0016740//GO:0043167//GO:0036094//GO:0003674//GO:0016301//GO:0005524//GO:0032553//GO:0032555//GO:0035639//GO:0032550//GO:0005515//GO:0016773//GO:0000166//GO:0001883//GO:0004672//GO:0016772//GO:0001882//GO:0097367//GO:1901265//GO:0017076//GO:0043168//GO:0005488//GO:0032549//GO:0032559	organic cyclic compound binding//heterocyclic compound binding//catalytic activity//adenyl nucleotide binding//transferase activity//ion binding//small molecule binding//molecular_function//kinase activity//ATP binding//ribonucleotide binding//purine ribonucleotide binding//purine ribonucleoside triphosphate binding//purine ribonucleoside binding//protein binding//phosphotransferase activity, alc…	no KO assigned | (RefSeq) probable LRR receptor-like serine/threonine-protein kinase At1g56140	http://www.genome.jp/dbget-bin/www_bget?sot:102587261	--	PREDICTED: probable LRR receptor-like serine/threonine-protein kinase At1g56140-like [Solanum tuberosum]
384	Novel03089	107.946	496.664	-2.202	1.2187e-07	1.3263e-06	DOWN	--	--	--	--	--	--	no KO assigned | (RefSeq) flowering time control protein FCA-like	http://www.genome.jp/dbget-bin/www_bget?sot:102600961	--	PREDICTED: flowering time control protein FCA-like isoform X2 [Solanum tuberosum]
385	Novel03090	0.3121	21.9456	-6.1358	0.010268	0.030235	DOWN	--	--	--	--	--	--	--	--	--	--
386	Novel03092	22.3899	67.7721	-1.5978	0.0079127	0.024228	DOWN	--	--	--	--	GO:0017076//GO:0097367//GO:1901265//GO:0005488//GO:0032549//GO:0032559//GO:0043168//GO:0005515//GO:0001882//GO:0000166//GO:0001883//GO:0036094//GO:0003674//GO:0043167//GO:0032555//GO:0043531//GO:0032550//GO:0032553//GO:0097159//GO:1901363//GO:0030554	purine nucleotide binding//carbohydrate derivative binding//nucleoside phosphate binding//binding//ribonucleoside binding//adenyl ribonucleotide binding//anion binding//protein binding//nucleoside binding//nucleotide binding//purine nucleoside binding//small molecule binding//molecular_function//ion binding//purine ribonucleotide binding//ADP binding//purine ribonucleoside binding//ribonucleotide…	K13459 disease resistance protein RPS2 | (RefSeq) disease resistance protein At4g27190-like	http://www.genome.jp/dbget-bin/www_bget?sot:102596811	--	PREDICTED: disease resistance protein At4g27190-like [Solanum tuberosum]
387	Novel03104	44.6543	220.826	-2.306	0.002538	0.0091663	DOWN	GO:0022402//GO:0000226//GO:0043933//GO:0071840//GO:0006996//GO:0007010//GO:0016043//GO:0007049//GO:0007017//GO:1903047//GO:0008150//GO:0007051//GO:0000278//GO:0007052//GO:0009987	cell cycle process//microtubule cytoskeleton organization//protein-containing complex subunit organization//cellular component organization or biogenesis//organelle organization//cytoskeleton organization//cellular component organization//cell cycle//microtubule-based process//mitotic cell cycle process//biological_process//spindle organization//mitotic cell cycle//mitotic spindle organization//c…	GO:0043232//GO:0044424//GO:0031981//GO:0044446//GO:0043229//GO:0000780//GO:0044422//GO:0000794//GO:0005694//GO:0000777//GO:0044428//GO:0044454//GO:0044427//GO:0043228//GO:0000942//GO:0005819//GO:0005623//GO:0031974//GO:0005634//GO:0005622//GO:0044464//GO:0000793//GO:0043233//GO:0000779//GO:0000776//GO:0070013//GO:0072686//GO:0042729//GO:0043231//GO:0005575//GO:0032991//GO:0043227//GO:0015630//GO:…	intracellular non-membrane-bounded organelle//intracellular part//nuclear lumen//intracellular organelle part//intracellular organelle//condensed nuclear chromosome, centromeric region//organelle part//condensed nuclear chromosome//chromosome//condensed chromosome kinetochore//nuclear part//nuclear chromosome part//chromosomal part//non-membrane-bounded organelle//condensed nuclear chromosome out…	--	--	no KO assigned | (RefSeq) F-box protein At5g03100-like	http://www.genome.jp/dbget-bin/www_bget?sot:102590602	--	PREDICTED: putative F-box/LRR-repeat protein At3g28410-like [Solanum tuberosum]
388	Novel03106	4863.91	19956.9	-2.0367	2.4921e-18	1.6626e-16	DOWN	GO:1901360//GO:0006139//GO:0044237//GO:0006313//GO:0043170//GO:0034641//GO:0006259//GO:0006310//GO:0006807//GO:0044238//GO:0046483//GO:0090304//GO:0032196//GO:0008152//GO:0044260//GO:0015074//GO:0071704//GO:0006725//GO:0008150//GO:0009987	organic cyclic compound metabolic process//nucleobase-containing compound metabolic process//cellular metabolic process//transposition, DNA-mediated//macromolecule metabolic process//cellular nitrogen compound metabolic process//DNA metabolic process//DNA recombination//nitrogen compound metabolic process//primary metabolic process//heterocycle metabolic process//nucleic acid metabolic process//t…	--	--	GO:0005488//GO:0016763//GO:0003677//GO:0003950//GO:0004803//GO:0016757//GO:0003674//GO:0016740//GO:1901363//GO:0003676//GO:0003824//GO:0097159	binding//transferase activity, transferring pentosyl groups//DNA binding//NAD+ ADP-ribosyltransferase activity//transposase activity//transferase activity, transferring glycosyl groups//molecular_function//transferase activity//heterocyclic compound binding//nucleic acid binding//catalytic activity//organic cyclic compound binding	no KO assigned | (RefSeq) inactive poly [ADP-ribose] polymerase RCD1	http://www.genome.jp/dbget-bin/www_bget?sot:102584569	--	PREDICTED: inactive poly [ADP-ribose] polymerase RCD1-like isoform X1 [Solanum tuberosum]>gi|565391106|ref|XP_006361266.1| PREDICTED: inactive poly [ADP-ribose] polymerase RCD1-like isoform X2 [Solanum tuberosum]
389	Novel03114	107.062	625.712	-2.547	5.1162e-15	2.0779e-13	DOWN	--	--	--	--	GO:0005488//GO:0005515//GO:0003674	binding//protein binding//molecular_function	no KO assigned | (RefSeq) C2 and GRAM domain-containing protein At1g03370-like	http://www.genome.jp/dbget-bin/www_bget?sot:102604959	--	PREDICTED: C2 and GRAM domain-containing protein At1g03370-like [Solanum tuberosum]
390	Novel03124	2.99784	44.6915	-3.898	0.0032167	0.011205	DOWN	--	--	--	--	--	--	--	--	--	PREDICTED: uncharacterized protein LOC104092110 isoform X4 [Nicotiana tomentosiformis]
391	Novel03134	1678.01	3582.68	-1.0943	3.1075e-06	2.4608e-05	DOWN	GO:0008152//GO:0008150//GO:0055114	metabolic process//biological_process//oxidation-reduction process	--	--	GO:0003674//GO:0003824//GO:0016491	molecular_function//catalytic activity//oxidoreductase activity	K12657 delta-1-pyrroline-5-carboxylate synthetase [EC:2.7.2.11 1.2.1.41] | (RefSeq) delta-1-pyrroline-5-carboxylate synthase	http://www.genome.jp/dbget-bin/www_bget?sot:102582423	--	PREDICTED: delta-1-pyrroline-5-carboxylate synthase-like [Solanum tuberosum]
392	Novel03142	687.508	2112.4	-1.6194	3.3161e-11	7.4414e-10	DOWN	--	--	--	--	--	--	no KO assigned | (RefSeq) probable phosphoinositide phosphatase SAC9	http://www.genome.jp/dbget-bin/www_bget?sot:102597300	--	PREDICTED: probable phosphoinositide phosphatase SAC9-like isoform X1 [Solanum tuberosum]>gi|565359848|ref|XP_006346700.1| PREDICTED: probable phosphoinositide phosphatase SAC9-like isoform X2 [Solanum tuberosum]
393	Novel03147	178.176	357.521	-1.0047	0.00086302	0.0036066	DOWN	--	--	--	--	--	--	--	--	--	PREDICTED: uncharacterized protein LOC102596344 [Solanum tuberosum]
394	Novel03153	27.347	297.581	-3.4438	2.2332e-10	4.3107e-09	DOWN	GO:0008152//GO:0071704//GO:0044260//GO:0030001//GO:0043412//GO:0051234//GO:0006810//GO:0008150//GO:0009987//GO:0044237//GO:0006811//GO:0006812//GO:0043170//GO:0006464//GO:0044267//GO:0044238//GO:0017013//GO:0036211//GO:0051179//GO:0019538	metabolic process//organic substance metabolic process//cellular macromolecule metabolic process//metal ion transport//macromolecule modification//establishment of localization//transport//biological_process//cellular process//cellular metabolic process//ion transport//cation transport//macromolecule metabolic process//cellular protein modification process//cellular protein metabolic process//pri…	--	--	GO:0043167//GO:0003674//GO:0005488//GO:0046872//GO:0043169	ion binding//molecular_function//binding//metal ion binding//cation binding	K01533 Cu2+-exporting ATPase [EC:3.6.3.4] | (RefSeq) copper-transporting ATPase PAA2, chloroplastic-like	http://www.genome.jp/dbget-bin/www_bget?sot:102597236	--	PREDICTED: copper-transporting ATPase PAA2, chloroplastic-like isoform X4 [Solanum tuberosum]
395	Novel03158	792.173	2378.66	-1.5863	3.5212e-05	0.0002159	DOWN	GO:0019538//GO:0044238//GO:0043170//GO:0008150//GO:0006508//GO:0008152//GO:0071704	protein metabolic process//primary metabolic process//macromolecule metabolic process//biological_process//proteolysis//metabolic process//organic substance metabolic process	--	--	GO:0008238//GO:0005515//GO:0005488//GO:0008233//GO:0003824//GO:0004180//GO:0070011//GO:0016787//GO:0003674	exopeptidase activity//protein binding//binding//peptidase activity//catalytic activity//carboxypeptidase activity//peptidase activity, acting on L-amino acid peptides//hydrolase activity//molecular_function	no KO assigned | (RefSeq) ankyrin repeat-containing protein At3g12360-like	http://www.genome.jp/dbget-bin/www_bget?sot:102604201	--	PREDICTED: ankyrin repeat-containing protein At3g12360-like [Solanum tuberosum]
396	Novel03159	917.449	3638.65	-1.9877	2.1886e-16	1.1241e-14	DOWN	GO:0006464//GO:0051704//GO:0043170//GO:0009877//GO:0006399//GO:0016072//GO:0006139//GO:1901360//GO:0044237//GO:0044403//GO:0032259//GO:0010467//GO:0071840//GO:0006807//GO:0034470//GO:0019538//GO:0009058//GO:0046483//GO:0042254//GO:0044238//GO:0036211//GO:0090304//GO:0034641//GO:0016070//GO:0044419//GO:0044267//GO:0044085//GO:1901576//GO:0044260//GO:0005975//GO:0071704//GO:0006364//GO:0006725//GO:…	cellular protein modification process//multi-organism process//macromolecule metabolic process//nodulation//tRNA metabolic process//rRNA metabolic process//nucleobase-containing compound metabolic process//organic cyclic compound metabolic process//cellular metabolic process//symbiont process//methylation//gene expression//cellular component organization or biogenesis//nitrogen compound metabolic…	GO:0044424//GO:0005622//GO:0044464//GO:0005623//GO:0005575//GO:0005737	intracellular part//intracellular//cell part//cell//cellular_component//cytoplasm	GO:0008276//GO:0005488//GO:0016278//GO:0042054//GO:0051998//GO:0010340//GO:0003677//GO:0008757//GO:0008173//GO:0008168//GO:0008175//GO:0003674//GO:0016279//GO:0008170//GO:0008171//GO:0008176//GO:0016741//GO:0016423//GO:0008649//GO:0097159//GO:0018024//GO:0016740//GO:0003676//GO:1901363//GO:0004719//GO:0003824	protein methyltransferase activity//binding//lysine N-methyltransferase activity//histone methyltransferase activity//protein carboxyl O-methyltransferase activity//carboxyl-O-methyltransferase activity//DNA binding//S-adenosylmethionine-dependent methyltransferase activity//RNA methyltransferase activity//methyltransferase activity//tRNA methyltransferase activity//molecular_function//protein-ly…	no KO assigned | (RefSeq) (S)-coclaurine N-methyltransferase-like	http://www.genome.jp/dbget-bin/www_bget?sot:102601274	--	PREDICTED: (S)-coclaurine N-methyltransferase-like [Solanum tuberosum]
397	Novel03161	361.455	954.713	-1.4012	1.016e-07	1.1284e-06	DOWN	GO:0016032//GO:0044403//GO:0044800//GO:0039663//GO:0044803//GO:0051701//GO:0051704//GO:0044419//GO:0061025//GO:0019058//GO:0044764//GO:0052126//GO:0016043//GO:0051828//GO:0030260//GO:0071840//GO:0051806//GO:0019064//GO:0052192//GO:0008150//GO:0009987//GO:0040011//GO:0061024//GO:0046718//GO:0044409	viral process//symbiont process//multi-organism membrane fusion//membrane fusion involved in viral entry into host cell//multi-organism membrane organization//interaction with host//multi-organism process//interspecies interaction between organisms//membrane fusion//viral life cycle//multi-organism cellular process//movement in host environment//cellular component organization//entry into other o…	GO:0044424//GO:0036338//GO:0043229//GO:0005623//GO:0044464//GO:0005622//GO:0019031//GO:0005634//GO:0044423//GO:0019012//GO:0043227//GO:0005575//GO:0043231//GO:0043226	intracellular part//viral membrane//intracellular organelle//cell//cell part//intracellular//viral envelope//nucleus//virion part//virion//membrane-bounded organelle//cellular_component//intracellular membrane-bounded organelle//organelle	GO:0005488//GO:0008757//GO:0046789//GO:0046812//GO:0005515//GO:0016741//GO:0016429//GO:0016426//GO:0008173//GO:0008168//GO:0003674//GO:0008175//GO:0005102//GO:0003824//GO:0016740	binding//S-adenosylmethionine-dependent methyltransferase activity//host cell surface receptor binding//host cell surface binding//protein binding//transferase activity, transferring one-carbon groups//tRNA (adenine-N1-)-methyltransferase activity//tRNA (adenine) methyltransferase activity//RNA methyltransferase activity//methyltransferase activity//molecular_function//tRNA methyltransferase acti…	K12737 peptidyl-prolyl cis-trans isomerase SDCCAG10 [EC:5.2.1.8] | (RefSeq) peptidyl-prolyl cis-trans isomerase CYP57	http://www.genome.jp/dbget-bin/www_bget?sot:102599071	--	PREDICTED: peptidyl-prolyl cis-trans isomerase CWC27 homolog isoform X1 [Solanum tuberosum]
398	Novel03169	16.8897	135.821	-3.0075	6.1425e-10	1.0946e-08	DOWN	GO:0044238//GO:0008150//GO:0008152//GO:0071704//GO:0005975	primary metabolic process//biological_process//metabolic process//organic substance metabolic process//carbohydrate metabolic process	--	--	GO:0005515//GO:0005488//GO:0003824//GO:0003674	protein binding//binding//catalytic activity//molecular_function	K01115 phospholipase D1/2 [EC:3.1.4.4] | (RefSeq) phospholipase D alpha 1-like	http://www.genome.jp/dbget-bin/www_bget?sot:102589221	--	PREDICTED: phospholipase D alpha 1-like [Solanum tuberosum]
399	Novel03187	38.451	97.7905	-1.3467	0.0037471	0.012806	DOWN	--	--	--	--	--	--	--	--	--	PREDICTED: putative ribonuclease H protein At1g65750-like [Solanum tuberosum]
400	Novel03213	3700.28	10573.1	-1.5147	0.00051517	0.0023093	DOWN	GO:0007154//GO:0051704//GO:0044403//GO:0016032//GO:0051716//GO:0007165//GO:0016043//GO:0044764//GO:0022607//GO:0071840//GO:0019058//GO:0044085//GO:0050794//GO:0050896//GO:0044419//GO:0065007//GO:0016055//GO:0019068//GO:0007166//GO:0009987//GO:0023052//GO:0008150//GO:0050789	cell communication//multi-organism process//symbiont process//viral process//cellular response to stimulus//signal transduction//cellular component organization//multi-organism cellular process//cellular component assembly//cellular component organization or biogenesis//viral life cycle//cellular component biogenesis//regulation of cellular process//response to stimulus//interspecies interaction …	GO:0016020//GO:0005575	membrane//cellular_component	GO:0005488//GO:0005515//GO:0003674//GO:0008013	binding//protein binding//molecular_function//beta-catenin binding	K19525 vacuolar protein sorting-associated protein 13A/C | (RefSeq) uncharacterized LOC102583893	http://www.genome.jp/dbget-bin/www_bget?sot:102583893	--	PREDICTED: uncharacterized protein LOC102583893 [Solanum tuberosum]
401	Novel03223	3.70952	173.144	-5.5446	6.4976e-06	4.7454e-05	DOWN	--	--	--	--	--	--	no KO assigned | (RefSeq) subtilisin-like protease SBT1.2	http://www.genome.jp/dbget-bin/www_bget?sot:102589706	--	PREDICTED: subtilisin-like protease SDD1-like [Solanum tuberosum]
402	Novel03225	818.922	1720.64	-1.0711	5.2043e-05	0.00030575	DOWN	--	--	--	--	--	--	no KO assigned | (RefSeq) uncharacterized LOC102581574	http://www.genome.jp/dbget-bin/www_bget?sot:102581574	--	PREDICTED: uncharacterized protein LOC102581574 [Solanum tuberosum]
403	Novel03236	2564.7	5880.12	-1.1971	2.8358e-06	2.2662e-05	DOWN	GO:0044237//GO:0044271//GO:0006139//GO:1901360//GO:0043043//GO:0008104//GO:0043170//GO:0045047//GO:0034655//GO:0009059//GO:0070972//GO:1901361//GO:0090150//GO:0044267//GO:0070727//GO:0034641//GO:0016070//GO:0006886//GO:0000184//GO:0006614//GO:0072594//GO:0045184//GO:0046483//GO:0044238//GO:0016043//GO:0015031//GO:0090304//GO:0006412//GO:0071840//GO:0043603//GO:0010467//GO:0000956//GO:0051179//GO:…	cellular metabolic process//cellular nitrogen compound biosynthetic process//nucleobase-containing compound metabolic process//organic cyclic compound metabolic process//peptide biosynthetic process//protein localization//macromolecule metabolic process//protein targeting to ER//nucleobase-containing compound catabolic process//macromolecule biosynthetic process//protein localization to endoplasm…	GO:0044424//GO:0043232//GO:0043229//GO:0044444//GO:0005623//GO:0043228//GO:0044464//GO:0005622//GO:0005737//GO:0005840//GO:0032991//GO:0005575//GO:0043226	intracellular part//intracellular non-membrane-bounded organelle//intracellular organelle//cytoplasmic part//cell//non-membrane-bounded organelle//cell part//intracellular//cytoplasm//ribosome//protein-containing complex//cellular_component//organelle	GO:0043168//GO:0005488//GO:0016817//GO:0032549//GO:0032559//GO:0097367//GO:0046872//GO:1901265//GO:0017076//GO:0000166//GO:0003677//GO:0001883//GO:0005525//GO:0001882//GO:0043169//GO:0032561//GO:0046914//GO:0017111//GO:0005524//GO:0032553//GO:0032555//GO:0035639//GO:0016787//GO:0032550//GO:0008270//GO:0043167//GO:0016818//GO:0036094//GO:0003674//GO:1901363//GO:0003676//GO:0003824//GO:0030554//GO:…	anion binding//binding//hydrolase activity, acting on acid anhydrides//ribonucleoside binding//adenyl ribonucleotide binding//carbohydrate derivative binding//metal ion binding//nucleoside phosphate binding//purine nucleotide binding//nucleotide binding//DNA binding//purine nucleoside binding//GTP binding//nucleoside binding//cation binding//guanyl ribonucleotide binding//transition metal ion bin…	K14326 regulator of nonsense transcripts 1 [EC:3.6.4.-] | (RefSeq) regulator of nonsense transcripts 1 homolog	http://www.genome.jp/dbget-bin/www_bget?sot:102597499	--	PREDICTED: regulator of nonsense transcripts 1 homolog [Solanum tuberosum]
404	Novel03239	1933.83	4425.05	-1.1942	0.00058664	0.0025779	DOWN	GO:0009058//GO:0008152//GO:0008150	biosynthetic process//metabolic process//biological_process	--	--	GO:0048037//GO:0043168//GO:0000149//GO:0005488//GO:0005515//GO:0043167//GO:0030170//GO:0003674//GO:0097159//GO:0019905//GO:1901363	cofactor binding//anion binding//SNARE binding//binding//protein binding//ion binding//pyridoxal phosphate binding//molecular_function//organic cyclic compound binding//syntaxin binding//heterocyclic compound binding	no KO assigned | (RefSeq) GRIP and coiled-coil domain-containing protein 2	http://www.genome.jp/dbget-bin/www_bget?sot:102580782	--	PREDICTED: sporulation-specific protein 15-like isoform X1 [Solanum tuberosum]
405	Novel03245	88.8694	287.536	-1.694	4.069e-07	3.9723e-06	DOWN	GO:0008150//GO:0051817//GO:0019087//GO:0009987//GO:0065008//GO:0044003//GO:0035821//GO:0065007//GO:0044419//GO:0044764//GO:0044403//GO:0016032//GO:0051704//GO:0051701//GO:0019048	biological_process//modification of morphology or physiology of other organism involved in symbiotic interaction//transformation of host cell by virus//cellular process//regulation of biological quality//modification by symbiont of host morphology or physiology//modification of morphology or physiology of other organism//biological regulation//interspecies interaction between organisms//multi-org…	GO:0005575//GO:0016020//GO:0031224//GO:0044425//GO:0016021	cellular_component//membrane//intrinsic component of membrane//membrane part//integral component of membrane	--	--	--	--	--	--
406	Novel03247	12.5732	124.256	-3.3049	0.0014051	0.0055033	DOWN	GO:0055114//GO:0008150//GO:0008152	oxidation-reduction process//biological_process//metabolic process	--	--	GO:0046914//GO:0043169//GO:0016705//GO:0020037//GO:0046872//GO:0005488//GO:0097159//GO:0016491//GO:1901363//GO:0003824//GO:0003674//GO:0043167//GO:0005506//GO:0046906	transition metal ion binding//cation binding//oxidoreductase activity, acting on paired donors, with incorporation or reduction of molecular oxygen//heme binding//metal ion binding//binding//organic cyclic compound binding//oxidoreductase activity//heterocyclic compound binding//catalytic activity//molecular_function//ion binding//iron ion binding//tetrapyrrole binding	no KO assigned | (RefSeq) cytochrome P450 87A3-like	http://www.genome.jp/dbget-bin/www_bget?sot:102602705	--	PREDICTED: cytochrome P450 87A3-like [Solanum tuberosum]
407	Novel03260	1313.76	3210.97	-1.2893	6.8409e-08	7.8779e-07	DOWN	GO:1902600//GO:0006811//GO:0009156//GO:0044237//GO:0042278//GO:0006753//GO:0072522//GO:0006812//GO:0055085//GO:0044271//GO:1901360//GO:0006139//GO:0019222//GO:0043170//GO:0009059//GO:0019219//GO:0009206//GO:1901659//GO:0009161//GO:0034654//GO:0060255//GO:0010556//GO:1901135//GO:0009119//GO:0018130//GO:0050794//GO:0009116//GO:0072521//GO:0065007//GO:0032774//GO:0009165//GO:0010468//GO:0090407//GO:…	proton transmembrane transport//ion transport//ribonucleoside monophosphate biosynthetic process//cellular metabolic process//purine nucleoside metabolic process//nucleoside phosphate metabolic process//purine-containing compound biosynthetic process//cation transport//transmembrane transport//cellular nitrogen compound biosynthetic process//organic cyclic compound metabolic process//nucleobase-c…	GO:0031981//GO:0044425//GO:0044424//GO:0016592//GO:0045259//GO:0031966//GO:0000276//GO:0031090//GO:0044428//GO:0005753//GO:0044446//GO:0043229//GO:0005654//GO:0044422//GO:0019866//GO:0044444//GO:0005623//GO:0045263//GO:0031967//GO:0044455//GO:0044464//GO:0005634//GO:0005622//GO:0031974//GO:0005737//GO:0044451//GO:0043233//GO:0016020//GO:0043227//GO:0032991//GO:0044429//GO:0005739//GO:0043231//GO:…	nuclear lumen//membrane part//intracellular part//mediator complex//proton-transporting ATP synthase complex//mitochondrial membrane//mitochondrial proton-transporting ATP synthase complex, coupling factor F(o)//organelle membrane//nuclear part//mitochondrial proton-transporting ATP synthase complex//intracellular organelle part//intracellular organelle//nucleoplasm//organelle part//organelle inn…	GO:0000989//GO:0001076//GO:0015078//GO:0003712//GO:0015075//GO:0008324//GO:0022890//GO:0005215//GO:0000988//GO:0003674//GO:0015077//GO:0022857	transcription factor activity, transcription factor binding//transcription factor activity, RNA polymerase II transcription factor binding//proton transmembrane transporter activity//transcription coregulator activity//ion transmembrane transporter activity//cation transmembrane transporter activity//inorganic cation transmembrane transporter activity//transporter activity//transcription factor a…	no KO assigned | (RefSeq) guanine nucleotide exchange factor SPIKE 1	http://www.genome.jp/dbget-bin/www_bget?sot:102590845	--	PREDICTED: dedicator of cytokinesis protein 7-like [Solanum tuberosum]
408	Novel03277	7154.12	19141.7	-1.4199	4.4186e-10	8.0677e-09	DOWN	GO:0008152//GO:0048522//GO:0071704//GO:0048583//GO:1901576//GO:0009966//GO:0023052//GO:0050789//GO:0044249//GO:0008150//GO:0006720//GO:0009987//GO:0023056//GO:0008610//GO:0044237//GO:0051716//GO:1902531//GO:0010646//GO:0023051//GO:1902533//GO:0007154//GO:0044255//GO:0016114//GO:0006721//GO:0048518//GO:0050896//GO:0050794//GO:0043122//GO:0006629//GO:0065007//GO:0044238//GO:0007249//GO:0008299//GO:…	metabolic process//positive regulation of cellular process//organic substance metabolic process//regulation of response to stimulus//organic substance biosynthetic process//regulation of signal transduction//signaling//regulation of biological process//cellular biosynthetic process//biological_process//isoprenoid metabolic process//cellular process//positive regulation of signaling//lipid biosynt…	GO:0043227//GO:0005575//GO:0043231//GO:0043226//GO:0044424//GO:0043229//GO:0005623//GO:0044464//GO:0005622//GO:0005634	membrane-bounded organelle//cellular_component//intracellular membrane-bounded organelle//organelle//intracellular part//intracellular organelle//cell//cell part//intracellular//nucleus	GO:0016829//GO:0016301//GO:0032553//GO:0005524//GO:0016849//GO:0035639//GO:0032555//GO:0016787//GO:0008270//GO:0032550//GO:0038023//GO:0043167//GO:0003674//GO:0016818//GO:0036094//GO:0003676//GO:1901363//GO:0008685//GO:0030554//GO:0003824//GO:0016740//GO:0016462//GO:0004386//GO:0097159//GO:0004673//GO:0043168//GO:0005488//GO:0032559//GO:0016817//GO:0032549//GO:0004871//GO:0046872//GO:0097367//GO:…	lyase activity//kinase activity//ribonucleotide binding//ATP binding//phosphorus-oxygen lyase activity//purine ribonucleoside triphosphate binding//purine ribonucleotide binding//hydrolase activity//zinc ion binding//purine ribonucleoside binding//signaling receptor activity//ion binding//molecular_function//hydrolase activity, acting on acid anhydrides, in phosphorus-containing anhydrides//small…	no KO assigned | (RefSeq) DEAD-box ATP-dependent RNA helicase 3, chloroplastic	http://www.genome.jp/dbget-bin/www_bget?sot:102586405	--	PREDICTED: DEAD-box ATP-dependent RNA helicase 3, chloroplastic-like [Solanum tuberosum]
409	Novel03288	52.8727	653.123	-3.6268	4.0823e-05	0.00024574	DOWN	--	--	--	--	GO:0003824//GO:0016788//GO:0003674//GO:0016787//GO:0042578	catalytic activity//hydrolase activity, acting on ester bonds//molecular_function//hydrolase activity//phosphoric ester hydrolase activity	no KO assigned | (RefSeq) probable phosphoinositide phosphatase SAC9	http://www.genome.jp/dbget-bin/www_bget?sot:102597300	--	PREDICTED: probable phosphoinositide phosphatase SAC9-like isoform X1 [Solanum tuberosum]>gi|565359848|ref|XP_006346700.1| PREDICTED: probable phosphoinositide phosphatase SAC9-like isoform X2 [Solanum tuberosum]
410	Novel03292	464.457	1170.18	-1.3331	1.5435e-07	1.6395e-06	DOWN	--	--	--	--	GO:0003674//GO:0005515//GO:0005488	molecular_function//protein binding//binding	K15361 WD repeat-containing protein 48 | (RefSeq) WD repeat-containing protein 48-like	http://www.genome.jp/dbget-bin/www_bget?sot:102603653	--	PREDICTED: WD repeat-containing protein 48-like isoform X1 [Solanum tuberosum]>gi|565382820|ref|XP_006357728.1| PREDICTED: WD repeat-containing protein 48-like isoform X2 [Solanum tuberosum]
411	Novel03299	21.1957	78.9392	-1.897	0.00040154	0.00186	DOWN	--	--	--	--	--	--	K00927 phosphoglycerate kinase [EC:2.7.2.3] | (RefSeq) phosphoglycerate kinase, chloroplastic	http://www.genome.jp/dbget-bin/www_bget?sot:102577647	--	hypothetical protein VITISV_032980 [Vitis vinifera]
412	Novel03308	668.657	1727.53	-1.3694	3.189e-08	3.95e-07	DOWN	--	--	--	--	GO:0005515//GO:0005488//GO:0003674	protein binding//binding//molecular_function	K17613 calcineurin-binding protein cabin-1 | (RefSeq) uncharacterized LOC102598077	http://www.genome.jp/dbget-bin/www_bget?sot:102598077	--	PREDICTED: uncharacterized protein LOC102598077 [Solanum tuberosum]
413	Novel03314	836.447	1877.71	-1.1666	1.4013e-06	1.2129e-05	DOWN	GO:0008150//GO:0009987//GO:0006396//GO:0000372//GO:0000375//GO:0008152//GO:0000376//GO:0071704//GO:0006725//GO:0044260//GO:0016070//GO:0034641//GO:0046483//GO:0044238//GO:0090304//GO:0010467//GO:0006807//GO:0044237//GO:0006139//GO:1901360//GO:0043170//GO:0008380	biological_process//cellular process//RNA processing//Group I intron splicing//RNA splicing, via transesterification reactions//metabolic process//RNA splicing, via transesterification reactions with guanosine as nucleophile//organic substance metabolic process//cellular aromatic compound metabolic process//cellular macromolecule metabolic process//RNA metabolic process//cellular nitrogen compoun…	GO:0032991//GO:0005575//GO:0005623//GO:0044464//GO:0005622//GO:0044424	protein-containing complex//cellular_component//cell//cell part//intracellular//intracellular part	--	--	K14304 nuclear pore complex protein Nup85 | (RefSeq) nuclear pore complex protein NUP85	http://www.genome.jp/dbget-bin/www_bget?sot:102591614	--	PREDICTED: nuclear pore complex protein Nup85-like isoform X1 [Solanum tuberosum]
414	Novel03325	1716.41	3875.8	-1.1751	0.0035723	0.012278	DOWN	--	--	--	--	GO:0005515//GO:0005488//GO:0003674	protein binding//binding//molecular_function	K19027 zinc finger FYVE domain-containing protein 26 | (RefSeq) protein DDB_G0276689	http://www.genome.jp/dbget-bin/www_bget?sot:102586412	--	PREDICTED: uncharacterized protein LOC102586412 [Solanum tuberosum]
415	Novel03335	489.642	2941.9	-2.5869	2.9707e-06	2.3588e-05	DOWN	GO:0044238//GO:0055114//GO:0008150//GO:0005975//GO:0071704//GO:0008152	primary metabolic process//oxidation-reduction process//biological_process//carbohydrate metabolic process//organic substance metabolic process//metabolic process	--	--	GO:0016655//GO:0016798//GO:0016491//GO:0016651//GO:0003824//GO:0003674//GO:0016787//GO:0004553	oxidoreductase activity, acting on NAD(P)H, quinone or similar compound as acceptor//hydrolase activity, acting on glycosyl bonds//oxidoreductase activity//oxidoreductase activity, acting on NAD(P)H//catalytic activity//molecular_function//hydrolase activity//hydrolase activity, hydrolyzing O-glycosyl compounds	K12446 L-arabinokinase [EC:2.7.1.46] | (RefSeq) L-arabinokinase-like	http://www.genome.jp/dbget-bin/www_bget?sot:102582665	--	PREDICTED: L-arabinokinase-like [Solanum tuberosum]
416	Novel03367	8.54368	33.4025	-1.967	0.01295	0.036869	DOWN	--	--	--	--	--	--	--	--	--	--
417	Novel03370	369.387	876.437	-1.2465	2.1819e-06	1.7933e-05	DOWN	GO:0090304//GO:0044238//GO:0046483//GO:0006955//GO:0006310//GO:0006807//GO:0050896//GO:0006259//GO:0034641//GO:0006313//GO:0043170//GO:0044237//GO:0006139//GO:1901360//GO:0002376//GO:0009987//GO:0008150//GO:0006725//GO:0071704//GO:0044260//GO:0008152//GO:0032196	nucleic acid metabolic process//primary metabolic process//heterocycle metabolic process//immune response//DNA recombination//nitrogen compound metabolic process//response to stimulus//DNA metabolic process//cellular nitrogen compound metabolic process//transposition, DNA-mediated//macromolecule metabolic process//cellular metabolic process//nucleobase-containing compound metabolic process//organ…	GO:0005576//GO:0005575	extracellular region//cellular_component	GO:0043169//GO:0005137//GO:0046914//GO:0005515//GO:0003677//GO:0046872//GO:0005126//GO:0005488//GO:0097159//GO:0003824//GO:1901363//GO:0003676//GO:0005102//GO:0043167//GO:0003674//GO:0004803//GO:0070851//GO:0008270//GO:0008083	cation binding//interleukin-5 receptor binding//transition metal ion binding//protein binding//DNA binding//metal ion binding//cytokine receptor binding//binding//organic cyclic compound binding//catalytic activity//heterocyclic compound binding//nucleic acid binding//signaling receptor binding//ion binding//molecular_function//transposase activity//growth factor receptor binding//zinc ion bindin…	no KO assigned | (RefSeq) uncharacterized LOC102583698	http://www.genome.jp/dbget-bin/www_bget?sot:102583698	--	PREDICTED: uncharacterized protein LOC102583698 [Solanum tuberosum]
418	Novel03380	1508.22	3031.72	-1.0073	0.013307	0.037726	DOWN	GO:1904377//GO:0048522//GO:0071702//GO:0051641//GO:1904375//GO:0071478//GO:0032386//GO:0031570//GO:0033036//GO:0006893//GO:0051223//GO:0010256//GO:0000075//GO:0034613//GO:1903649//GO:0051649//GO:0042996//GO:0033157//GO:0032880//GO:0050789//GO:0008150//GO:0006810//GO:0051234//GO:0060341//GO:0051049//GO:0043001//GO:0046907//GO:0061024//GO:0070201//GO:0060627//GO:1903827//GO:0033554//GO:0009987//GO:…	positive regulation of protein localization to cell periphery//positive regulation of cellular process//organic substance transport//cellular localization//regulation of protein localization to cell periphery//cellular response to radiation//regulation of intracellular transport//DNA integrity checkpoint//macromolecule localization//Golgi to plasma membrane transport//regulation of protein transp…	GO:0005802//GO:0005794//GO:0098791//GO:0005737//GO:0005575//GO:0043231//GO:0031984//GO:0043227//GO:0044431//GO:0043226//GO:0044424//GO:0044422//GO:0044446//GO:0043229//GO:0005623//GO:0044444//GO:0005622//GO:0005634//GO:0044464//GO:0012505	trans-Golgi network//Golgi apparatus//Golgi subcompartment//cytoplasm//cellular_component//intracellular membrane-bounded organelle//organelle subcompartment//membrane-bounded organelle//Golgi apparatus part//organelle//intracellular part//organelle part//intracellular organelle part//intracellular organelle//cell//cytoplasmic part//intracellular//nucleus//cell part//endomembrane system	GO:0008270//GO:0003674//GO:0043167//GO:0005488//GO:0071253//GO:0046872//GO:0005515//GO:0046914//GO:0043169	zinc ion binding//molecular_function//ion binding//binding//connexin binding//metal ion binding//protein binding//transition metal ion binding//cation binding	no KO assigned | (RefSeq) E3 ubiquitin-protein ligase PRT6	http://www.genome.jp/dbget-bin/www_bget?sot:102603446	--	PREDICTED: E3 ubiquitin-protein ligase UBR2-like [Solanum tuberosum]
419	Novel03383	2196.15	6576.81	-1.5824	6.2256e-05	0.00035909	DOWN	--	--	--	--	--	--	no KO assigned | (RefSeq) uncharacterized LOC102591066	http://www.genome.jp/dbget-bin/www_bget?sot:102591066	--	PREDICTED: uncharacterized protein LOC102591066 isoform X1 [Solanum tuberosum]
420	Novel03430	930.804	2565.03	-1.4624	1.6658e-09	2.6877e-08	DOWN	GO:0051704//GO:0019048//GO:0016192//GO:0051701//GO:0016032//GO:0044403//GO:0051179//GO:0044764//GO:0035821//GO:0065007//GO:0044419//GO:0065008//GO:0051649//GO:0044003//GO:0051641//GO:0009987//GO:0032940//GO:0046903//GO:0006810//GO:0051234//GO:0008150//GO:0019087//GO:0051817//GO:0006887	multi-organism process//modulation by virus of host morphology or physiology//vesicle-mediated transport//interaction with host//viral process//symbiont process//localization//multi-organism cellular process//modification of morphology or physiology of other organism//biological regulation//interspecies interaction between organisms//regulation of biological quality//establishment of localization…	GO:0016021//GO:0000145//GO:0044424//GO:0044425//GO:0005622//GO:0044464//GO:0031224//GO:0005938//GO:0044448//GO:0044444//GO:0005623//GO:0005575//GO:0032991//GO:0016020//GO:0005737//GO:0071944	integral component of membrane//exocyst//intracellular part//membrane part//intracellular//cell part//intrinsic component of membrane//cell cortex//cell cortex part//cytoplasmic part//cell//cellular_component//protein-containing complex//membrane//cytoplasm//cell periphery	--	--	no KO assigned | (RefSeq) inactive poly [ADP-ribose] polymerase RCD1	http://www.genome.jp/dbget-bin/www_bget?sot:102584569	--	PREDICTED: inactive poly [ADP-ribose] polymerase RCD1-like isoform X1 [Solanum tuberosum]>gi|565391106|ref|XP_006361266.1| PREDICTED: inactive poly [ADP-ribose] polymerase RCD1-like isoform X2 [Solanum tuberosum]
421	Novel03437	0	32.0418	#NAME?	1.596e-07	1.6892e-06	DOWN	--	--	--	--	--	--	--	--	--	PREDICTED: probable serine/threonine-protein kinase irlF-like [Solanum tuberosum]
422	Novel03439	4603.52	9791.27	-1.0888	1.5225e-06	1.3015e-05	DOWN	--	--	GO:0009536//GO:0043226//GO:0009507//GO:0005737//GO:0043231//GO:0005575//GO:0043227//GO:0016020//GO:0005623//GO:0044444//GO:0005622//GO:0044464//GO:0044424//GO:0043229	plastid//organelle//chloroplast//cytoplasm//intracellular membrane-bounded organelle//cellular_component//membrane-bounded organelle//membrane//cell//cytoplasmic part//intracellular//cell part//intracellular part//intracellular organelle	--	--	no KO assigned | (RefSeq) protein TIC110, chloroplastic	http://www.genome.jp/dbget-bin/www_bget?sot:102597803	--	PREDICTED: protein TIC110, chloroplastic-like isoform X1 [Solanum tuberosum]
423	Novel03445	146.417	821.851	-2.4888	4.8092e-17	2.6787e-15	DOWN	GO:0008150//GO:0008152	biological_process//metabolic process	--	--	GO:0003824//GO:0003674	catalytic activity//molecular_function	K17973 N-terminal acetyltransferase B complex non-catalytic subunit | (RefSeq) N-alpha-acetyltransferase 25, NatB auxiliary subunit	http://www.genome.jp/dbget-bin/www_bget?sot:102582714	--	PREDICTED: N-alpha-acetyltransferase 25, NatB auxiliary subunit-like isoform X1 [Solanum tuberosum]
424	Novel03449	28.0572	536.498	-4.2571	3.0368e-05	0.00018917	DOWN	--	--	--	--	--	--	no KO assigned | (RefSeq) chromatin modification-related protein EAF1 B-like	http://www.genome.jp/dbget-bin/www_bget?sot:102588720	--	PREDICTED: chromatin modification-related protein EAF1-like [Solanum tuberosum]
425	Novel03450	281.303	731.761	-1.3792	2.9686e-07	2.9775e-06	DOWN	--	--	--	--	--	--	no KO assigned | (RefSeq) uncharacterized LOC102584867	http://www.genome.jp/dbget-bin/www_bget?sot:102584867	--	PREDICTED: uncharacterized protein LOC102584867 isoform X1 [Solanum tuberosum]>gi|565380782|ref|XP_006356771.1| PREDICTED: uncharacterized protein LOC102584867 isoform X2 [Solanum tuberosum]>gi|565380784|ref|XP_006356772.1| PREDICTED: uncharacterized protein LOC102584867 isoform X3 [Solanum tuberosum]>gi|565380786|ref|XP_006356773.1| PREDICTED: uncharacterized protein LOC102584867 isoform X4 [Sol…
426	Novel03473	1041.6	5592.68	-2.4247	2.1188e-05	0.00013684	DOWN	GO:0008150//GO:0009987//GO:0008152//GO:0071704//GO:0006725//GO:0044260//GO:0034641//GO:0006259//GO:0046483//GO:0044238//GO:0090304//GO:0006310//GO:0006807//GO:0044237//GO:1901360//GO:0006139//GO:0043170	biological_process//cellular process//metabolic process//organic substance metabolic process//cellular aromatic compound metabolic process//cellular macromolecule metabolic process//cellular nitrogen compound metabolic process//DNA metabolic process//heterocycle metabolic process//primary metabolic process//nucleic acid metabolic process//DNA recombination//nitrogen compound metabolic process//ce…	GO:0043226//GO:0043227//GO:0016020//GO:0043231//GO:0005575//GO:0005623//GO:0044464//GO:0031224//GO:0005634//GO:0005622//GO:0044424//GO:0044425//GO:0043229//GO:0016021	organelle//membrane-bounded organelle//membrane//intracellular membrane-bounded organelle//cellular_component//cell//cell part//intrinsic component of membrane//nucleus//intracellular//intracellular part//membrane part//intracellular organelle//integral component of membrane	GO:1901363//GO:0003676//GO:0003824//GO:0097159//GO:0016787//GO:0003674//GO:0003677//GO:0005515//GO:0005488	heterocyclic compound binding//nucleic acid binding//catalytic activity//organic cyclic compound binding//hydrolase activity//molecular_function//DNA binding//protein binding//binding	no KO assigned | (RefSeq) BSL2; serine/threonine-protein phosphatase BSL3-like	http://www.genome.jp/dbget-bin/www_bget?sot:102580135	--	Ser/Thr phosphatase-containing Kelch repeat domain protein [Solanum tuberosum]
427	Novel03484	2198.91	7657.07	-1.8	1.4307e-14	5.356e-13	DOWN	GO:0006096//GO:0019362//GO:0016310//GO:0009161//GO:0044237//GO:0006753//GO:0042278//GO:1901360//GO:0006139//GO:0072524//GO:0009167//GO:0009179//GO:0051186//GO:0009205//GO:0046483//GO:0044238//GO:0046031//GO:0043436//GO:0006165//GO:0006807//GO:0009150//GO:1901575//GO:0006732//GO:0072521//GO:0009116//GO:0006091//GO:0019752//GO:0009119//GO:1901135//GO:0034641//GO:0019693//GO:0009135//GO:0009259//GO:…	glycolytic process//pyridine nucleotide metabolic process//phosphorylation//ribonucleoside monophosphate metabolic process//cellular metabolic process//nucleoside phosphate metabolic process//purine nucleoside metabolic process//organic cyclic compound metabolic process//nucleobase-containing compound metabolic process//pyridine-containing compound metabolic process//purine ribonucleoside monopho…	--	--	GO:0046872//GO:0004743//GO:0005488//GO:0030955//GO:0043169//GO:0016773//GO:0031420//GO:0016772//GO:0043167//GO:0003674//GO:0000287//GO:0003824//GO:0016740	metal ion binding//pyruvate kinase activity//binding//potassium ion binding//cation binding//phosphotransferase activity, alcohol group as acceptor//alkali metal ion binding//transferase activity, transferring phosphorus-containing groups//ion binding//molecular_function//magnesium ion binding//catalytic activity//transferase activity	K00873 pyruvate kinase [EC:2.7.1.40] | (RefSeq) pyruvate kinase isozyme A, chloroplastic	http://www.genome.jp/dbget-bin/www_bget?sot:102581596	--	PREDICTED: pyruvate kinase isozyme A, chloroplastic-like [Solanum tuberosum]
428	Novel03501	603.036	1285.59	-1.0921	1.6317e-05	0.00010811	DOWN	GO:0050789//GO:0008150//GO:0023052//GO:0009987//GO:0080090//GO:0008152//GO:0005975//GO:0071704//GO:0006109//GO:0000160//GO:0065007//GO:0050794//GO:0050896//GO:0035556//GO:0044238//GO:0007165//GO:0051716//GO:0007154//GO:0019222	regulation of biological process//biological_process//signaling//cellular process//regulation of primary metabolic process//metabolic process//carbohydrate metabolic process//organic substance metabolic process//regulation of carbohydrate metabolic process//phosphorelay signal transduction system//biological regulation//regulation of cellular process//response to stimulus//intracellular signal tr…	--	--	GO:0016740//GO:1901363//GO:0003824//GO:0030554//GO:0004673//GO:0097159//GO:0032555//GO:0035639//GO:0032550//GO:0016301//GO:0005524//GO:0032553//GO:0036094//GO:0003674//GO:0038023//GO:0043167//GO:0004672//GO:0016772//GO:0001882//GO:0000166//GO:0016775//GO:0001883//GO:0016773//GO:0000155//GO:0005057//GO:0060089//GO:0005488//GO:0032549//GO:0032559//GO:0043168//GO:0017076//GO:0097367//GO:0004871//GO:…	transferase activity//heterocyclic compound binding//catalytic activity//adenyl nucleotide binding//protein histidine kinase activity//organic cyclic compound binding//purine ribonucleotide binding//purine ribonucleoside triphosphate binding//purine ribonucleoside binding//kinase activity//ATP binding//ribonucleotide binding//small molecule binding//molecular_function//signaling receptor activity…	no KO assigned | (RefSeq) uncharacterized LOC102582021	http://www.genome.jp/dbget-bin/www_bget?sot:102582021	--	PREDICTED: uncharacterized protein LOC102582021 [Solanum tuberosum]
429	Novel03502	1217.01	2502.63	-1.0401	0.00042856	0.0019671	DOWN	GO:0006810//GO:0051234//GO:0008150//GO:0009987//GO:0008152//GO:0005975//GO:0071704//GO:0000002//GO:0071840//GO:0006996//GO:0051179//GO:0044238//GO:0016043//GO:0007005	transport//establishment of localization//biological_process//cellular process//metabolic process//carbohydrate metabolic process//organic substance metabolic process//mitochondrial genome maintenance//cellular component organization or biogenesis//organelle organization//localization//primary metabolic process//cellular component organization//mitochondrion organization	GO:0043226//GO:0043233//GO:0005759//GO:0005737//GO:0070013//GO:0000229//GO:0043231//GO:0005575//GO:0044429//GO:0005739//GO:0016020//GO:0043227//GO:0043228//GO:0044444//GO:0005623//GO:0031974//GO:0005622//GO:0044464//GO:0042645//GO:0009295//GO:0043232//GO:0044424//GO:0000262//GO:0043229//GO:0044446//GO:0044422//GO:0005694	organelle//organelle lumen//mitochondrial matrix//cytoplasm//intracellular organelle lumen//cytoplasmic chromosome//intracellular membrane-bounded organelle//cellular_component//mitochondrial part//mitochondrion//membrane//membrane-bounded organelle//non-membrane-bounded organelle//cytoplasmic part//cell//membrane-enclosed lumen//intracellular//cell part//mitochondrial nucleoid//nucleoid//intrace…	GO:0022857//GO:0022829//GO:0003824//GO:0015288//GO:0022803//GO:0015267//GO:0016787//GO:0004553//GO:0003674//GO:0004559//GO:0005215//GO:0016798//GO:0015923	transmembrane transporter activity//wide pore channel activity//catalytic activity//porin activity//passive transmembrane transporter activity//channel activity//hydrolase activity//hydrolase activity, hydrolyzing O-glycosyl compounds//molecular_function//alpha-mannosidase activity//transporter activity//hydrolase activity, acting on glycosyl bonds//mannosidase activity	no KO assigned | (RefSeq) uncharacterized LOC102582691	http://www.genome.jp/dbget-bin/www_bget?sot:102582691	--	PREDICTED: uncharacterized protein LOC102582691 [Solanum tuberosum]
430	Novel03505	82.4553	425.22	-2.3665	6.3475e-05	0.00036535	DOWN	GO:0061136//GO:0009056//GO:0009987//GO:0044248//GO:0031329//GO:0009057//GO:0080090//GO:0031323//GO:0050789//GO:0010498//GO:0008150//GO:0023052//GO:0051246//GO:0044260//GO:0030163//GO:0071704//GO:0006508//GO:1903050//GO:0044265//GO:0051603//GO:0008152//GO:0019538//GO:1901575//GO:0042176//GO:0044238//GO:0007165//GO:0065007//GO:0050794//GO:0050896//GO:0044267//GO:0060255//GO:0032268//GO:0044257//GO:…	regulation of proteasomal protein catabolic process//catabolic process//cellular process//cellular catabolic process//regulation of cellular catabolic process//macromolecule catabolic process//regulation of primary metabolic process//regulation of cellular metabolic process//regulation of biological process//proteasomal protein catabolic process//biological_process//signaling//regulation of prote…	--	--	GO:0098519//GO:0004386//GO:0016462//GO:0097159//GO:0003724//GO:0016788//GO:1901363//GO:0003676//GO:0003824//GO:0030554//GO:0016791//GO:0016818//GO:0036094//GO:0003674//GO:0043167//GO:0032555//GO:0035639//GO:0043531//GO:0016787//GO:0032550//GO:0005524//GO:0032553//GO:0005515//GO:0003723//GO:0017111//GO:0001882//GO:0016887//GO:0000166//GO:0003677//GO:0001883//GO:0042578//GO:0017076//GO:0097367//GO:…	nucleotide phosphatase activity, acting on free nucleotides//helicase activity//pyrophosphatase activity//organic cyclic compound binding//RNA helicase activity//hydrolase activity, acting on ester bonds//heterocyclic compound binding//nucleic acid binding//catalytic activity//adenyl nucleotide binding//phosphatase activity//hydrolase activity, acting on acid anhydrides, in phosphorus-containing …	--	--	--	PREDICTED: TMV resistance protein N-like [Solanum tuberosum]
431	Novel03521	11.3046	47.2018	-2.0619	0.0085132	0.025779	DOWN	--	--	--	--	--	--	no KO assigned | (RefSeq) putative late blight resistance protein homolog R1A-3	http://www.genome.jp/dbget-bin/www_bget?sot:102594706	--	PREDICTED: putative late blight resistance protein homolog R1A-3 [Solanum lycopersicum]
432	Novel03522	18.4123	92.7178	-2.3322	0.00013662	0.00071827	DOWN	GO:0032774//GO:0034641//GO:0016070//GO:0034654//GO:0018130//GO:0009058//GO:0006807//GO:0010467//GO:0090304//GO:0044238//GO:0046483//GO:0044271//GO:0006139//GO:1901360//GO:0044237//GO:0009059//GO:0043170//GO:0008150//GO:0044249//GO:0019438//GO:1901362//GO:0009987//GO:0008152//GO:1901576//GO:0044260//GO:0006725//GO:0034645//GO:0006351//GO:0071704//GO:0097659	RNA biosynthetic process//cellular nitrogen compound metabolic process//RNA metabolic process//nucleobase-containing compound biosynthetic process//heterocycle biosynthetic process//biosynthetic process//nitrogen compound metabolic process//gene expression//nucleic acid metabolic process//primary metabolic process//heterocycle metabolic process//cellular nitrogen compound biosynthetic process//nu…	GO:0005623//GO:0005634//GO:0005622//GO:0044464//GO:0044424//GO:0043229//GO:0043226//GO:0043231//GO:0005575//GO:0043227	cell//nucleus//intracellular//cell part//intracellular part//intracellular organelle//organelle//intracellular membrane-bounded organelle//cellular_component//membrane-bounded organelle	GO:0016772//GO:0003899//GO:0016740//GO:0003824//GO:0034062//GO:0016779//GO:0003674	transferase activity, transferring phosphorus-containing groups//DNA-directed 5'-3' RNA polymerase activity//transferase activity//catalytic activity//5'-3' RNA polymerase activity//nucleotidyltransferase activity//molecular_function	--	--	--	--
433	Novel03532	5.52092	91.4502	-4.05	5.2109e-11	1.1243e-09	DOWN	GO:0044260//GO:1901576//GO:2001141//GO:0097659//GO:0071704//GO:0034645//GO:0006351//GO:0006725//GO:1903506//GO:0051252//GO:0008152//GO:0009987//GO:0051171//GO:0080090//GO:1901362//GO:0009889//GO:0050789//GO:0044249//GO:0031323//GO:0008150//GO:0031326//GO:0006355//GO:2000112//GO:0019438//GO:0019219//GO:0009059//GO:0043170//GO:0019222//GO:1901360//GO:0006139//GO:0044271//GO:0044237//GO:0010467//GO:…	cellular macromolecule metabolic process//organic substance biosynthetic process//regulation of RNA biosynthetic process//nucleic acid-templated transcription//organic substance metabolic process//cellular macromolecule biosynthetic process//transcription, DNA-templated//cellular aromatic compound metabolic process//regulation of nucleic acid-templated transcription//regulation of RNA metabolic p…	GO:0005575//GO:0016020//GO:0016021//GO:0044425//GO:0031224	cellular_component//membrane//integral component of membrane//membrane part//intrinsic component of membrane	GO:0003674//GO:0004175//GO:0016787//GO:0070011//GO:0097159//GO:0003676//GO:1901363//GO:0003824//GO:0008233//GO:0004190//GO:0005488//GO:0070001//GO:0003677	molecular_function//endopeptidase activity//hydrolase activity//peptidase activity, acting on L-amino acid peptides//organic cyclic compound binding//nucleic acid binding//heterocyclic compound binding//catalytic activity//peptidase activity//aspartic-type endopeptidase activity//binding//aspartic-type peptidase activity//DNA binding	no KO assigned | (RefSeq) NAC domain-containing protein 90-like	http://www.genome.jp/dbget-bin/www_bget?sot:102587110	--	PREDICTED: NAC domain-containing protein 90-like [Solanum lycopersicum]
434	Novel03536	2452.99	6096.61	-1.3135	0.00029519	0.0014236	DOWN	GO:0044237//GO:0009987//GO:0008150//GO:0008152//GO:0015979	cellular metabolic process//cellular process//biological_process//metabolic process//photosynthesis	GO:0044464//GO:0005622//GO:0005623//GO:0030076//GO:0044425//GO:0044424//GO:0042651//GO:0030089//GO:0034357//GO:0009579//GO:0044436//GO:0098796//GO:0016020//GO:0032991//GO:0005575	cell part//intracellular//cell//light-harvesting complex//membrane part//intracellular part//thylakoid membrane//phycobilisome//photosynthetic membrane//thylakoid//thylakoid part//membrane protein complex//membrane//protein-containing complex//cellular_component	GO:0005515//GO:0005488//GO:0003674	protein binding//binding//molecular_function	K19525 vacuolar protein sorting-associated protein 13A/C | (RefSeq) uncharacterized LOC102586877	http://www.genome.jp/dbget-bin/www_bget?sot:102586877	--	PREDICTED: uncharacterized protein LOC102586877 [Solanum tuberosum]
435	Novel03544	41.9776	133.761	-1.672	7.9026e-05	0.000443	DOWN	--	--	--	--	GO:0003674//GO:0005515//GO:0005488	molecular_function//protein binding//binding	--	--	--	PREDICTED: TMV resistance protein N-like [Solanum lycopersicum]
436	Novel03545	18.2124	78.6214	-2.11	0.00010031	0.000545	DOWN	--	--	--	--	GO:0003674//GO:0005515//GO:0005488	molecular_function//protein binding//binding	no KO assigned | (RefSeq) disease resistance protein TAO1-like	http://www.genome.jp/dbget-bin/www_bget?sot:102589440	--	PREDICTED: TMV resistance protein N-like [Solanum lycopersicum]
437	Novel03546	4.76975	36.989	-2.9551	0.00038743	0.0018037	DOWN	--	--	--	--	GO:0005515//GO:0005488//GO:0003674	protein binding//binding//molecular_function	no KO assigned | (RefSeq) TMV resistance protein N-like	http://www.genome.jp/dbget-bin/www_bget?sot:102587037	--	PREDICTED: TMV resistance protein N-like [Solanum lycopersicum]
438	Novel03558	76.168	195.245	-1.358	0.00019242	0.00097449	DOWN	--	--	--	--	--	--	K00927 phosphoglycerate kinase [EC:2.7.2.3] | (RefSeq) phosphoglycerate kinase, chloroplastic	http://www.genome.jp/dbget-bin/www_bget?sot:102577647	--	polypepetide with reverse transcriptase and RNaseH domains [Petunia x hybrida]
439	Novel03563	191.242	394.999	-1.0464	0.0004082	0.0018874	DOWN	--	--	--	--	--	--	K04733 interleukin-1 receptor-associated kinase 4 [EC:2.7.11.1] | (RefSeq) probable serine/threonine-protein kinase At1g18390	http://www.genome.jp/dbget-bin/www_bget?sot:102592110	--	PREDICTED: probable serine/threonine-protein kinase At1g18390-like [Solanum tuberosum]
440	Novel03572	125.499	361.508	-1.5263	1.0608e-06	9.4775e-06	DOWN	GO:0060255//GO:0010556//GO:0034654//GO:0050794//GO:0018130//GO:0050896//GO:0032774//GO:0010468//GO:0065007//GO:0006259//GO:0032870//GO:0016070//GO:0034641//GO:0007165//GO:0090304//GO:0070887//GO:0046483//GO:0044238//GO:0009058//GO:0006807//GO:0010467//GO:0044237//GO:0051716//GO:0009719//GO:0044271//GO:1901360//GO:0006139//GO:0071407//GO:0009725//GO:0071495//GO:0019222//GO:0010033//GO:0043170//GO:…	regulation of macromolecule metabolic process//regulation of macromolecule biosynthetic process//nucleobase-containing compound biosynthetic process//regulation of cellular process//heterocycle biosynthetic process//response to stimulus//RNA biosynthetic process//regulation of gene expression//biological regulation//DNA metabolic process//cellular response to hormone stimulus//RNA metabolic proce…	GO:0005623//GO:0044464//GO:0005634//GO:0005622//GO:0044424//GO:0043229//GO:0043226//GO:0043227//GO:0043231//GO:0005575	cell//cell part//nucleus//intracellular//intracellular part//intracellular organelle//organelle//membrane-bounded organelle//intracellular membrane-bounded organelle//cellular_component	GO:0003677//GO:0060089//GO:0030284//GO:0005488//GO:0003707//GO:0004871//GO:0003824//GO:1901363//GO:0003676//GO:0016491//GO:0097159//GO:0005496//GO:0008289//GO:0038023//GO:0003674	DNA binding//molecular transducer activity//estrogen receptor activity//binding//steroid hormone receptor activity//obsolete signal transducer activity//catalytic activity//heterocyclic compound binding//nucleic acid binding//oxidoreductase activity//organic cyclic compound binding//steroid binding//lipid binding//signaling receptor activity//molecular_function	no KO assigned | (RefSeq) uncharacterized LOC102595311	http://www.genome.jp/dbget-bin/www_bget?sot:102595311	--	hypothetical protein VITISV_026680 [Vitis vinifera]
441	Novel03579	45.3127	227.363	-2.327	0.0002081	0.001045	DOWN	--	--	--	--	--	--	no KO assigned | (RefSeq) uncharacterized LOC102586991	http://www.genome.jp/dbget-bin/www_bget?sot:102586991	--	PREDICTED: uncharacterized protein LOC104119708 [Nicotiana tomentosiformis]
442	Novel03594	1323.53	2700.26	-1.0287	1.6452e-05	0.00010893	DOWN	GO:0051716//GO:0044237//GO:0006974//GO:0006470//GO:0006950//GO:1901360//GO:0006139//GO:0006370//GO:0007154//GO:0043170//GO:0006464//GO:0050794//GO:0044267//GO:0050896//GO:0034641//GO:0016070//GO:0065007//GO:0006629//GO:0006259//GO:0036211//GO:0044238//GO:0046483//GO:0007165//GO:0009452//GO:0090304//GO:0006397//GO:0010467//GO:0019538//GO:0006310//GO:0035556//GO:0006807//GO:0016311//GO:0016071//GO:…	cellular response to stimulus//cellular metabolic process//cellular response to DNA damage stimulus//protein dephosphorylation//response to stress//organic cyclic compound metabolic process//nucleobase-containing compound metabolic process//7-methylguanosine mRNA capping//cell communication//macromolecule metabolic process//cellular protein modification process//regulation of cellular process//ce…	--	--	GO:0043168//GO:0005488//GO:0003910//GO:0003909//GO:0032549//GO:0032559//GO:0097367//GO:1901265//GO:0004435//GO:0017076//GO:0016874//GO:0004725//GO:0000166//GO:0001883//GO:0042578//GO:0016772//GO:0008192//GO:0001882//GO:0070568//GO:0005524//GO:0032553//GO:0008138//GO:0032555//GO:0004721//GO:0035639//GO:0032550//GO:0016787//GO:0004629//GO:0043167//GO:0004484//GO:0016791//GO:0036094//GO:0016779//GO:…	anion binding//binding//DNA ligase (ATP) activity//DNA ligase activity//ribonucleoside binding//adenyl ribonucleotide binding//carbohydrate derivative binding//nucleoside phosphate binding//phosphatidylinositol phospholipase C activity//purine nucleotide binding//ligase activity//protein tyrosine phosphatase activity//nucleotide binding//purine nucleoside binding//phosphoric ester hydrolase activ…	K13917 mRNA-capping enzyme [EC:2.7.7.50 3.6.1.-] | (RefSeq) mRNA-capping enzyme-like	http://www.genome.jp/dbget-bin/www_bget?sot:102600680	--	PREDICTED: mRNA-capping enzyme-like isoform X1 [Solanum tuberosum]
443	Novel03598	8.67233	34.0847	-1.9746	0.012061	0.034658	DOWN	GO:0008150//GO:0008152	biological_process//metabolic process	--	--	GO:0010333//GO:0016835//GO:0016838//GO:0003824//GO:0016829//GO:0003674	terpene synthase activity//carbon-oxygen lyase activity//carbon-oxygen lyase activity, acting on phosphates//catalytic activity//lyase activity//molecular_function	K04120 ent-copalyl diphosphate synthase [EC:5.5.1.13] | (RefSeq) ent-copalyl diphosphate synthase, chloroplastic-like	http://www.genome.jp/dbget-bin/www_bget?sot:102596242	--	PREDICTED: ent-copalyl diphosphate synthase, chloroplastic-like isoform X2 [Nicotiana tomentosiformis]
444	Novel03634	55.3377	562.877	-3.3465	1.7684e-05	0.0001161	DOWN	GO:0044238//GO:0008150//GO:0005975//GO:0071704//GO:0008152	primary metabolic process//biological_process//carbohydrate metabolic process//organic substance metabolic process//metabolic process	GO:0005575//GO:0016020	cellular_component//membrane	GO:0016773//GO:0004674//GO:0004672//GO:0016772//GO:0016758//GO:0016740//GO:0003824//GO:0016757//GO:0003674//GO:0016301	phosphotransferase activity, alcohol group as acceptor//protein serine/threonine kinase activity//protein kinase activity//transferase activity, transferring phosphorus-containing groups//transferase activity, transferring hexosyl groups//transferase activity//catalytic activity//transferase activity, transferring glycosyl groups//molecular_function//kinase activity	K14772 U3 small nucleolar RNA-associated protein 20 | (RefSeq) small subunit processome component 20 homolog	http://www.genome.jp/dbget-bin/www_bget?sot:102588637	--	PREDICTED: small subunit processome component 20 homolog [Solanum tuberosum]
445	Novel03636	4.04107	40.0266	-3.3082	0.001883	0.0070869	DOWN	--	--	--	--	GO:0032559//GO:0032549//GO:0016817//GO:0005488//GO:0043168//GO:0017076//GO:1901265//GO:0097367//GO:0001882//GO:0001883//GO:0000166//GO:0016887//GO:0017111//GO:0032550//GO:0016787//GO:0032555//GO:0035639//GO:0043531//GO:0005524//GO:0032553//GO:0036094//GO:0016818//GO:0003674//GO:0043167//GO:0030554//GO:0003824//GO:1901363//GO:0097159//GO:0016462	adenyl ribonucleotide binding//ribonucleoside binding//hydrolase activity, acting on acid anhydrides//binding//anion binding//purine nucleotide binding//nucleoside phosphate binding//carbohydrate derivative binding//nucleoside binding//purine nucleoside binding//nucleotide binding//ATPase activity//nucleoside-triphosphatase activity//purine ribonucleoside binding//hydrolase activity//purine ribon…	--	--	--	PREDICTED: TMV resistance protein N-like [Solanum tuberosum]
446	Novel03637	2.65475	19.4746	-2.8749	0.013475	0.038126	DOWN	--	--	--	--	--	--	no KO assigned | (RefSeq) glycine-rich cell wall structural protein-like	http://www.genome.jp/dbget-bin/www_bget?sot:102590037	--	PREDICTED: glycine-rich cell wall structural protein-like [Solanum tuberosum]
447	Novel03638	4.69078	75.9689	-4.0175	6.2765e-06	4.5941e-05	DOWN	--	--	GO:0031224//GO:0044425//GO:0016021//GO:0005575//GO:0016020	intrinsic component of membrane//membrane part//integral component of membrane//cellular_component//membrane	--	--	no KO assigned | (RefSeq) cold and drought-regulated protein CORA-like	http://www.genome.jp/dbget-bin/www_bget?sot:102590349	--	extensin class I (clone w1-8 L) - tomato (fragment)
448	PGSC0003DMG400000049	1.34986	20.3905	-3.917	0.0022074	0.0081215	DOWN	--	--	--	--	--	--	K12604 CCR4-NOT transcription complex subunit 1 | (RefSeq) CCR4-NOT transcription complex subunit 1-like	http://www.genome.jp/dbget-bin/www_bget?sot:102589155	-	CCR4-NOT transcription complex subunit 1, HEAT repeat||CCR4-NOT transcription complex subunit 1, TTP binding domain
449	PGSC0003DMG400000066	525.962	1384.94	-1.3968	2.631e-08	3.3423e-07	DOWN	GO:0006950//GO:0001101//GO:0050896//GO:0042221//GO:0009628//GO:0008150//GO:0009414//GO:0009415//GO:1901700//GO:0009269//GO:0010035	response to stress//response to acid chemical//response to stimulus//response to chemical//response to abiotic stimulus//biological_process//response to water deprivation//response to water//response to oxygen-containing compound//response to desiccation//response to inorganic substance	--	--	--	--	no KO assigned | (RefSeq) desiccation protectant protein Lea14 homolog	http://www.genome.jp/dbget-bin/www_bget?sot:102586330	-	Late embryogenesis abundant protein, LEA-14||Immunoglobulin-like fold||Water stress and hypersensitive response domain
450	PGSC0003DMG400000108	8414.05	16912.8	-1.0072	5.447e-05	0.00031826	DOWN	--	--	--	--	--	--	K03255 protein TIF31 | (RefSeq) protein TSS-like	http://www.genome.jp/dbget-bin/www_bget?sot:102581004	--	--
451	PGSC0003DMG400000139	14.1568	253.487	-4.1623	1.7662e-22	1.9068e-20	DOWN	GO:0008150//GO:0008152	biological_process//metabolic process	--	--	GO:0003674//GO:0016787//GO:0003824	molecular_function//hydrolase activity//catalytic activity	no KO assigned | (RefSeq) probable carboxylesterase 8	http://www.genome.jp/dbget-bin/www_bget?sot:102603898	-	Alpha/Beta hydrolase fold||Alpha/beta hydrolase fold-3
452	PGSC0003DMG400000146	2.37911	22.0424	-3.2118	0.0039387	0.013344	DOWN	GO:0008150//GO:0008152//GO:0055114	biological_process//metabolic process//oxidation-reduction process	--	--	GO:0016705//GO:0005488//GO:0005506//GO:0016491//GO:0003824//GO:0046906//GO:1901363//GO:0020037//GO:0003674//GO:0046914//GO:0097159//GO:0043167//GO:0046872//GO:0043169	oxidoreductase activity, acting on paired donors, with incorporation or reduction of molecular oxygen//binding//iron ion binding//oxidoreductase activity//catalytic activity//tetrapyrrole binding//heterocyclic compound binding//heme binding//molecular_function//transition metal ion binding//organic cyclic compound binding//ion binding//metal ion binding//cation binding	no KO assigned | (RefSeq) cytochrome P450 704C1-like	http://www.genome.jp/dbget-bin/www_bget?sot:102605237	-	Cytochrome P450||Cytochrome P450, E-class, group I
453	PGSC0003DMG400000151	646.882	1384.41	-1.0977	0.00087427	0.003647	DOWN	--	--	--	--	--	--	K09480 digalactosyldiacylglycerol synthase [EC:2.4.1.241] | (RefSeq) digalactosyldiacylglycerol synthase 2, chloroplastic	http://www.genome.jp/dbget-bin/www_bget?sot:102580118	--	--
454	PGSC0003DMG400000165	78.1005	223.657	-1.5179	1.8497e-05	0.00012115	DOWN	GO:0008150//GO:0009628//GO:0006950//GO:0050896//GO:0009266//GO:0009409	biological_process//response to abiotic stimulus//response to stress//response to stimulus//response to temperature stimulus//response to cold	--	--	--	--	no KO assigned | (RefSeq) F-box/kelch-repeat protein SKIP4	http://www.genome.jp/dbget-bin/www_bget?sot:102591056	SKIP4	Kelch-type beta propeller||F-box domain||Kelch repeat type 1
455	PGSC0003DMG400000181	1256.94	3547.72	-1.497	0.0045737	0.015132	DOWN	--	--	GO:0044425//GO:0005575//GO:0016021//GO:0031224//GO:0016020	membrane part//cellular_component//integral component of membrane//intrinsic component of membrane//membrane	--	--	no KO assigned | (RefSeq) uncharacterized LOC102605461	http://www.genome.jp/dbget-bin/www_bget?sot:102605461	-	EGF-like, conserved site||Protein of unknown function DUF3522
456	PGSC0003DMG400000228	227.701	552.439	-1.2787	5.344e-06	3.9883e-05	DOWN	--	--	--	--	--	--	no KO assigned | (RefSeq) uncharacterized LOC102584123	http://www.genome.jp/dbget-bin/www_bget?sot:102584123	--	--
457	PGSC0003DMG400000230	614.751	1596.05	-1.3764	6.045e-06	4.4433e-05	DOWN	--	--	--	--	--	--	no KO assigned | (RefSeq) UV-stimulated scaffold protein A homolog	http://www.genome.jp/dbget-bin/www_bget?sot:102584783	-	ENTH/VHS||Protein of unknown function DUF2043
458	PGSC0003DMG400000242	190.086	570.239	-1.5849	3.1492e-08	3.9079e-07	DOWN	--	--	--	--	--	--	no KO assigned | (RefSeq) pentatricopeptide repeat-containing protein At5g16420, mitochondrial	http://www.genome.jp/dbget-bin/www_bget?sot:102593620	-	Pentatricopeptide repeat||Tetratricopeptide-like helical domain
459	PGSC0003DMG400000251	217.907	472.263	-1.1159	9.1806e-05	0.00050436	DOWN	--	--	GO:0031224//GO:0016020//GO:0005575//GO:0016021//GO:0044425	intrinsic component of membrane//membrane//cellular_component//integral component of membrane//membrane part	--	--	K15277 solute carrier family 35 (adenosine 3'-phospho 5'-phosphosulfate transporter), member B3 | (RefSeq) UDP-galactose/UDP-glucose transporter 4-like	http://www.genome.jp/dbget-bin/www_bget?sot:102596365	--	--
460	PGSC0003DMG400000282	506.354	1915.9	-1.9198	7.735e-07	7.1205e-06	DOWN	GO:1901564//GO:0008150//GO:0009069//GO:0000096//GO:0000097//GO:1901566//GO:0044249//GO:0044283//GO:1901607//GO:0019752//GO:0006807//GO:0009058//GO:0006534//GO:0006082//GO:0008652//GO:0006790//GO:0044281//GO:0043436//GO:0044238//GO:0019344//GO:0009987//GO:0008152//GO:0006563//GO:0044237//GO:0006535//GO:0016053//GO:0044272//GO:0009070//GO:0046394//GO:0006520//GO:1901576//GO:0071704//GO:1901605	organonitrogen compound metabolic process//biological_process//serine family amino acid metabolic process//sulfur amino acid metabolic process//sulfur amino acid biosynthetic process//organonitrogen compound biosynthetic process//cellular biosynthetic process//small molecule biosynthetic process//alpha-amino acid biosynthetic process//carboxylic acid metabolic process//nitrogen compound metabolic…	GO:0005623//GO:0005622//GO:0044464//GO:0005737//GO:0044424//GO:0005575	cell//intracellular//cell part//cytoplasm//intracellular part//cellular_component	GO:0016740//GO:0016747//GO:0003824//GO:0008374//GO:0009001//GO:0016412//GO:0016746//GO:0016407//GO:0003674//GO:0016413	transferase activity//transferase activity, transferring acyl groups other than amino-acyl groups//catalytic activity//O-acyltransferase activity//serine O-acetyltransferase activity//serine O-acyltransferase activity//transferase activity, transferring acyl groups//acetyltransferase activity//molecular_function//O-acetyltransferase activity	K00640 serine O-acetyltransferase [EC:2.3.1.30] | (RefSeq) serine acetyltransferase 5	http://www.genome.jp/dbget-bin/www_bget?sot:102586509	ATSERAT1;1	Hexapeptide transferase, conserved site||Serine O-acetyltransferase||Serine acetyltransferase, N-terminal||Trimeric LpxA-like||Hexapeptide repeat
461	PGSC0003DMG400000310	106.373	601.813	-2.5002	4.5879e-17	2.5651e-15	DOWN	--	--	--	--	--	--	--	--	--	--
462	PGSC0003DMG400000322	2101.38	7586.03	-1.852	2.7449e-15	1.1759e-13	DOWN	GO:0051707//GO:0051649//GO:0009615//GO:0051704//GO:0043207//GO:0051641//GO:0009605//GO:0016482//GO:0046907//GO:0051179//GO:0009607//GO:0051169//GO:0006913//GO:0050896//GO:0008150//GO:0006810//GO:0051234	response to other organism//establishment of localization in cell//response to virus//multi-organism process//response to external biotic stimulus//cellular localization//response to external stimulus//cytosolic transport//intracellular transport//localization//response to biotic stimulus//nuclear transport//nucleocytoplasmic transport//response to stimulus//biological_process//transport//establi…	GO:0005575//GO:0005737//GO:0044424//GO:0044464//GO:0005622//GO:0005829//GO:0005623//GO:0044444	cellular_component//cytoplasm//intracellular part//cell part//intracellular//cytosol//cell//cytoplasmic part	GO:0043167//GO:1901265//GO:0097367//GO:0003674//GO:0036094//GO:0016818//GO:0017076//GO:0003924//GO:0032553//GO:0043168//GO:0032549//GO:0016817//GO:0032550//GO:0016787//GO:0035639//GO:0032555//GO:0005488//GO:0097159//GO:0032561//GO:0016462//GO:0017111//GO:0003824//GO:0005525//GO:0001883//GO:0000166//GO:1901363//GO:0001882//GO:0019001	ion binding//nucleoside phosphate binding//carbohydrate derivative binding//molecular_function//small molecule binding//hydrolase activity, acting on acid anhydrides, in phosphorus-containing anhydrides//purine nucleotide binding//GTPase activity//ribonucleotide binding//anion binding//ribonucleoside binding//hydrolase activity, acting on acid anhydrides//purine ribonucleoside binding//hydrolase …	no KO assigned | (RefSeq) probable ADP-ribosylation factor GTPase-activating protein AGD14	http://www.genome.jp/dbget-bin/www_bget?sot:102589035	NIG	-
463	PGSC0003DMG400000333	934.868	2228.99	-1.2536	1.3794e-07	1.4843e-06	DOWN	GO:0044237//GO:0042440//GO:0016108//GO:0008152//GO:0016114//GO:1901576//GO:0006721//GO:0071704//GO:0016117//GO:0016116//GO:0044255//GO:0044249//GO:0016109//GO:0006629//GO:0008150//GO:0046148//GO:0055114//GO:0008610//GO:0009058//GO:0009987//GO:0044238//GO:0006720//GO:0008299	cellular metabolic process//pigment metabolic process//tetraterpenoid metabolic process//metabolic process//terpenoid biosynthetic process//organic substance biosynthetic process//terpenoid metabolic process//organic substance metabolic process//carotenoid biosynthetic process//carotenoid metabolic process//cellular lipid metabolic process//cellular biosynthetic process//tetraterpenoid biosynthet…	GO:0044425//GO:0016021//GO:0005575//GO:0016020//GO:0031224	membrane part//integral component of membrane//cellular_component//membrane//intrinsic component of membrane	GO:0003674//GO:0016491//GO:0016705//GO:0003824	molecular_function//oxidoreductase activity//oxidoreductase activity, acting on paired donors, with incorporation or reduction of molecular oxygen//catalytic activity	K06444 lycopene epsilon-cyclase [EC:5.5.1.18] | (RefSeq) LCYe; lycopene epsilon cyclase, chloroplastic	http://www.genome.jp/dbget-bin/www_bget?sot:102577922	LUT2	Lycopene cyclase, beta/epsilon||FAD/NAD(P)-binding domain
464	PGSC0003DMG400000364	3423.85	8723.93	-1.3494	4.6952e-09	6.8869e-08	DOWN	GO:0006397//GO:0010467//GO:0006807//GO:0006396//GO:0046483//GO:0044238//GO:0000377//GO:0009987//GO:0090304//GO:0000398//GO:0016070//GO:0034641//GO:0008150//GO:0044260//GO:0071704//GO:0043170//GO:0008380//GO:0006725//GO:1901360//GO:0006139//GO:0016071//GO:0044237//GO:0000375//GO:0008152	mRNA processing//gene expression//nitrogen compound metabolic process//RNA processing//heterocycle metabolic process//primary metabolic process//RNA splicing, via transesterification reactions with bulged adenosine as nucleophile//cellular process//nucleic acid metabolic process//mRNA splicing, via spliceosome//RNA metabolic process//cellular nitrogen compound metabolic process//biological_proces…	GO:0005634//GO:0005681//GO:0005622//GO:0043226//GO:0044464//GO:0005623//GO:0043229//GO:0044446//GO:0044422//GO:0043231//GO:0005575//GO:0032991//GO:0043227//GO:0044428//GO:0044424	nucleus//spliceosomal complex//intracellular//organelle//cell part//cell//intracellular organelle//intracellular organelle part//organelle part//intracellular membrane-bounded organelle//cellular_component//protein-containing complex//membrane-bounded organelle//nuclear part//intracellular part	--	--	K06063 SNW domain-containing protein 1 | (RefSeq) SNW/SKI-interacting protein	http://www.genome.jp/dbget-bin/www_bget?sot:102602288	-	SKI-interacting protein, SKIP||SKI-interacting protein SKIP, SNW domain
465	PGSC0003DMG400000443	319.014	740.307	-1.2145	6.3761e-06	4.6601e-05	DOWN	--	--	GO:0031224//GO:0044425//GO:0005575//GO:0016021//GO:0016020	intrinsic component of membrane//membrane part//cellular_component//integral component of membrane//membrane	--	--	no KO assigned | (RefSeq) uncharacterized LOC102580380	http://www.genome.jp/dbget-bin/www_bget?sot:102580380	--	--
466	PGSC0003DMG400000457	8303.13	29747.6	-1.841	8.0146e-05	0.00044886	DOWN	GO:0008150//GO:0055114//GO:0008152	biological_process//oxidation-reduction process//metabolic process	--	--	GO:0051537//GO:0003824//GO:0016491//GO:0010277//GO:0016703//GO:0051536//GO:0005488//GO:0004497//GO:0016701//GO:0051540//GO:0003674	2 iron, 2 sulfur cluster binding//catalytic activity//oxidoreductase activity//chlorophyllide a oxygenase [overall] activity//oxidoreductase activity, acting on single donors with incorporation of molecular oxygen, incorporation of one atom of oxygen (internal monooxygenases or internal mixed function oxidases)//iron-sulfur cluster binding//binding//monooxygenase activity//oxidoreductase activity…	K13071 pheophorbide a oxygenase [EC:1.14.15.17] | (RefSeq) pheophorbide a oxygenase, chloroplastic	http://www.genome.jp/dbget-bin/www_bget?sot:102579316	ACD1	Rieske [2Fe-2S] iron-sulphur domain||Pheophorbide a oxygenase
467	PGSC0003DMG400000478	33.5449	83.6503	-1.3183	0.0065609	0.020588	DOWN	--	--	--	--	--	--	K15271 ATP-dependent DNA helicase HFM1/MER3 [EC:3.6.4.12] | (RefSeq) ATP-dependent DNA helicase MER3 homolog	http://www.genome.jp/dbget-bin/www_bget?sot:102581133	-	Pentatricopeptide repeat||Tetratricopeptide-like helical domain
468	PGSC0003DMG400000558	4059.75	9251.32	-1.1883	1.7545e-05	0.00011531	DOWN	--	--	GO:0044425//GO:0016020//GO:0005575//GO:0016021//GO:0031224	membrane part//membrane//cellular_component//integral component of membrane//intrinsic component of membrane	--	--	no KO assigned | (RefSeq) uncharacterized LOC102592566	http://www.genome.jp/dbget-bin/www_bget?sot:102592566	--	--
469	PGSC0003DMG400000597	349.629	895.47	-1.3568	2.7669e-07	2.7959e-06	DOWN	GO:0044271//GO:0006139//GO:1901360//GO:1903506//GO:0008152//GO:0051252//GO:0044237//GO:0009059//GO:0019219//GO:2001141//GO:1901576//GO:0044260//GO:0006725//GO:0019222//GO:0043170//GO:0034645//GO:0006351//GO:0071704//GO:0097659//GO:0065007//GO:0010468//GO:0032774//GO:2000112//GO:0006355//GO:0031326//GO:0008150//GO:0044249//GO:0031323//GO:0050789//GO:0009889//GO:0034641//GO:0016070//GO:0034654//GO:…	cellular nitrogen compound biosynthetic process//nucleobase-containing compound metabolic process//organic cyclic compound metabolic process//regulation of nucleic acid-templated transcription//metabolic process//regulation of RNA metabolic process//cellular metabolic process//macromolecule biosynthetic process//regulation of nucleobase-containing compound metabolic process//regulation of RNA bio…	GO:0044424//GO:0043231//GO:0005575//GO:0043229//GO:0043227//GO:0005623//GO:0005634//GO:0005622//GO:0043226//GO:0044464	intracellular part//intracellular membrane-bounded organelle//cellular_component//intracellular organelle//membrane-bounded organelle//cell//nucleus//intracellular//organelle//cell part	GO:0005488//GO:0003674//GO:1901363//GO:0003676//GO:0003677//GO:0097159	binding//molecular_function//heterocyclic compound binding//nucleic acid binding//DNA binding//organic cyclic compound binding	no KO assigned | (RefSeq) transcription factor TCP14	http://www.genome.jp/dbget-bin/www_bget?sot:102589520	AtTCP14	Transcription factor TCP subgroup||Transcription factor, TCP
470	PGSC0003DMG400000611	70.598	171	-1.2763	0.00084095	0.0035268	DOWN	--	--	--	--	--	--	no KO assigned | (RefSeq) pentatricopeptide repeat-containing protein At1g52640, mitochondrial	http://www.genome.jp/dbget-bin/www_bget?sot:102594967	-	Pentatricopeptide repeat||Tetratricopeptide-like helical domain||Pentacotripeptide-repeat region of PRORP
471	PGSC0003DMG400000662	150.745	451.647	-1.5831	1.1426e-07	1.2531e-06	DOWN	GO:0043412//GO:0044267//GO:0008150//GO:0036211//GO:0044238//GO:0009987//GO:0019538//GO:0016311//GO:0006796//GO:0008152//GO:0006470//GO:0044237//GO:0006793//GO:0035335//GO:0071704//GO:0043170//GO:0044260//GO:0006464	macromolecule modification//cellular protein metabolic process//biological_process//protein modification process//primary metabolic process//cellular process//protein metabolic process//dephosphorylation//phosphate-containing compound metabolic process//metabolic process//protein dephosphorylation//cellular metabolic process//phosphorus metabolic process//peptidyl-tyrosine dephosphorylation//orga…	--	--	GO:0042578//GO:0003824//GO:0004725//GO:0016788//GO:0016787//GO:0004721//GO:0008138//GO:0003674//GO:0016791	phosphoric ester hydrolase activity//catalytic activity//protein tyrosine phosphatase activity//hydrolase activity, acting on ester bonds//hydrolase activity//phosphoprotein phosphatase activity//protein tyrosine/serine/threonine phosphatase activity//molecular_function//phosphatase activity	K04459 dual specificity MAP kinase phosphatase [EC:3.1.3.16 3.1.3.48] | (RefSeq) protein-tyrosine-phosphatase IBR5-like	http://www.genome.jp/dbget-bin/www_bget?sot:102579669	-	Dual specificity phosphatase, catalytic domain||Protein-tyrosine phosphatase, active site||Protein-tyrosine phosphatase-like||Dual specificity phosphatase||Tyrosine specific protein phosphatases domain||Dual specificity protein phosphatase domain
472	PGSC0003DMG400000727	250.967	523.689	-1.0612	0.00017439	0.00089169	DOWN	GO:0060255//GO:0010556//GO:0019438//GO:0034654//GO:0050794//GO:0018130//GO:0032774//GO:2000112//GO:0010468//GO:0065007//GO:0008150//GO:0031326//GO:0006355//GO:0050789//GO:0044249//GO:0031323//GO:0016070//GO:0034641//GO:0009889//GO:1901362//GO:0080090//GO:0090304//GO:0044238//GO:0046483//GO:0009987//GO:0051171//GO:0009058//GO:0006807//GO:0010467//GO:0008152//GO:0051252//GO:0044237//GO:0044271//GO:…	regulation of macromolecule metabolic process//regulation of macromolecule biosynthetic process//aromatic compound biosynthetic process//nucleobase-containing compound biosynthetic process//regulation of cellular process//heterocycle biosynthetic process//RNA biosynthetic process//regulation of cellular macromolecule biosynthetic process//regulation of gene expression//biological regulation//biol…	--	--	GO:1901363//GO:0003677//GO:0003676//GO:0003690//GO:0097159//GO:0005488//GO:0003674	heterocyclic compound binding//DNA binding//nucleic acid binding//double-stranded DNA binding//organic cyclic compound binding//binding//molecular_function	K15032 mTERF domain-containing protein, mitochondrial | (RefSeq) uncharacterized LOC102586135	http://www.genome.jp/dbget-bin/www_bget?sot:102586135	EMB2219	Transcription termination factor, mitochondrial/chloroplastic
473	PGSC0003DMG400000741	4.08358	24.119	-2.5623	0.0091117	0.027321	DOWN	GO:0008152//GO:0008150//GO:0055114	metabolic process//biological_process//oxidation-reduction process	GO:0044425//GO:0016020//GO:0016021//GO:0005575//GO:0031224	membrane part//membrane//integral component of membrane//cellular_component//intrinsic component of membrane	GO:0046906//GO:0005506//GO:0005488//GO:0004497//GO:0046872//GO:0043167//GO:0003674//GO:1901363//GO:0020037//GO:0003824//GO:0016491//GO:0016705//GO:0043169//GO:0097159//GO:0046914	tetrapyrrole binding//iron ion binding//binding//monooxygenase activity//metal ion binding//ion binding//molecular_function//heterocyclic compound binding//heme binding//catalytic activity//oxidoreductase activity//oxidoreductase activity, acting on paired donors, with incorporation or reduction of molecular oxygen//cation binding//organic cyclic compound binding//transition metal ion binding	no KO assigned | (RefSeq) geraniol 8-hydroxylase-like	http://www.genome.jp/dbget-bin/www_bget?sot:102597793	-	Cytochrome P450, conserved site||Cytochrome P450||Cytochrome P450, E-class, group I
474	PGSC0003DMG400000771	38.3299	108.333	-1.4989	0.0017518	0.0066524	DOWN	--	--	--	--	--	--	K20725 MAP kinase substrate 1 | (RefSeq) protein MKS1-like	http://www.genome.jp/dbget-bin/www_bget?sot:102602119	-	VQ
475	PGSC0003DMG400000791	1318.03	2772.83	-1.073	0.017482	0.047568	DOWN	GO:0044237//GO:0008152//GO:0032446//GO:0043170//GO:0071704//GO:0006464//GO:0044260//GO:0016567//GO:0043412//GO:0070647//GO:0044267//GO:0008150//GO:0036211//GO:0009987//GO:0044238//GO:0019538	cellular metabolic process//metabolic process//protein modification by small protein conjugation//macromolecule metabolic process//organic substance metabolic process//cellular protein modification process//cellular macromolecule metabolic process//protein ubiquitination//macromolecule modification//protein modification by small protein conjugation or removal//cellular protein metabolic process//…	--	--	GO:0019787//GO:0003674//GO:0003824//GO:0016740//GO:0004842	ubiquitin-like protein transferase activity//molecular_function//catalytic activity//transferase activity//ubiquitin-protein transferase activity	no KO assigned | (RefSeq) phor1; U-box domain-containing protein 28-like	http://www.genome.jp/dbget-bin/www_bget?sot:102603918	-	Armadillo-type fold||Zinc finger, RING/FYVE/PHD-type||U box domain||Armadillo-like helical
476	PGSC0003DMG400000813	326.69	704.356	-1.1084	2.9547e-05	0.0001846	DOWN	GO:0008150//GO:0006952//GO:0050896//GO:0006950	biological_process//defense response//response to stimulus//response to stress	--	--	GO:0001882//GO:0001883//GO:0030554//GO:1901363//GO:0000166//GO:0097159//GO:0032550//GO:0032559//GO:0032549//GO:0032555//GO:0005488//GO:0043531//GO:0043168//GO:0032553//GO:0036094//GO:0003674//GO:0017076//GO:1901265//GO:0043167//GO:0097367	nucleoside binding//purine nucleoside binding//adenyl nucleotide binding//heterocyclic compound binding//nucleotide binding//organic cyclic compound binding//purine ribonucleoside binding//adenyl ribonucleotide binding//ribonucleoside binding//purine ribonucleotide binding//binding//ADP binding//anion binding//ribonucleotide binding//small molecule binding//molecular_function//purine nucleotide b…	--	--	-	Winged helix-turn-helix DNA-binding domain||Leucine-rich repeat domain, L domain-like||NB-ARC||P-loop containing nucleoside triphosphate hydrolase
477	PGSC0003DMG400000815	25.6602	276.356	-3.4289	1.0901e-05	7.5667e-05	DOWN	--	--	--	--	GO:0001882//GO:0000166//GO:1901363//GO:0030554//GO:0001883//GO:0097159//GO:0043531//GO:0032555//GO:0005488//GO:0032549//GO:0032559//GO:0032550//GO:0032553//GO:0043168//GO:0017076//GO:0003674//GO:0036094//GO:0097367//GO:0043167//GO:1901265	nucleoside binding//nucleotide binding//heterocyclic compound binding//adenyl nucleotide binding//purine nucleoside binding//organic cyclic compound binding//ADP binding//purine ribonucleotide binding//binding//ribonucleoside binding//adenyl ribonucleotide binding//purine ribonucleoside binding//ribonucleotide binding//anion binding//purine nucleotide binding//molecular_function//small molecule b…	no KO assigned | (RefSeq) putative late blight resistance protein homolog R1B-12	http://www.genome.jp/dbget-bin/www_bget?sot:102585344	-	P-loop containing nucleoside triphosphate hydrolase||NB-ARC
478	PGSC0003DMG400000816	743.508	1622.17	-1.1255	5.0579e-06	3.8015e-05	DOWN	GO:0008150//GO:0006952//GO:0050896//GO:0006950	biological_process//defense response//response to stimulus//response to stress	--	--	GO:0001882//GO:0001883//GO:0030554//GO:1901363//GO:0000166//GO:0097159//GO:0032550//GO:0032559//GO:0032549//GO:0032555//GO:0005488//GO:0043531//GO:0043168//GO:0032553//GO:0036094//GO:0003674//GO:0017076//GO:1901265//GO:0043167//GO:0097367	nucleoside binding//purine nucleoside binding//adenyl nucleotide binding//heterocyclic compound binding//nucleotide binding//organic cyclic compound binding//purine ribonucleoside binding//adenyl ribonucleotide binding//ribonucleoside binding//purine ribonucleotide binding//binding//ADP binding//anion binding//ribonucleotide binding//small molecule binding//molecular_function//purine nucleotide b…	--	--	-	Leucine-rich repeat domain, L domain-like||NB-ARC||P-loop containing nucleoside triphosphate hydrolase||Winged helix-turn-helix DNA-binding domain
[truncated: 2,026 more rows]
